# Supplementary material for: Scenarios of environmental change in a post-conflict Colombia
Source: Research Square preprint supplement (doi:10.21203/rs.3.rs-445412/v1), 2021-05-27
Supplement: Supplementary file 1 [file 817139d34798d458bef5b286.csv]

	DEPARTMENT	scientificName	Scenario	R2018	R2036	PR1836	redlistCategory	ForestSpecies	Endemic	NAME
1	1	Stachytarpheta jamaicensis	BAU	41963.5	41929.67	-0.0806176796501763	NA	NA	NA	Amazonas
2	1	Psychotria carthagenensis	BAU	0	0	NA	NA	NA	NA	Amazonas
3	1	Sapium laurifolium	HIGH	48787.09	48730.96	-0.115050928432086	Least Concern	1	NA	Amazonas
4	1	Tibouchina gracilis	BAU	0	0	NA	NA	NA	NA	Amazonas
5	1	Aechmea longifolia	LOW	84189.82	84164.65	-0.0298967262312864	NA	NA	NA	Amazonas
6	1	Ara ambiguus	LOW	0	0	NA	Endangered	1	NA	Amazonas
7	1	Baccharis caespitosa	BAU	0	0	NA	NA	NA	NA	Amazonas
8	1	Akodon aerosus	HIGH	0	0	NA	Least Concern	1	NA	Amazonas
9	1	Pitcairnia riparia	BAU	0	0	NA	NA	NA	NA	Amazonas
10	1	Cratoneuron filicinum	HIGH	15312.82	15290.37	-0.14660918106527	NA	NA	NA	Amazonas
11	1	Hyptis atrorubens	HIGH	0	0	NA	NA	NA	NA	Amazonas
12	1	Thamnophilus cryptoleucus	HIGH	7765.44	7759.3	-0.0790682820290855	Near Threatened	1	NA	Amazonas
13	1	Passiflora mollissima	HIGH	0	0	NA	NA	NA	NA	Amazonas
14	1	Schoenoplectus californicus	HIGH	0	0	NA	NA	NA	NA	Amazonas
15	1	Pteroglossus inscriptus	BAU	28660.93	28625.61	-0.123233963447801	Least Concern	1	NA	Amazonas
16	1	Mikania hookeriana	LOW	0	0	NA	NA	NA	NA	Amazonas
17	1	Cnemarchus erythropygius	HIGH	20311.81	20302.26	-0.0470169817461019	Least Concern	1	NA	Amazonas
18	1	Monstera obliqua	LOW	0	0	NA	NA	NA	NA	Amazonas
19	1	Psychotria hazenii	BAU	0	0	NA	NA	NA	NA	Amazonas
20	1	Malachra alceifolia	LOW	0	0	NA	NA	NA	NA	Amazonas
21	1	Anthurium decurrens	LOW	0	0	NA	NA	NA	NA	Amazonas
22	1	Brotogeris sanctithomae	BAU	0	0	NA	Least Concern	1	NA	Amazonas
23	1	Mezobromelia bicolor	LOW	82780.97	82754.21	-0.0323262701560452	NA	NA	NA	Amazonas
24	1	Anthurium lancifolium	BAU	0	0	NA	NA	NA	NA	Amazonas
25	1	Inga sierrae	LOW	0	0	NA	Least Concern	1	NA	Amazonas
26	1	Lecythis minor	BAU	0	0	NA	Least Concern	1	NA	Amazonas
27	1	Heliconia chartacea	BAU	0	0	NA	NA	NA	NA	Amazonas
28	1	Chamissoa altissima	BAU	22061.41	22060.69	-0.00326361732999461	NA	NA	NA	Amazonas
29	1	Solanum evolvulifolium	LOW	0	0	NA	NA	NA	NA	Amazonas
30	1	Macairea thyrsiflora	BAU	0	0	NA	NA	NA	NA	Amazonas
31	1	Hydropsalis climacocerca	LOW	2549.12	2548.45	-0.0262835802159205	NA	NA	NA	Amazonas
32	1	Stenospermation zeacarpium	BAU	0	0	NA	NA	NA	NA	Amazonas
33	1	Artibeus obscurus	LOW	55783.71	55740.54	-0.0773881837547167	Least Concern	1	NA	Amazonas
34	1	Calamagrostis effusa	BAU	0	0	NA	NA	NA	NA	Amazonas
35	1	Arthrostemma ciliatum	HIGH	0	0	NA	NA	NA	NA	Amazonas
36	1	Anthracothorax prevostii	HIGH	0	0	NA	Least Concern	1	NA	Amazonas
37	1	Antennaria linearifolia	LOW	0	0	NA	NA	NA	NA	Amazonas
38	1	Chlorostilbon poortmani	LOW	0	0	NA	Least Concern	1	NA	Amazonas
39	1	Pachyramphus minor	BAU	1252.09	1250.72	-0.109417054684559	Least Concern	1	NA	Amazonas
40	1	Coccyzus melacoryphus	HIGH	0	0	NA	Least Concern	1	NA	Amazonas
41	1	Jacamerops aureus	LOW	0	0	NA	Least Concern	1	NA	Amazonas
42	1	Grallaria nuchalis	LOW	0	0	NA	Least Concern	1	NA	Amazonas
43	1	Topaza pella	LOW	0	0	NA	Least Concern	1	NA	Amazonas
44	1	Polypodium loriceum	BAU	87946.1	87938.37	-0.00878947446221092	NA	NA	NA	Amazonas
45	1	Psychotria huampamiensis	BAU	92279.56	92239.26	-0.0436716429943997	NA	NA	NA	Amazonas
46	1	Conostegia speciosa	LOW	92429.45	92402.29	-0.0293845738560637	NA	NA	NA	Amazonas
47	1	Solanum pedemontanum	HIGH	99370.87	99329.82	-0.0413098929293749	NA	NA	NA	Amazonas
48	1	Scytalopus griseicollis	LOW	0	0	NA	Least Concern	1	NA	Amazonas
49	1	Unonopsis floribunda	BAU	37424.32	37386.94	-0.0998815743345434	Least Concern	1	NA	Amazonas
50	1	Calyptrocarya bicolor	BAU	0	0	NA	NA	NA	NA	Amazonas
51	1	Leucoloma serrulatum	BAU	0	0	NA	NA	NA	NA	Amazonas
52	1	Basileuterus cinereicollis	BAU	0	0	NA	NA	NA	NA	Amazonas
53	1	Ctenobrycon spilurus	BAU	0	0	NA	NA	NA	NA	Amazonas
54	1	Tillandsia bulbosa	HIGH	0	0	NA	NA	NA	NA	Amazonas
55	1	Dendropsophus triangulum	BAU	0	0	NA	Least Concern	1	NA	Amazonas
56	1	Desmoscelis villosa	BAU	0	0	NA	NA	NA	NA	Amazonas
57	1	Richeria grandis	BAU	0	0	NA	NA	NA	NA	Amazonas
58	1	Hieronyma fendleri	LOW	0	0	NA	NA	NA	NA	Amazonas
59	1	Poecilia sphenops	LOW	0	0	NA	NA	NA	NA	Amazonas
60	1	Cercomacra tyrannina	BAU	98378.44	98337.59	-0.0415233256392415	NA	NA	NA	Amazonas
61	1	Celosia argentea	BAU	0	0	NA	NA	NA	NA	Amazonas
62	1	Arachnothryx reflexa	LOW	3175.56	3156.81	-0.590447039262366	Least Concern	1	NA	Amazonas
63	1	Pecluma plumula	BAU	105341.41	105300.43	-0.0389020803879599	NA	NA	NA	Amazonas
64	1	Piper aduncum	HIGH	0	0	NA	Least Concern	1	NA	Amazonas
65	1	Momotus momota	LOW	1713.72	1708.84	-0.284760637677106	Least Concern	1	NA	Amazonas
66	1	Tolmomyias sulphurescens	LOW	97515.49	97461.31	-0.0555604037881649	Least Concern	1	NA	Amazonas
67	1	Pristimantis viejas	HIGH	0	0	NA	Least Concern	1	1	Amazonas
68	1	Scinax ruber	BAU	93634.62	93594.02	-0.0433600307236696	Least Concern	1	NA	Amazonas
69	1	Palicourea andrei	LOW	44299.33	44264.42	-0.0788048035941029	NA	NA	NA	Amazonas
70	1	Campephilus haematogaster	BAU	5634.71	5631.58	-0.0555485552938857	Least Concern	1	NA	Amazonas
71	1	Gynoxys hallii	BAU	0	0	NA	Least Concern	1	NA	Amazonas
72	1	Kyllinga brevifolia	BAU	0	0	NA	Least Concern	1	NA	Amazonas
73	1	Guazuma ulmifolia	HIGH	4135.17	4109.65	-0.617145123416944	Least Concern	1	NA	Amazonas
74	1	Miconia amazonica	BAU	0	0	NA	Least Concern	1	NA	Amazonas
75	1	Solanum crotonifolium	HIGH	0	0	NA	NA	NA	NA	Amazonas
76	1	Dracontium spruceanum	BAU	0	0	NA	NA	NA	NA	Amazonas
77	1	Cupania americana	HIGH	38711.04	38692.2	-0.0486682868763117	NA	NA	NA	Amazonas
78	1	Perissocephalus tricolor	LOW	0	0	NA	Least Concern	1	NA	Amazonas
79	1	Astrocaryum murumuru	BAU	84907.87	84867.52	-0.0475220965971603	NA	NA	NA	Amazonas
80	1	Hypotrachyna bogotensis	BAU	0	0	NA	NA	NA	NA	Amazonas
81	1	Calopogonium caeruleum	HIGH	9747.66	9707.9	-0.407892766058728	NA	NA	NA	Amazonas
82	1	Chiroderma trinitatum	LOW	0	0	NA	Least Concern	1	NA	Amazonas
83	1	Lepyrodon tomentosus	HIGH	43726.75	43710.08	-0.0381231168563825	NA	NA	NA	Amazonas
84	1	Heliodoxa schreibersii	LOW	0	0	NA	Least Concern	1	NA	Amazonas
85	1	Sporophila murallae	BAU	0	0	NA	Least Concern	1	1	Amazonas
86	1	Mabea klugii	LOW	0	0	NA	Least Concern	1	NA	Amazonas
87	1	Hyptis pectinata	LOW	0	0	NA	NA	NA	NA	Amazonas
88	1	Myrmeciza hyperythra	BAU	0	0	NA	NA	NA	NA	Amazonas
89	1	Annona edulis	BAU	0	0	NA	NA	NA	NA	Amazonas
90	1	Henicorhina leucosticta	HIGH	0	0	NA	Least Concern	1	NA	Amazonas
91	1	Cranioleuca hellmayri	BAU	0	0	NA	Least Concern	1	1	Amazonas
92	1	Monstera subpinnata	HIGH	0	0	NA	NA	NA	NA	Amazonas
93	1	Cyperus laxus	BAU	12897.5	12895.97	-0.0118627641015751	NA	NA	NA	Amazonas
94	1	Miconia goniostigma	HIGH	0	0	NA	NA	NA	NA	Amazonas
95	1	Hymenophyllum fragile	HIGH	0	0	NA	NA	NA	NA	Amazonas
96	1	Grallaria alleni	BAU	52179.57	52142.26	-0.0715030806118135	Vulnerable	1	1	Amazonas
97	1	Celosia argentea	HIGH	0	0	NA	NA	NA	NA	Amazonas
98	1	Solanum hayesii	BAU	10059.64	10043.35	-0.161934224286347	Least Concern	1	NA	Amazonas
99	1	Pristimantis achatinus	HIGH	12231.62	12190.96	-0.332417128720494	Least Concern	1	NA	Amazonas
100	1	Scrobicaria ilicifolia	HIGH	0	0	NA	NA	NA	NA	Amazonas
101	1	Micoureus regina	HIGH	90172.31	90114.31	-0.0643212977465033	NA	NA	NA	Amazonas
102	1	Miconia stelligera	LOW	62284.68	62239.49	-0.072553957088649	NA	NA	NA	Amazonas
103	1	Palicourea macrobotrys	LOW	0	0	NA	NA	NA	NA	Amazonas
104	1	Senna silvestris	BAU	0	0	NA	NA	NA	NA	Amazonas
105	1	Bolborhynchus lineola	LOW	0	0	NA	Least Concern	1	NA	Amazonas
106	1	Scytalopus latebricola	BAU	0	0	NA	Near Threatened	1	1	Amazonas
107	1	Breutelia trianae	BAU	0	0	NA	NA	NA	NA	Amazonas
108	1	Faramea tamberlikiana	HIGH	97824.29	97752.87	-0.0730084521952557	Least Concern	1	NA	Amazonas
109	1	Dendropsophus columbianus	BAU	26648.71	26612.51	-0.13584147225138	NA	NA	1	Amazonas
110	1	Hyperbaena domingensis	LOW	0	0	NA	NA	NA	NA	Amazonas
111	1	Inga hayesii	HIGH	0	0	NA	Least Concern	1	NA	Amazonas
112	1	Thraupis episcopus	BAU	0	0	NA	NA	NA	NA	Amazonas
113	1	Sakesphorus canadensis	BAU	0	0	NA	Least Concern	1	NA	Amazonas
114	1	Columbina buckleyi	BAU	0	0	NA	Least Concern	1	NA	Amazonas
115	1	Solanum acerifolium	LOW	0	0	NA	NA	NA	NA	Amazonas
116	1	Percnostola rufifrons	BAU	0	0	NA	Least Concern	1	NA	Amazonas
117	1	Erycina pusilla	LOW	68326.75	68278.28	-0.070938541639989	NA	NA	NA	Amazonas
118	1	Dracontium spruceanum	HIGH	0	0	NA	NA	NA	NA	Amazonas
119	1	Thuidium tomentosum	BAU	0	0	NA	NA	NA	NA	Amazonas
120	1	Melinaea ludovica	LOW	0	0	NA	NA	NA	NA	Amazonas
121	1	Palicourea demissa	HIGH	79847.83	79819.81	-0.0350917488928679	NA	NA	NA	Amazonas
122	1	Lophosoria quadripinnata	BAU	0	0	NA	NA	NA	NA	Amazonas
123	1	Artibeus cinereus	HIGH	0	0	NA	NA	NA	NA	Amazonas
124	1	Hypothyris fluonia	BAU	0	0	NA	NA	NA	NA	Amazonas
125	1	Piculus leucolaemus	LOW	0	0	NA	Least Concern	1	NA	Amazonas
126	1	Rhamnus sphaerosperma	LOW	0	0	NA	NA	NA	NA	Amazonas
127	1	Erigeron bonariensis	BAU	105382.41	105341.43	-0.0388869451742568	NA	NA	NA	Amazonas
128	1	Cebus capucinus	BAU	36302.15	36269.88	-0.0888928066244123	NA	NA	NA	Amazonas
129	1	Bixa orellana	HIGH	0	0	NA	Least Concern	1	NA	Amazonas
130	1	Porzana albicollis	BAU	8861.92	8840.87	-0.237533175654929	NA	NA	NA	Amazonas
131	1	Hypopterygium tamarisci	BAU	0	0	NA	NA	NA	NA	Amazonas
132	1	Guettarda crispiflora	BAU	0	0	NA	Least Concern	1	NA	Amazonas
133	1	Adiantum wilsonii	HIGH	0	0	NA	NA	NA	NA	Amazonas
134	1	Annona quinduensis	BAU	55680.54	55678.41	-0.00382539393475239	NA	NA	NA	Amazonas
135	1	Myrciaria dubia	HIGH	0	0	NA	Least Concern	1	NA	Amazonas
136	1	Alchorneopsis floribunda	LOW	0	0	NA	NA	NA	NA	Amazonas
137	1	Hirtella bullata	BAU	41067.55	41066.39	-0.00282461456795814	Least Concern	1	NA	Amazonas
138	1	Rhinella macrorhina	LOW	0	0	NA	Vulnerable	1	1	Amazonas
139	1	Leptopogon rufipectus	LOW	0	0	NA	Least Concern	1	NA	Amazonas
140	1	Glossophaga soricina	HIGH	0	0	NA	Least Concern	1	NA	Amazonas
141	1	Norops vittigerus	BAU	0	0	NA	NA	NA	NA	Amazonas
142	1	Mirabilis jalapa	HIGH	0	0	NA	NA	NA	NA	Amazonas
143	1	Mitu tuberosum	LOW	0	0	NA	Least Concern	1	NA	Amazonas
144	1	Cuphea carthagenensis	HIGH	0	0	NA	NA	NA	NA	Amazonas
145	1	Calidris minutilla	BAU	0	0	NA	Least Concern	1	NA	Amazonas
146	1	Festuca subulifolia	BAU	0	0	NA	NA	NA	NA	Amazonas
147	1	Billbergia tessmannii	HIGH	92264.1	92227.99	-0.0391376494216066	NA	NA	NA	Amazonas
148	1	Xiphidium caeruleum	LOW	0	0	NA	NA	NA	NA	Amazonas
149	1	Myrmeciza nigricauda	LOW	0	0	NA	NA	NA	NA	Amazonas
150	1	Psychotria poeppigiana	BAU	0	0	NA	NA	NA	NA	Amazonas
151	1	Dicranopteris pectinata	LOW	0	0	NA	NA	NA	NA	Amazonas
152	1	Phytelephas macrocarpa	HIGH	0	0	NA	NA	NA	NA	Amazonas
153	1	Azorella pedunculata	LOW	0	0	NA	NA	NA	NA	Amazonas
154	1	Hieronyma fendleri	HIGH	0	0	NA	NA	NA	NA	Amazonas
155	1	Pteroglossus pluricinctus	LOW	0	0	NA	Least Concern	1	NA	Amazonas
156	1	Brosimum alicastrum	HIGH	78194.01	78129.75	-0.0821802079212906	NA	NA	NA	Amazonas
157	1	Pyrrhura melanura	BAU	0	0	NA	Least Concern	1	NA	Amazonas
158	1	Myrmeciza longipes	HIGH	0	0	NA	Least Concern	1	NA	Amazonas
159	1	Solanum lepidotum	LOW	0	0	NA	Least Concern	1	NA	Amazonas
160	1	Picumnus exilis	HIGH	0	0	NA	Least Concern	1	NA	Amazonas
161	1	Ixora killipii	HIGH	0	0	NA	Least Concern	1	NA	Amazonas
162	1	Psychotria florentina	BAU	62897.99	62859.08	-0.0618620722220157	NA	NA	NA	Amazonas
163	1	Cucumis dipsaceus	HIGH	13959.54	13918.64	-0.292989597078424	NA	NA	NA	Amazonas
164	1	Corchorus siliquosus	HIGH	38133.03	38092.97	-0.105053283203558	NA	NA	NA	Amazonas
165	1	Iridosornis rufivertex	BAU	0	0	NA	Least Concern	1	NA	Amazonas
166	1	Dichrozona cincta	HIGH	32281.9	32267.42	-0.04485485674636	Least Concern	1	NA	Amazonas
167	1	Passiflora rubra	HIGH	25653.05	25639.63	-0.0523134675993625	NA	NA	NA	Amazonas
168	1	Phyllomyias cinereiceps	HIGH	17820.88	17806.14	-0.0827119648412514	Least Concern	1	NA	Amazonas
169	1	Battus polydamas	LOW	67772.67	67733.45	-0.0578699348867341	NA	NA	NA	Amazonas
170	1	Porophyllum ruderale	BAU	0	0	NA	NA	NA	NA	Amazonas
171	1	Rhinella ruizi	BAU	0	0	NA	Vulnerable	1	1	Amazonas
172	1	Oxandra polyantha	BAU	0	0	NA	Least Concern	1	NA	Amazonas
173	1	Monotagma laxum	HIGH	104915.31	104840.13	-0.0716577971317942	NA	NA	NA	Amazonas
174	1	Sporophila luctuosa	BAU	0	0	NA	NA	NA	NA	Amazonas
175	1	Philodendron jodavisianum	LOW	0	0	NA	NA	NA	NA	Amazonas
176	1	Prionodon densus	LOW	32761.71	32725.33	-0.111044264783485	NA	NA	NA	Amazonas
177	1	Anthurium bonplandii	BAU	0	0	NA	Least Concern	1	NA	Amazonas
178	1	Acnistus arborescens	LOW	88765.29	88738.61	-0.0300567935957772	NA	NA	NA	Amazonas
179	1	Guatteria hyposericea	HIGH	105133.32	105061.47	-0.0683417968727762	NA	NA	NA	Amazonas
180	1	Geonoma deversa	HIGH	0	0	NA	NA	NA	NA	Amazonas
181	1	Pellaea ternifolia	LOW	0	0	NA	NA	NA	NA	Amazonas
182	1	Palicourea punicea	BAU	0	0	NA	NA	NA	NA	Amazonas
183	1	Corythopis torquatus	LOW	70709.01	70688.06	-0.0296284730899175	Least Concern	1	NA	Amazonas
184	1	Henicorhina leucophrys	BAU	0	0	NA	Least Concern	1	NA	Amazonas
185	1	Siphocampylus scandens	LOW	0	0	NA	Least Concern	1	NA	Amazonas
186	1	Myrmotherula surinamensis	BAU	0	0	NA	Vulnerable	1	NA	Amazonas
187	1	Indigofera trita	HIGH	0	0	NA	Least Concern	1	NA	Amazonas
188	1	Galium hypocarpium	LOW	3527.91	3526.35	-0.044218815105826	NA	NA	NA	Amazonas
189	1	Aratinga weddellii	HIGH	0	0	NA	Least Concern	1	NA	Amazonas
190	1	Blechnum polypodioides	HIGH	0	0	NA	NA	NA	NA	Amazonas
191	1	Turdus leucomelas	HIGH	0	0	NA	Least Concern	1	NA	Amazonas
192	1	Miconia centronioides	LOW	0	0	NA	Least Concern	1	NA	Amazonas
193	1	Hypothyris fluonia	HIGH	0	0	NA	NA	NA	NA	Amazonas
194	1	Duguetia odorata	BAU	0	0	NA	Least Concern	1	NA	Amazonas
195	1	Bauhinia brachycalyx	HIGH	0	0	NA	Least Concern	1	NA	Amazonas
196	1	Dendropsophus bogerti	HIGH	0	0	NA	Least Concern	1	1	Amazonas
197	1	Crenicichla wallacii	HIGH	0	0	NA	NA	NA	NA	Amazonas
198	1	Schistes geoffroyi	LOW	0	0	NA	Least Concern	1	NA	Amazonas
199	1	Caladium bicolor	HIGH	49704.21	49657.7	-0.0935735624809288	NA	NA	NA	Amazonas
200	1	Paspalum candidum	LOW	0	0	NA	NA	NA	NA	Amazonas
201	1	Hylocharis eliciae	BAU	0	0	NA	Least Concern	1	NA	Amazonas
202	1	Cedrelinga cateniformis	BAU	0	0	NA	Least Concern	1	NA	Amazonas
203	1	Tropaeolum tuberosum	BAU	0	0	NA	NA	NA	NA	Amazonas
204	1	Maxillaria lepidota	LOW	0	0	NA	NA	NA	NA	Amazonas
205	1	Lophornis delattrei	HIGH	0	0	NA	Least Concern	1	NA	Amazonas
206	1	Pavonia fruticosa	BAU	0	0	NA	NA	NA	NA	Amazonas
207	1	Aburria pipile	BAU	0	0	NA	NA	NA	NA	Amazonas
208	1	Pteroglossus pluricinctus	BAU	0	0	NA	Least Concern	1	NA	Amazonas
209	1	Miconia tetrasperma	BAU	0	0	NA	NA	NA	NA	Amazonas
210	1	Saccoloma inaequale	HIGH	489.39	480.21	-1.87580457303991	NA	NA	NA	Amazonas
211	1	Guatteria amplifolia	BAU	0	0	NA	Least Concern	1	NA	Amazonas
212	1	Calliandra purdiaei	BAU	0	0	NA	NA	NA	NA	Amazonas
213	1	Cyanocompsa brissonii	HIGH	4180.72	4179.69	-0.0246369046480189	NA	NA	NA	Amazonas
214	1	Podager nacunda	BAU	0	0	NA	NA	NA	NA	Amazonas
215	1	Solanum loxophyllum	HIGH	0	0	NA	NA	NA	NA	Amazonas
216	1	Dictyonema glabratum	HIGH	0	0	NA	NA	NA	NA	Amazonas
217	1	Chironectes minimus	BAU	102979.59	102940.05	-0.0383959578786375	Least Concern	1	NA	Amazonas
218	1	Palicourea cogolloi	BAU	104113.97	104081.12	-0.0315519617588358	NA	NA	NA	Amazonas
219	1	Cypseloides cryptus	BAU	0	0	NA	Least Concern	1	NA	Amazonas
220	1	Formicarius nigricapillus	HIGH	32761.75	32749.03	-0.0388257648019448	Least Concern	1	NA	Amazonas
221	1	Peperomia obtusifolia	BAU	0	0	NA	NA	NA	NA	Amazonas
222	1	Sturnira ludovici	LOW	20144.05	20113.6	-0.151161261017525	Least Concern	1	NA	Amazonas
223	1	Macfadyena uncata	BAU	0	0	NA	NA	NA	NA	Amazonas
224	1	Guzmania sprucei	LOW	99950.02	99895.3	-0.0547473627318946	NA	NA	NA	Amazonas
225	1	Hypsiboas pugnax	HIGH	0	0	NA	NA	NA	NA	Amazonas
226	1	Theristicus caudatus	LOW	0	0	NA	NA	NA	NA	Amazonas
227	1	Microbates collaris	HIGH	0	0	NA	Least Concern	1	NA	Amazonas
228	1	Hydrolycus scomberoides	HIGH	0	0	NA	NA	NA	NA	Amazonas
229	1	Tachyphonus rufus	LOW	0	0	NA	Least Concern	1	NA	Amazonas
230	1	Polystachya concreta	LOW	0	0	NA	NA	NA	NA	Amazonas
231	1	Piranga rubriceps	LOW	0	0	NA	Least Concern	1	NA	Amazonas
232	1	Saccharum officinarum	HIGH	0	0	NA	NA	NA	NA	Amazonas
233	1	Drepanocladus aduncus	HIGH	0	0	NA	NA	NA	NA	Amazonas
234	1	Kutchubaea semisericea	BAU	40068.87	40030.92	-0.0947119297349897	NA	NA	NA	Amazonas
235	1	Myiozetetes granadensis	BAU	0	0	NA	Least Concern	1	NA	Amazonas
236	1	Pharus lappulaceus	HIGH	0	0	NA	NA	NA	NA	Amazonas
237	1	Ficus citrifolia	BAU	57773.04	57767.63	-0.00936422940527882	Least Concern	1	NA	Amazonas
238	1	Agrostis foliata	LOW	0	0	NA	NA	NA	NA	Amazonas
239	1	Campylopus areodictyon	HIGH	0	0	NA	NA	NA	NA	Amazonas
240	1	Syzygium jambos	BAU	0	0	NA	NA	NA	NA	Amazonas
241	1	Neckeropsis disticha	BAU	0	0	NA	NA	NA	NA	Amazonas
242	1	Psychotria longicuspis	LOW	0	0	NA	NA	NA	NA	Amazonas
243	1	Amaranthus spinosus	HIGH	0	0	NA	NA	NA	NA	Amazonas
244	1	Centropogon solanifolius	BAU	0	0	NA	NA	NA	NA	Amazonas
245	1	Anaxagorea brevipes	LOW	0	0	NA	Least Concern	1	NA	Amazonas
246	1	Abarema jupunba	LOW	17830.75	17801.49	-0.164098537638621	Least Concern	1	NA	Amazonas
247	1	Campylorhynchus nuchalis	LOW	0	0	NA	Least Concern	1	NA	Amazonas
248	1	Chlorochrysa nitidissima	LOW	0	0	NA	Near Threatened	1	1	Amazonas
249	1	Entomodestes coracinus	LOW	101114.9	101080.79	-0.0337339007406431	Least Concern	1	NA	Amazonas
250	1	Claravis mondetoura	BAU	2540.98	2540.75	-0.00905162575069533	NA	NA	NA	Amazonas
251	1	Costus acreanus	HIGH	0	0	NA	NA	NA	NA	Amazonas
252	1	Psychotria pilosa	LOW	0	0	NA	NA	NA	NA	Amazonas
253	1	Acalypha stachyura	LOW	40752.04	40735.07	-0.0416420871200587	NA	NA	NA	Amazonas
254	1	Pentacalia theifolia	HIGH	0	0	NA	NA	NA	NA	Amazonas
255	1	Thamnophilus murinus	BAU	0	0	NA	Least Concern	1	NA	Amazonas
256	1	Neopipo cinnamomea	LOW	0	0	NA	Least Concern	1	NA	Amazonas
257	1	Orthostichopsis tetragona	LOW	0	0	NA	NA	NA	NA	Amazonas
258	1	Euphorbia tithymaloides	BAU	0	0	NA	Least Concern	1	NA	Amazonas
259	1	Sclerurus caudacutus	BAU	0	0	NA	Least Concern	1	NA	Amazonas
260	1	Mionectes olivaceus	HIGH	0	0	NA	Least Concern	1	NA	Amazonas
261	1	Phyllanthus amarus	LOW	0	0	NA	NA	NA	NA	Amazonas
262	1	Linum usitatissimum	HIGH	0	0	NA	NA	NA	NA	Amazonas
263	1	Cortaderia jubata	BAU	0	0	NA	NA	NA	NA	Amazonas
264	1	Aeschynomene sensitiva	BAU	0	0	NA	NA	NA	NA	Amazonas
265	1	Polypodium triseriale	BAU	0	0	NA	NA	NA	NA	Amazonas
266	1	Crescentia cujete	LOW	0	0	NA	Least Concern	1	NA	Amazonas
267	1	Quiscalus mexicanus	BAU	0	0	NA	Least Concern	1	NA	Amazonas
268	1	Pristimantis acatallelus	BAU	30442.5	30405.9	-0.120226656812018	Least Concern	1	1	Amazonas
269	1	Conostegia superba	LOW	52365.14	52328.5	-0.0699702130081184	NA	NA	NA	Amazonas
270	1	Tachyphonus cristatus	BAU	0	0	NA	NA	NA	NA	Amazonas
271	1	Siphocampylus giganteus	BAU	0	0	NA	NA	NA	NA	Amazonas
272	1	Castilleja arvensis	LOW	66197.56	66175.88	-0.0327504518293318	NA	NA	NA	Amazonas
273	1	Phylloderma stenops	BAU	0	0	NA	Least Concern	1	NA	Amazonas
274	1	Margyricarpus pinnatus	HIGH	30487.29	30468.5	-0.0616322408452863	NA	NA	NA	Amazonas
275	1	Cotinga maynana	BAU	101356.73	101315.83	-0.040352525185051	Least Concern	1	NA	Amazonas
276	1	Clidemia dimorphica	HIGH	68094.62	68073.57	-0.0309128680062953	NA	NA	NA	Amazonas
277	1	Miconia affinis	HIGH	70041.26	69991.02	-0.0717291493613774	Least Concern	1	NA	Amazonas
278	1	Ischnosiphon puberulus	HIGH	0	0	NA	NA	NA	NA	Amazonas
279	1	Turdus obsoletus	HIGH	12572.39	12521.51	-0.404696322656227	Least Concern	1	NA	Amazonas
280	1	Pilherodius pileatus	HIGH	0	0	NA	NA	NA	NA	Amazonas
281	1	Tococa guianensis	BAU	0	0	NA	Least Concern	1	NA	Amazonas
282	1	Micronycteris minuta	LOW	102839.45	102788.53	-0.0495140726637475	Least Concern	1	NA	Amazonas
283	1	Blakea rosea	BAU	0	0	NA	NA	NA	NA	Amazonas
284	1	Guzmania coriostachya	BAU	0	0	NA	NA	NA	NA	Amazonas
285	1	Solanum ochranthum	LOW	33423.16	33389.9	-0.0995118355056854	NA	NA	NA	Amazonas
286	1	Micrurus dumerilii	BAU	48312.16	48310.64	-0.00314620584135355	NA	NA	NA	Amazonas
287	1	Didymocistus chrysadenius	BAU	50082.68	50079.24	-0.00686864201357102	Least Concern	1	NA	Amazonas
288	1	Inga stipularis	BAU	92239.51	92227.51	-0.0130096094395991	Least Concern	1	NA	Amazonas
289	1	Syrrhopodon gaudichaudii	LOW	22536.63	22506.03	-0.135778951866371	NA	NA	NA	Amazonas
290	1	Moenkhausia oligolepis	LOW	0	0	NA	NA	NA	NA	Amazonas
291	1	Phyllanthus urinaria	BAU	78542.88	78538.95	-0.00500363623030829	NA	NA	NA	Amazonas
292	1	Galbula cyanescens	HIGH	19992.59	19951.25	-0.206776610734278	Least Concern	1	NA	Amazonas
293	1	Thryothorus mystacalis	BAU	0	0	NA	NA	NA	NA	Amazonas
294	1	Croton hirtus	HIGH	81227.91	81193.79	-0.0420052664164447	NA	NA	NA	Amazonas
295	1	Calamagrostis macrophylla	BAU	3612.36	3596.44	-0.44070912090711	NA	NA	NA	Amazonas
296	1	Myrmeciza atrothorax	BAU	28453.04	28450.64	-0.0084349510632307	NA	NA	NA	Amazonas
297	1	Cyathea pungens	HIGH	0	0	NA	NA	NA	NA	Amazonas
298	1	Calamagrostis macrophylla	LOW	3619.75	3602.41	-0.479038607638653	NA	NA	NA	Amazonas
299	1	Lophornis stictolophus	HIGH	0	0	NA	Least Concern	1	NA	Amazonas
300	1	Miconia calvescens	LOW	0	0	NA	Least Concern	1	NA	Amazonas
301	1	Lepidopilum scabrisetum	LOW	0	0	NA	NA	NA	NA	Amazonas
302	1	Thelypteris decussata	HIGH	51954.22	51937.54	-0.0321051879905045	NA	NA	NA	Amazonas
303	1	Munnozia senecionidis	LOW	0	0	NA	NA	NA	NA	Amazonas
304	1	Cyclarhis nigrirostris	BAU	77805.79	77801	-0.0061563541736336	Least Concern	1	NA	Amazonas
305	1	Inezia subflava	LOW	51162.66	51124.6	-0.0743901900331315	Least Concern	1	NA	Amazonas
306	1	Bactris fissifrons	HIGH	0	0	NA	Least Concern	1	NA	Amazonas
307	1	Acestrorhynchus microlepis	HIGH	0	0	NA	NA	NA	NA	Amazonas
308	1	Larus argentatus	BAU	0	0	NA	NA	NA	NA	Amazonas
309	1	Pristimantis acatallelus	LOW	30451.09	30418.76	-0.106170255317631	Least Concern	1	1	Amazonas
310	1	Oncorhynchus mykiss	BAU	71257.47	71217.4	-0.0562327009364871	NA	NA	NA	Amazonas
311	1	Inga acrocephala	BAU	86300.22	86260.45	-0.04608331241798	Least Concern	1	NA	Amazonas
312	1	Florisuga mellivora	HIGH	0	0	NA	Least Concern	1	NA	Amazonas
313	1	Cnemoscopus rubrirostris	HIGH	0	0	NA	Least Concern	1	NA	Amazonas
314	1	Echinodorus horizontalis	BAU	0	0	NA	NA	NA	NA	Amazonas
315	1	Henriettea stellaris	HIGH	0	0	NA	Least Concern	1	NA	Amazonas
316	1	Bothriechis schlegelii	BAU	9352.34	9331.23	-0.225718910989128	Least Concern	1	NA	Amazonas
317	1	Calidris minutilla	LOW	0	0	NA	Least Concern	1	NA	Amazonas
318	1	Dendrocygna autumnalis	BAU	29430.53	29425.36	-0.0175667920353397	NA	NA	NA	Amazonas
319	1	Ludovia integrifolia	LOW	0	0	NA	NA	NA	NA	Amazonas
320	1	Xiphorhynchus erythropygius	LOW	0	0	NA	Least Concern	1	NA	Amazonas
321	1	Dicranopteris flexuosa	HIGH	0	0	NA	NA	NA	NA	Amazonas
322	1	Bactris fissifrons	LOW	0	0	NA	Least Concern	1	NA	Amazonas
323	1	Ruellia chartacea	LOW	15592.98	15566.84	-0.16763954035726	NA	NA	NA	Amazonas
324	1	Notopleura longipedunculoides	HIGH	0	0	NA	NA	NA	NA	Amazonas
325	1	Nasturtium officinale	LOW	0	0	NA	NA	NA	NA	Amazonas
326	1	Phylloderma stenops	HIGH	0	0	NA	Least Concern	1	NA	Amazonas
327	1	Pinirampus pirinampu	BAU	0	0	NA	NA	NA	NA	Amazonas
328	1	Napeogenes inachia	HIGH	0	0	NA	NA	NA	NA	Amazonas
329	1	Digitaria insularis	HIGH	0	0	NA	NA	NA	NA	Amazonas
330	1	Hypothyris ninonia	HIGH	0	0	NA	NA	NA	NA	Amazonas
331	1	Moenkhausia collettii	BAU	0	0	NA	NA	NA	NA	Amazonas
332	1	Habia fuscicauda	BAU	0	0	NA	Least Concern	1	NA	Amazonas
333	1	Hypocnemis hypoxantha	LOW	77071.8	77052.53	-0.0250026598574369	Least Concern	1	NA	Amazonas
334	1	Campephilus pollens	BAU	0	0	NA	Least Concern	1	NA	Amazonas
335	1	Palicourea demissa	BAU	79923.19	79912.42	-0.0134754381050157	NA	NA	NA	Amazonas
336	1	Rhizogonium lindigii	HIGH	61863.59	61801.79	-0.099897209327806	NA	NA	NA	Amazonas
337	1	Anhima cornuta	BAU	0	0	NA	Least Concern	1	NA	Amazonas
338	1	Anthurium andraeanum	HIGH	8526.53	8486.56	-0.468772173439854	NA	NA	NA	Amazonas
339	1	Symbiezidium transversale	LOW	20419.84	20397.27	-0.110529759292922	NA	NA	NA	Amazonas
340	1	Asplenium auritum	LOW	0	0	NA	NA	NA	NA	Amazonas
341	1	Adiantum raddianum	LOW	87292.62	87267.05	-0.0292922815239048	NA	NA	NA	Amazonas
342	1	Jabiru mycteria	HIGH	72881.14	72850.38	-0.0422057064420161	NA	NA	NA	Amazonas
343	1	Justicia pectoralis	HIGH	0	0	NA	NA	NA	NA	Amazonas
344	1	Miconia rosea	BAU	25496.28	25495.54	-0.00290238419094065	NA	NA	NA	Amazonas
345	1	Entada polystachya	LOW	63211.65	63190.48	-0.0334906619270313	NA	NA	NA	Amazonas
346	1	Desmodium tortuosum	HIGH	0	0	NA	NA	NA	NA	Amazonas
347	1	Pitcairnia heterophylla	BAU	0	0	NA	NA	NA	NA	Amazonas
348	1	Byrsonima spicata	BAU	0	0	NA	Least Concern	1	NA	Amazonas
349	1	Anthurium bakeri	BAU	43043.13	43041.92	-0.00281113385573755	NA	NA	NA	Amazonas
350	1	Costus arabicus	LOW	0	0	NA	NA	NA	NA	Amazonas
351	1	Alibertia hispida	BAU	98359.89	98323.43	-0.0370679552407047	NA	NA	NA	Amazonas
352	1	Stenospermation longipetiolatum	HIGH	0	0	NA	NA	NA	NA	Amazonas
353	1	Solanum confertiseriatum	BAU	104510.54	104471.03	-0.0378047994010889	NA	NA	NA	Amazonas
354	1	Holcus lanatus	BAU	69090.67	69086.6	-0.0058908098589758	NA	NA	NA	Amazonas
355	1	Senecio vulgaris	BAU	57668.67	57665.63	-0.00527149316951626	NA	NA	NA	Amazonas
356	1	Inga brachyrhachis	HIGH	89815.18	89750.69	-0.0718030070195157	Least Concern	1	NA	Amazonas
357	1	Espeletiopsis corymbosa	LOW	0	0	NA	NA	NA	NA	Amazonas
358	1	Heteromys australis	BAU	0	0	NA	Least Concern	1	NA	Amazonas
359	1	Crenicichla saxatilis	BAU	0	0	NA	NA	NA	NA	Amazonas
360	1	Annona cherimola	HIGH	0	0	NA	Least Concern	1	NA	Amazonas
361	1	Hyloxalus subpunctatus	HIGH	0	0	NA	Least Concern	1	1	Amazonas
362	1	Noteroclada confluens	BAU	53774.99	53773.05	-0.00360762503162725	NA	NA	NA	Amazonas
363	1	Miconia myriantha	LOW	0	0	NA	NA	NA	NA	Amazonas
364	1	Liophis melanotus	BAU	7747.08	7745.9	-0.0152315453048154	NA	NA	NA	Amazonas
365	1	Potamites ecpleopus	BAU	67561.59	67521.65	-0.0591164299123249	Least Concern	1	NA	Amazonas
366	1	Anthurium trinervium	LOW	0	0	NA	NA	NA	NA	Amazonas
367	1	Isopterygium tenerum	BAU	0	0	NA	NA	NA	NA	Amazonas
368	1	Calymperes lonchophyllum	BAU	0	0	NA	NA	NA	NA	Amazonas
369	1	Myrmotherula menetriesii	LOW	64395.26	64374.09	-0.0328750904957997	Least Concern	1	NA	Amazonas
370	1	Lejeunea flava	BAU	0	0	NA	NA	NA	NA	Amazonas
371	1	Sula leucogaster	BAU	68018.34	68014.5	-0.00564553618920501	NA	NA	NA	Amazonas
372	1	Heliconia aemygdiana	LOW	0	0	NA	NA	NA	NA	Amazonas
373	1	Miconia benthamiana	HIGH	63526.76	63495.41	-0.0493492820978097	NA	NA	NA	Amazonas
374	1	Trichilia hirta	BAU	27.79	27.61	-0.647715005397624	Least Concern	1	NA	Amazonas
375	1	Hirundinea ferruginea	LOW	0	0	NA	Least Concern	1	NA	Amazonas
376	1	Mechanitis lysimnia	LOW	0	0	NA	NA	NA	NA	Amazonas
377	1	Craugastor longirostris	BAU	0	0	NA	Least Concern	1	NA	Amazonas
378	1	Pristimantis frater	LOW	0	0	NA	Least Concern	1	1	Amazonas
379	1	Lozania klugii	HIGH	0	0	NA	NA	NA	NA	Amazonas
380	1	Psychotria herzogii	HIGH	0	0	NA	NA	NA	NA	Amazonas
381	1	Enterosora trifurcata	HIGH	60290.92	60233.17	-0.0957855677106934	NA	NA	NA	Amazonas
382	1	Boehmeria nivea	LOW	0	0	NA	NA	NA	NA	Amazonas
383	1	Sporophila luctuosa	HIGH	0	0	NA	NA	NA	NA	Amazonas
384	1	Palicourea rigidifolia	LOW	85287.36	85262.08	-0.0296409690720862	NA	NA	NA	Amazonas
385	1	Otoglossum globuliferum	BAU	0	0	NA	NA	NA	NA	Amazonas
386	1	Troglodytes solstitialis	LOW	30897.42	30862.17	-0.114087195629926	Least Concern	1	NA	Amazonas
387	1	Aechmea pubescens	BAU	0	0	NA	NA	NA	NA	Amazonas
388	1	Attalea maripa	HIGH	0	0	NA	NA	NA	NA	Amazonas
389	1	Anaxagorea brachycarpa	BAU	0	0	NA	Least Concern	1	NA	Amazonas
390	1	Centropogon loretensis	LOW	25571.67	25540.4	-0.122283761678439	NA	NA	NA	Amazonas
391	1	Hypsiboas crepitans	LOW	0	0	NA	NA	NA	NA	Amazonas
392	1	Melochia spicata	HIGH	0	0	NA	NA	NA	NA	Amazonas
393	1	Panicum pilosum	BAU	0	0	NA	NA	NA	NA	Amazonas
394	1	Cypseloides cherriei	HIGH	0	0	NA	Data Deficient	1	NA	Amazonas
395	1	Acaena ovalifolia	BAU	0	0	NA	NA	NA	NA	Amazonas
396	1	Leptodontium wallisii	LOW	0	0	NA	NA	NA	NA	Amazonas
397	1	Stachytarpheta cayennensis	HIGH	0	0	NA	NA	NA	NA	Amazonas
398	1	Gnaphalium antennarioides	LOW	0	0	NA	NA	NA	NA	Amazonas
399	1	Amazona mercenaria	LOW	37340.89	37324.8	-0.0430894925107476	NA	NA	NA	Amazonas
400	1	Chimarrhis gentryana	HIGH	0	0	NA	NA	NA	NA	Amazonas
401	1	Macromitrium punctatum	LOW	54378.78	54360.85	-0.0329724204919645	NA	NA	NA	Amazonas
402	1	Gonzalagunia cornifolia	LOW	95679.67	95649.55	-0.0314800416849215	NA	NA	NA	Amazonas
403	1	Bauhinia picta	HIGH	0	0	NA	NA	NA	NA	Amazonas
404	1	Psychotria trivialis	HIGH	0	0	NA	NA	NA	NA	Amazonas
405	1	Erycina pusilla	HIGH	68306.83	68236.13	-0.103503558868121	NA	NA	NA	Amazonas
406	1	Dictyostega orobanchoides	HIGH	6635.97	6634.83	-0.0171791011713484	NA	NA	NA	Amazonas
407	1	Clitoria javitensis	LOW	0	0	NA	NA	NA	NA	Amazonas
408	1	Philodendron sulcatum	HIGH	5080.37	5069.35	-0.216913335052359	NA	NA	NA	Amazonas
409	1	Iriartella setigera	BAU	86165.51	86142.31	-0.026924926226279	NA	NA	NA	Amazonas
410	1	Pityrogramma trifoliata	BAU	29105.84	29097.53	-0.0285509712140289	NA	NA	NA	Amazonas
411	1	Pristimantis palmeri	LOW	47331.81	47291.99	-0.0841294681103463	Least Concern	1	1	Amazonas
412	1	Acacia loretensis	HIGH	0	0	NA	NA	NA	NA	Amazonas
413	1	Icterus nigrogularis	HIGH	20004.85	19994.13	-0.0535870051512385	Least Concern	1	NA	Amazonas
414	1	Glaucis aeneus	BAU	92076.68	92066.76	-0.0107736291099964	Least Concern	1	NA	Amazonas
415	1	Rhynchocyclus olivaceus	LOW	0	0	NA	Least Concern	1	NA	Amazonas
416	1	Columbina squammata	HIGH	36482.42	36437.93	-0.121949147013816	NA	NA	NA	Amazonas
417	1	Bactris acanthocarpa	BAU	0	0	NA	NA	NA	NA	Amazonas
418	1	Anthurium kunthii	BAU	0	0	NA	NA	NA	NA	Amazonas
419	1	Annona cherimola	LOW	0	0	NA	Least Concern	1	NA	Amazonas
420	1	Sublegatus modestus	BAU	0	0	NA	Least Concern	1	NA	Amazonas
421	1	Attila spadiceus	BAU	0	0	NA	Least Concern	1	NA	Amazonas
422	1	Stelgidopteryx ruficollis	BAU	0	0	NA	Least Concern	1	NA	Amazonas
423	1	Miconia triplinervis	LOW	0	0	NA	Least Concern	1	NA	Amazonas
424	1	Momotus momota	HIGH	1713.53	1703.82	-0.566666472136469	Least Concern	1	NA	Amazonas
425	1	Syngonium macrophyllum	BAU	0	0	NA	NA	NA	NA	Amazonas
426	1	Anisognathus igniventris	LOW	6974.8	6949.56	-0.361874175603598	Least Concern	1	NA	Amazonas
427	1	Costus amazonicus	BAU	0	0	NA	NA	NA	NA	Amazonas
428	1	Jacamerops aureus	HIGH	0	0	NA	Least Concern	1	NA	Amazonas
429	1	Conostegia centronioides	BAU	0	0	NA	Least Concern	1	NA	Amazonas
430	1	Casearia decandra	BAU	1156.37	1154.89	-0.127986717054212	NA	NA	NA	Amazonas
431	1	Eschweilera andina	BAU	0	0	NA	Least Concern	1	NA	Amazonas
432	1	Leandra aristigera	LOW	0	0	NA	NA	NA	NA	Amazonas
433	1	Meliosma herbertii	BAU	49978.72	49976.43	-0.00458195007795492	NA	NA	NA	Amazonas
434	1	Pleurothallis coriacardia	LOW	12989.7	12981.8	-0.0608174168764595	NA	NA	NA	Amazonas
435	1	Anthurium cuspidatum	HIGH	41402.7	41392.41	-0.0248534515864753	NA	NA	NA	Amazonas
436	1	Phylloscartes ophthalmicus	BAU	0	0	NA	NA	NA	NA	Amazonas
437	1	Leporinus friderici	LOW	61496.63	61454.66	-0.0682476421878628	NA	NA	NA	Amazonas
438	1	Cochlidium serrulatum	HIGH	0	0	NA	NA	NA	NA	Amazonas
439	1	Tapera naevia	BAU	0	0	NA	NA	NA	NA	Amazonas
440	1	Asplenium formosum	HIGH	0	0	NA	Least Concern	1	NA	Amazonas
441	1	Taphrospilus hypostictus	LOW	0	0	NA	Least Concern	1	NA	Amazonas
442	1	Arundinicola leucocephala	HIGH	43197.39	43170.53	-0.0621796826150853	NA	NA	NA	Amazonas
443	1	Miconia oinochrophylla	BAU	0	0	NA	NA	NA	NA	Amazonas
444	1	Pouteria trilocularis	LOW	0	0	NA	Least Concern	1	NA	Amazonas
445	1	Anthurium oxybelium	HIGH	99210.85	99142.32	-0.0690751062005807	NA	NA	NA	Amazonas
446	1	Brachymyrmex pictus	HIGH	105272.59	105196.84	-0.0719560523779267	NA	NA	NA	Amazonas
447	1	Hydropsalis climacocerca	HIGH	2548.32	2547.88	-0.0172662773905967	NA	NA	NA	Amazonas
448	1	Pouteria oblanceolata	LOW	0	0	NA	Least Concern	1	NA	Amazonas
449	1	Diglossa sittoides	BAU	0	0	NA	Least Concern	1	NA	Amazonas
450	1	Dolichodelphys chlorocrater	BAU	94308.88	94297.68	-0.0118758700135254	NA	NA	NA	Amazonas
451	1	Impatiens walleriana	BAU	0	0	NA	NA	NA	NA	Amazonas
452	1	Oligoryzomys fulvescens	HIGH	79019.18	78986.83	-0.0409394276174358	Least Concern	1	NA	Amazonas
453	1	Ageratina glyptophlebia	LOW	565.23	565.13	-0.0176919130265596	NA	NA	NA	Amazonas
454	1	Chlorophanes spiza	LOW	93905.51	93853.64	-0.0552363753734955	Least Concern	1	NA	Amazonas
455	1	Didymodon laevigatus	HIGH	21999.16	21980.35	-0.0855032646701115	NA	NA	NA	Amazonas
456	1	Pachycondyla constricta	BAU	0	0	NA	NA	NA	NA	Amazonas
457	1	Grallaria milleri	HIGH	0	0	NA	Vulnerable	1	1	Amazonas
458	1	Cremastosperma cauliflorum	HIGH	0	0	NA	NA	NA	NA	Amazonas
459	1	Micrurus surinamensis	HIGH	0	0	NA	Least Concern	1	NA	Amazonas
460	1	Cordia alliodora	LOW	137.17	137.15	-0.0145804476197287	Least Concern	1	NA	Amazonas
461	1	Mandevilla hirsuta	LOW	22426.32	22420.04	-0.0280028109828043	NA	NA	NA	Amazonas
462	1	Tessaria integrifolia	BAU	0	0	NA	Least Concern	1	NA	Amazonas
463	1	Phyllanthus amarus	BAU	0	0	NA	NA	NA	NA	Amazonas
464	1	Aristolochia ringens	LOW	0	0	NA	NA	NA	NA	Amazonas
465	1	Crossomitrium patrisiae	HIGH	22449.92	22432.78	-0.0763477108158934	NA	NA	NA	Amazonas
466	1	Hirtella pilosissima	LOW	100397.12	100346.06	-0.050858032581012	Least Concern	1	NA	Amazonas
467	1	Tapinoma melanocephalum	HIGH	0	0	NA	NA	NA	NA	Amazonas
468	1	Micoureus regina	BAU	90219.92	90179.29	-0.0450344003851973	NA	NA	NA	Amazonas
469	1	Vigna caracalla	BAU	0	0	NA	NA	NA	NA	Amazonas
470	1	Baccharis buxifolia	BAU	0	0	NA	NA	NA	NA	Amazonas
471	1	Inga striata	BAU	42599.42	42597.4	-0.00474184859793114	Least Concern	1	NA	Amazonas
472	1	Epidendrum gastropodium	BAU	0	0	NA	NA	NA	NA	Amazonas
473	1	Ageratina tinifolia	LOW	0	0	NA	NA	NA	NA	Amazonas
474	1	Arthrostemma ciliatum	LOW	0	0	NA	NA	NA	NA	Amazonas
475	1	Conostegia montana	LOW	0	0	NA	Least Concern	1	NA	Amazonas
476	1	Buteogallus meridionalis	LOW	0	0	NA	Least Concern	1	NA	Amazonas
477	1	Astyanax integer	HIGH	53059.04	53029.49	-0.0556926774400798	NA	NA	1	Amazonas
478	1	Notharchus tectus	LOW	20477.01	20448.02	-0.141573403538886	Least Concern	1	NA	Amazonas
479	1	Rubus urticifolius	LOW	0	0	NA	NA	NA	NA	Amazonas
480	1	Palicourea sodiroi	HIGH	0	0	NA	NA	NA	NA	Amazonas
481	1	Chlorospingus canigularis	LOW	0	0	NA	Least Concern	1	NA	Amazonas
482	1	Erigeron primulifolium	HIGH	0	0	NA	NA	NA	NA	Amazonas
483	1	Sterna caspia	LOW	16519.39	16515.82	-0.0216109674751895	NA	NA	NA	Amazonas
484	1	Clelia clelia	HIGH	4547.51	4516.33	-0.685649949093027	Least Concern	1	NA	Amazonas
485	1	Piculus rubiginosus	LOW	0	0	NA	NA	NA	NA	Amazonas
486	1	Anemia phyllitidis	BAU	0	0	NA	NA	NA	NA	Amazonas
487	1	Guatteria elata	BAU	0	0	NA	Least Concern	1	NA	Amazonas
488	1	Chlorospatha croatiana	HIGH	96074.79	96037.89	-0.0384075780961834	NA	NA	NA	Amazonas
489	1	Cercomacra cinerascens	HIGH	77920.04	77851.8	-0.087576957096006	Least Concern	1	NA	Amazonas
490	1	Aiphanes simplex	LOW	105323.96	105268.62	-0.0525426503143359	NA	NA	NA	Amazonas
491	1	Crotalaria incana	BAU	17610.02	17578.86	-0.176944716701059	NA	NA	NA	Amazonas
492	1	Stipa ichu	BAU	43756.26	43753.68	-0.0058962991809669	NA	NA	NA	Amazonas
493	1	Psychotria florentina	HIGH	62860.59	62800.52	-0.0955606684569771	NA	NA	NA	Amazonas
494	1	Tibouchina urvilleana	LOW	37690.11	37682.96	-0.0189704938510433	NA	NA	NA	Amazonas
495	1	Gustavia augusta	BAU	28075.59	28055.76	-0.070630750769625	Least Concern	1	NA	Amazonas
496	1	Bolitoglossa adspersa	BAU	0	0	NA	Near Threatened	1	NA	Amazonas
497	1	Pouteria lucuma	HIGH	3509.83	3509.31	-0.0148155323762114	Least Concern	1	NA	Amazonas
498	1	Cinclodes excelsior	BAU	0	0	NA	Least Concern	1	NA	Amazonas
499	1	Psychotria tricolor	HIGH	0	0	NA	NA	NA	NA	Amazonas
500	1	Pouteria bilocularis	LOW	0	0	NA	Least Concern	1	NA	Amazonas
501	1	Dimerocostus strobilaceus	HIGH	0	0	NA	NA	NA	NA	Amazonas
502	1	Phyllomyias burmeisteri	HIGH	5683.23	5650.63	-0.573617467531658	Least Concern	1	NA	Amazonas
503	1	Anthurium verrucosum	HIGH	0	0	NA	NA	NA	NA	Amazonas
504	1	Nicotiana tabacum	LOW	0	0	NA	NA	NA	NA	Amazonas
505	1	Critoniopsis sodiroi	BAU	0	0	NA	Near Threatened	1	NA	Amazonas
506	1	Porotrichum korthalsianum	HIGH	0	0	NA	NA	NA	NA	Amazonas
507	1	Margaritopsis haematocarpa	BAU	0	0	NA	NA	NA	NA	Amazonas
508	1	Anthurium urbanii	LOW	0	0	NA	NA	NA	NA	Amazonas
509	1	Myrmoborus leucophrys	LOW	0	0	NA	Least Concern	1	NA	Amazonas
510	1	Cypseloides cherriei	LOW	0	0	NA	Data Deficient	1	NA	Amazonas
511	1	Cichlopsis leucogenys	HIGH	10947.88	10908.66	-0.358242874419516	Endangered	1	NA	Amazonas
512	1	Larosterna inca	BAU	0	0	NA	NA	NA	NA	Amazonas
513	1	Farlowella vittata	HIGH	0	0	NA	NA	NA	NA	Amazonas
514	1	Atlapetes melanocephalus	BAU	0	0	NA	Least Concern	1	1	Amazonas
515	1	Rhynchosia schomburgkii	LOW	96315.3	96286.26	-0.0301509728983953	NA	NA	NA	Amazonas
516	1	Jaltomata procumbens	BAU	0	0	NA	NA	NA	NA	Amazonas
517	1	Dendrocincla homochroa	HIGH	8201.29	8193.31	-0.0973017659417163	Least Concern	1	NA	Amazonas
518	1	Trichomanes elegans	HIGH	0	0	NA	NA	NA	NA	Amazonas
519	1	Eugenia patrisii	BAU	0	0	NA	Least Concern	1	NA	Amazonas
520	1	Pentacalia abietina	LOW	51583.13	51567.32	-0.0306495553875805	NA	NA	NA	Amazonas
521	1	Carica papaya	BAU	73430.98	73391.18	-0.0542005567677333	Data Deficient	1	NA	Amazonas
522	1	Oporornis agilis	LOW	56070.27	56025.03	-0.080684469684198	Least Concern	1	NA	Amazonas
523	1	Miconia decurrens	BAU	0	0	NA	Least Concern	1	NA	Amazonas
524	1	Rigodium toxarion	BAU	0	0	NA	NA	NA	NA	Amazonas
525	1	Bathysa obovata	LOW	0	0	NA	NA	NA	NA	Amazonas
526	1	Arremon aurantiirostris	BAU	0	0	NA	Least Concern	1	NA	Amazonas
527	1	Peperomia urocarpa	BAU	0	0	NA	NA	NA	NA	Amazonas
528	1	Solanum leptopodum	BAU	0	0	NA	NA	NA	NA	Amazonas
529	1	Amazilia viridigaster	LOW	0	0	NA	Least Concern	1	NA	Amazonas
530	1	Solanum cordovense	LOW	0	0	NA	Least Concern	1	NA	Amazonas
531	1	Rostrhamus sociabilis	HIGH	6382.97	6381.84	-0.0177033575279237	NA	NA	NA	Amazonas
532	1	Pitcairnia brittoniana	LOW	0	0	NA	NA	NA	NA	Amazonas
533	1	Parodon apolinari	BAU	0	0	NA	NA	NA	NA	Amazonas
534	1	Miconia hymenanthera	HIGH	0	0	NA	NA	NA	NA	Amazonas
535	1	Bolitoglossa adspersa	LOW	0	0	NA	Near Threatened	1	NA	Amazonas
536	1	Rhodospingus cruentus	LOW	65792.21	65753.39	-0.0590039459078924	Least Concern	1	NA	Amazonas
537	1	Annona edulis	LOW	0	0	NA	NA	NA	NA	Amazonas
538	1	Miconia lonchophylla	HIGH	4027.43	4026.79	-0.0158910272804213	NA	NA	NA	Amazonas
539	1	Anthurium rugulosum	BAU	0	0	NA	Least Concern	1	NA	Amazonas
540	1	Inga pruriens	BAU	0	0	NA	Least Concern	1	NA	Amazonas
541	1	Melinis repens	HIGH	0	0	NA	NA	NA	NA	Amazonas
542	1	Harpagus bidentatus	HIGH	0	0	NA	Least Concern	1	NA	Amazonas
543	1	Prescottia stachyodes	HIGH	0	0	NA	NA	NA	NA	Amazonas
544	1	Cladonia didyma	HIGH	53446.85	53399.47	-0.0886488165345523	NA	NA	NA	Amazonas
545	1	Pharomachrus pavoninus	LOW	0	0	NA	Least Concern	1	NA	Amazonas
546	1	Tangara inornata	HIGH	0	0	NA	Least Concern	1	NA	Amazonas
547	1	Hieronyma alchorneoides	HIGH	0	0	NA	Least Concern	1	NA	Amazonas
548	1	Vultur gryphus	BAU	0	0	NA	NA	NA	NA	Amazonas
549	1	Heliconia episcopalis	HIGH	21698.89	21672.1	-0.123462536562934	NA	NA	NA	Amazonas
550	1	Lonchura malacca	HIGH	0	0	NA	Least Concern	1	NA	Amazonas
551	1	Galictis vittata	LOW	858.42	858.31	-0.0128142401155627	Least Concern	1	NA	Amazonas
552	1	Osteocephalus leprieurii	LOW	0	0	NA	Least Concern	1	NA	Amazonas
553	1	Ixora panurensis	LOW	61674.05	61656.7	-0.0281317669262937	NA	NA	NA	Amazonas
554	1	Sarcoramphus papa	HIGH	29.02	29	-0.0689179875947608	Least Concern	1	NA	Amazonas
555	1	Carapa guianensis	HIGH	52343.2	52294.62	-0.0928105274419494	Least Concern	1	NA	Amazonas
556	1	Phaethornis yaruqui	HIGH	0	0	NA	Least Concern	1	NA	Amazonas
557	1	Gonzalagunia dependens	BAU	92643.31	92629.48	-0.0149282230956577	NA	NA	NA	Amazonas
558	1	Leptotila plumbeiceps	BAU	0	0	NA	Least Concern	1	NA	Amazonas
559	1	Syngonium podophyllum	BAU	73094.71	73054.6	-0.0548740120865116	NA	NA	NA	Amazonas
560	1	Melanerpes chrysauchen	LOW	0	0	NA	Least Concern	1	NA	Amazonas
561	1	Asplenium formosum	BAU	0	0	NA	Least Concern	1	NA	Amazonas
562	1	Crypturellus obsoletus	HIGH	71996	71963.21	-0.0455441968998189	Least Concern	1	NA	Amazonas
563	1	Spermacoce ocymifolia	LOW	0	0	NA	NA	NA	NA	Amazonas
564	1	Buteogallus urubitinga	HIGH	93875.75	93802.97	-0.0775280090971298	Least Concern	1	NA	Amazonas
565	1	Microglanis poecilus	HIGH	7931.07	7916.34	-0.185725255230373	NA	NA	NA	Amazonas
566	1	Zungaro zungaro	HIGH	0	0	NA	NA	NA	NA	Amazonas
567	1	Piper aequale	HIGH	0	0	NA	Least Concern	1	NA	Amazonas
568	1	Hypotrachyna physcioides	HIGH	0	0	NA	NA	NA	NA	Amazonas
569	1	Solanum thelopodium	BAU	0	0	NA	Least Concern	1	NA	Amazonas
570	1	Pentacalia oronocensis	LOW	0	0	NA	NA	NA	NA	Amazonas
571	1	Achyrocline satureioides	LOW	0	0	NA	NA	NA	NA	Amazonas
572	1	Brassica rapa	LOW	0	0	NA	NA	NA	NA	Amazonas
573	1	Dolospingus fringilloides	BAU	0	0	NA	NA	NA	NA	Amazonas
574	1	Frullanoides densifolia	HIGH	0	0	NA	NA	NA	NA	Amazonas
575	1	Pouteria bangii	HIGH	28375.82	28331.99	-0.1544624965904	Least Concern	1	NA	Amazonas
576	1	Phlegopsis nigromaculata	HIGH	105310.44	105233.57	-0.0729937126841321	Least Concern	1	NA	Amazonas
577	1	Pardirallus nigricans	BAU	0	0	NA	NA	NA	NA	Amazonas
578	1	Schkuhria pinnata	BAU	0	0	NA	NA	NA	NA	Amazonas
579	1	Basileuterus tristriatus	LOW	89231.09	89185.36	-0.0512489536998774	Least Concern	1	NA	Amazonas
580	1	Cyphocharax festivus	BAU	0	0	NA	NA	NA	NA	Amazonas
581	1	Ramphocaenus melanurus	LOW	0	0	NA	Least Concern	1	NA	Amazonas
582	1	Passiflora suberosa	HIGH	68832.49	68814.79	-0.0257146007648592	NA	NA	NA	Amazonas
583	1	Caryocar microcarpum	LOW	0	0	NA	NA	NA	NA	Amazonas
584	1	Acromyrmex octospinosus	LOW	0	0	NA	NA	NA	NA	Amazonas
585	1	Miconia micropetala	HIGH	37947	37940.19	-0.017946082694278	NA	NA	NA	Amazonas
586	1	Diglossa sittoides	LOW	0	0	NA	Least Concern	1	NA	Amazonas
587	1	Echinochloa colona	LOW	0	0	NA	NA	NA	NA	Amazonas
588	1	Tillandsia denudata	HIGH	7084.85	7083.58	-0.0179255735830743	NA	NA	NA	Amazonas
589	1	Solanum acuminatum	HIGH	39660.69	39636.19	-0.0617740135131285	NA	NA	NA	Amazonas
590	1	Oophaga histrionica	BAU	0	0	NA	Critically Endangered	1	NA	Amazonas
591	1	Miconia rufescens	LOW	0	0	NA	NA	NA	NA	Amazonas
592	1	Coffea arabica	HIGH	0	0	NA	Endangered	1	NA	Amazonas
593	1	Tangara larvata	LOW	0	0	NA	Least Concern	1	NA	Amazonas
594	1	Triumfetta lappula	LOW	88579.89	88527.53	-0.0591104820744309	Least Concern	1	NA	Amazonas
595	1	Picumnus pumilus	HIGH	0	0	NA	Least Concern	1	NA	Amazonas
596	1	Psychotria mapourioides	LOW	0	0	NA	Least Concern	1	NA	Amazonas
597	1	Hippobroma longiflora	HIGH	0	0	NA	NA	NA	NA	Amazonas
598	1	Oreochromis mossambicus	LOW	87687.95	87635.74	-0.0595406780521062	NA	NA	NA	Amazonas
599	1	Verbesina arborea	HIGH	0	0	NA	NA	NA	NA	Amazonas
600	1	Phaethornis longirostris	LOW	731.36	731.21	-0.0205097352876801	Least Concern	1	NA	Amazonas
601	1	Tecoma stans	HIGH	0	0	NA	Least Concern	1	NA	Amazonas
602	1	Asplenium juglandifolium	HIGH	0	0	NA	NA	NA	NA	Amazonas
603	1	Chalybura buffonii	BAU	69227.03	69188.4	-0.0558019028116686	Least Concern	1	NA	Amazonas
604	1	Lophotriccus galeatus	HIGH	0	0	NA	Least Concern	1	NA	Amazonas
605	1	Crotalaria retusa	HIGH	0	0	NA	NA	NA	NA	Amazonas
606	1	Diplazium striatum	LOW	0	0	NA	NA	NA	NA	Amazonas
607	1	Piper marginatum	BAU	0	0	NA	NA	NA	NA	Amazonas
608	1	Rottboellia cochinchinensis	LOW	63475.8	63454.54	-0.0334930792522537	NA	NA	NA	Amazonas
609	1	Hyptis mutabilis	HIGH	103702.07	103628.93	-0.0705289682260093	NA	NA	NA	Amazonas
610	1	Lupinus bogotensis	BAU	77953.21	77946.72	-0.00832550705738127	Least Concern	1	NA	Amazonas
611	1	Lindernia diffusa	LOW	0	0	NA	NA	NA	NA	Amazonas
612	1	Norops tropidogaster	HIGH	0	0	NA	NA	NA	NA	Amazonas
613	1	Campephilus pollens	HIGH	0	0	NA	Least Concern	1	NA	Amazonas
614	1	Inga pezizifera	HIGH	0	0	NA	Least Concern	1	NA	Amazonas
615	1	Pachyramphus marginatus	BAU	0	0	NA	Least Concern	1	NA	Amazonas
616	1	Steindachnerina guentheri	HIGH	38955.52	38941.17	-0.0368368847341751	NA	NA	NA	Amazonas
617	1	Kyllinga odorata	LOW	30352.9	30320.57	-0.106513710386822	NA	NA	NA	Amazonas
618	1	Prunus debilis	HIGH	93377.72	93341.68	-0.0385959305924456	Least Concern	1	NA	Amazonas
619	1	Calymperes lonchophyllum	HIGH	0	0	NA	NA	NA	NA	Amazonas
620	1	Heliconia curtispatha	HIGH	0	0	NA	NA	NA	NA	Amazonas
621	1	Myrcianthes rhopaloides	HIGH	0	0	NA	Least Concern	1	NA	Amazonas
622	1	Campephilus pollens	LOW	0	0	NA	Least Concern	1	NA	Amazonas
623	1	Psychotria racemosa	BAU	0	0	NA	NA	NA	NA	Amazonas
624	1	Leucopternis albicollis	BAU	0	0	NA	NA	NA	NA	Amazonas
625	1	Solanum clathratum	LOW	0	0	NA	Least Concern	1	NA	Amazonas
626	1	Pharus parvifolius	BAU	0	0	NA	NA	NA	NA	Amazonas
627	1	Circus buffoni	BAU	0	0	NA	NA	NA	NA	Amazonas
628	1	Urochroa bougueri	BAU	104923.4	104882.43	-0.039047533724604	Least Concern	1	NA	Amazonas
629	1	Hypsiboas boans	HIGH	72992.41	72959.43	-0.0451827799630269	NA	NA	NA	Amazonas
630	1	Inga thibaudiana	LOW	0	0	NA	Least Concern	1	NA	Amazonas
631	1	Calidris bairdii	LOW	94727.27	94699.02	-0.0298224576724316	NA	NA	NA	Amazonas
632	1	Stereophyllum radiculosum	BAU	0	0	NA	NA	NA	NA	Amazonas
633	1	Caenolestes fuliginosus	BAU	9778.52	9767.12	-0.116582059452756	Least Concern	1	NA	Amazonas
634	1	Tithorea tarricina	HIGH	0	0	NA	NA	NA	NA	Amazonas
635	1	Cardinalis phoeniceus	LOW	0	0	NA	NA	NA	NA	Amazonas
636	1	Norops sulcifrons	BAU	0	0	NA	NA	NA	NA	Amazonas
637	1	Myrmotherula longicauda	BAU	86447.14	86406.62	-0.0468725743847675	Least Concern	1	NA	Amazonas
638	1	Mimosa pudica	HIGH	3669.84	3658.61	-0.306007891352212	Least Concern	1	NA	Amazonas
639	1	Inga stenoptera	LOW	0	0	NA	Least Concern	1	NA	Amazonas
640	1	Couepia obovata	BAU	0	0	NA	NA	NA	NA	Amazonas
641	1	Hieronyma huilensis	LOW	0	0	NA	Least Concern	1	NA	Amazonas
642	1	Anthurium rotundatum	LOW	0	0	NA	NA	NA	NA	Amazonas
643	1	Rynchops niger	HIGH	0	0	NA	NA	NA	NA	Amazonas
644	1	Podocnemis vogli	LOW	0	0	NA	NA	NA	NA	Amazonas
645	1	Sagittaria guayanensis	HIGH	68547.01	68512.97	-0.0496593505683087	NA	NA	NA	Amazonas
646	1	Psilotum nudum	BAU	2533.13	2519.26	-0.547543947606317	NA	NA	NA	Amazonas
647	1	Maprounea guianensis	LOW	103207.55	103155.03	-0.0508877499756598	NA	NA	NA	Amazonas
648	1	Baccharis chilco	LOW	0	0	NA	NA	NA	NA	Amazonas
649	1	Scytalopus femoralis	HIGH	83436.1	83377.53	-0.070197432526217	Least Concern	1	NA	Amazonas
650	1	Medicago polymorpha	LOW	3112.72	3112.21	-0.0163843840756561	NA	NA	NA	Amazonas
651	1	Guzmania testudinis	HIGH	0	0	NA	NA	NA	NA	Amazonas
652	1	Ipomoea quamoclit	BAU	24335.72	24333.89	-0.00751981038572825	NA	NA	NA	Amazonas
653	1	Tibouchina gracilis	HIGH	0	0	NA	NA	NA	NA	Amazonas
654	1	Cochlearius cochlearius	BAU	0	0	NA	Least Concern	1	NA	Amazonas
655	1	Huperzia reflexa	LOW	0	0	NA	NA	NA	NA	Amazonas
656	1	Moenkhausia lepidura	BAU	0	0	NA	NA	NA	NA	Amazonas
657	1	Geotrygon frenata	LOW	27201.88	27171.41	-0.112014316657529	NA	NA	NA	Amazonas
658	1	Asplenium serratum	LOW	0	0	NA	NA	NA	NA	Amazonas
659	1	Anacroneuria quilla	HIGH	75672.81	75621.54	-0.0677522084881004	NA	NA	NA	Amazonas
660	1	Psychotria herzogii	LOW	0	0	NA	NA	NA	NA	Amazonas
661	1	Pitcairnia trianae	LOW	89595.46	89569.04	-0.0294881012944326	NA	NA	NA	Amazonas
662	1	Anthurium testaceum	HIGH	89088.05	89016.79	-0.0799882812565875	NA	NA	NA	Amazonas
663	1	Caladium bicolor	BAU	49700.1	49663.05	-0.0745471337079717	NA	NA	NA	Amazonas
664	1	Haplophaedia aureliae	HIGH	0	0	NA	Least Concern	1	NA	Amazonas
665	1	Campylopus pilifer	BAU	91628.98	91620.3	-0.00947298551178133	NA	NA	NA	Amazonas
666	1	Alchornea discolor	BAU	0	0	NA	NA	NA	NA	Amazonas
667	1	Perama galioides	HIGH	105310.44	105233.57	-0.0729937126841321	NA	NA	NA	Amazonas
668	1	Pouteria torta	BAU	100884.54	100858.73	-0.0255837019230079	NA	NA	NA	Amazonas
669	1	Anoda cristata	BAU	41587.81	41586.49	-0.00317400699868473	NA	NA	NA	Amazonas
670	1	Aiphanes hirsuta	HIGH	0	0	NA	NA	NA	NA	Amazonas
671	1	Heliconia psittacorum	HIGH	0	0	NA	NA	NA	NA	Amazonas
672	1	Chromolaena leptocephala	HIGH	82820.11	82764.87	-0.0666987764203709	NA	NA	NA	Amazonas
673	1	Stenospermation amomifolium	HIGH	0	0	NA	NA	NA	NA	Amazonas
674	1	Gonatodes concinnatus	LOW	0	0	NA	Least Concern	1	NA	Amazonas
675	1	Pseudocrossidium replicatum	BAU	69044.18	69005.66	-0.0557903649518171	NA	NA	NA	Amazonas
676	1	Epidendrum gastropodium	LOW	0	0	NA	NA	NA	NA	Amazonas
677	1	Palicourea tunjaensis	LOW	0	0	NA	NA	NA	NA	Amazonas
678	1	Arthrostemma ciliatum	BAU	0	0	NA	NA	NA	NA	Amazonas
679	1	Bomarea pauciflora	HIGH	0	0	NA	NA	NA	NA	Amazonas
680	1	Cyanocorax yncas	HIGH	67233.03	67173.75	-0.0881709481188024	Least Concern	1	NA	Amazonas
681	1	Diplazium cristatum	HIGH	61308.52	61269.46	-0.0637105576843115	NA	NA	NA	Amazonas
682	1	Turdus fuscater	HIGH	0	0	NA	Least Concern	1	NA	Amazonas
683	1	Inezia tenuirostris	HIGH	0	0	NA	Least Concern	1	NA	Amazonas
684	1	Ludwigia leptocarpa	BAU	0	0	NA	NA	NA	NA	Amazonas
685	1	Catharus fuscater	HIGH	0	0	NA	Least Concern	1	NA	Amazonas
686	1	Myrsine coriacea	LOW	0	0	NA	NA	NA	NA	Amazonas
687	1	Euphonia rufiventris	HIGH	83091.65	83059.12	-0.0391495415002577	Least Concern	1	NA	Amazonas
688	1	Anthurium panamense	BAU	0	0	NA	NA	NA	NA	Amazonas
689	1	Sporophila caerulescens	HIGH	79908.17	79874.14	-0.042586383845355	NA	NA	NA	Amazonas
690	1	Molothrus bonariensis	LOW	68857.36	68814.43	-0.0623462764183924	Least Concern	1	NA	Amazonas
691	1	Moenkhausia lepidura	LOW	0	0	NA	NA	NA	NA	Amazonas
692	1	Sturnira lilium	LOW	0	0	NA	Least Concern	1	NA	Amazonas
693	1	Adiantum macrophyllum	HIGH	88614.84	88589.51	-0.0285843770637082	NA	NA	NA	Amazonas
694	1	Aglaiocercus kingii	LOW	0	0	NA	Least Concern	1	NA	Amazonas
695	1	Chlorostilbon melanorhynchus	HIGH	0	0	NA	NA	NA	NA	Amazonas
696	1	Eupatorium inulifolium	HIGH	44716.81	44655.97	-0.13605621689024	NA	NA	NA	Amazonas
697	1	Lanio fulvus	BAU	0	0	NA	Least Concern	1	NA	Amazonas
698	1	Psychotria hazenii	HIGH	0	0	NA	NA	NA	NA	Amazonas
699	1	Eichhornia crassipes	LOW	72579.17	72534.92	-0.0609679058054811	NA	NA	NA	Amazonas
700	1	Psychotria stenostachya	LOW	0	0	NA	NA	NA	NA	Amazonas
701	1	Platyrinchus coronatus	BAU	0	0	NA	Least Concern	1	NA	Amazonas
702	1	Trifolium repens	LOW	38474.01	38457.98	-0.0416644898725109	NA	NA	NA	Amazonas
703	1	Cyperus prolixus	HIGH	42456.4	42443.25	-0.0309729510745175	NA	NA	NA	Amazonas
704	1	Formicarius colma	HIGH	72.07	72.05	-0.0277507978354322	Least Concern	1	NA	Amazonas
705	1	Dialium guianense	HIGH	0	0	NA	Least Concern	1	NA	Amazonas
706	1	Phaetusa simplex	BAU	0	0	NA	NA	NA	NA	Amazonas
707	1	Condylidium iresinoides	BAU	80965.84	80961.09	-0.00586667167289316	NA	NA	NA	Amazonas
708	1	Epidendrum rigidum	HIGH	93415.45	93379.76	-0.0382056715457693	NA	NA	NA	Amazonas
709	1	Myrcianthes orthostemon	BAU	0	0	NA	Least Concern	1	NA	Amazonas
710	1	Rosenbergiodendron formosum	LOW	0	0	NA	Least Concern	1	NA	Amazonas
711	1	Stylosanthes guianensis	HIGH	0	0	NA	NA	NA	NA	Amazonas
712	1	Hedwigidium integrifolium	LOW	0	0	NA	NA	NA	NA	Amazonas
713	1	Solanum laevigatum	BAU	90693.14	90653.26	-0.0439724548075021	NA	NA	NA	Amazonas
714	1	Inga ruiziana	BAU	0	0	NA	Least Concern	1	NA	Amazonas
715	1	Annona montana	HIGH	0	0	NA	NA	NA	NA	Amazonas
716	1	Ageratum conyzoides	BAU	76233.07	76193.44	-0.0519853129357176	NA	NA	NA	Amazonas
717	1	Tonina fluviatilis	BAU	0	0	NA	NA	NA	NA	Amazonas
718	1	Crossomitrium patrisiae	BAU	22489.26	22488.2	-0.00471336095539681	NA	NA	NA	Amazonas
719	1	Solanum dolosum	LOW	0	0	NA	NA	NA	NA	Amazonas
720	1	Echinosaura horrida	BAU	105223.2	105182.23	-0.0389362802119696	Least Concern	1	NA	Amazonas
721	1	Baryphthengus martii	LOW	0	0	NA	Least Concern	1	NA	Amazonas
722	1	Laterallus albigularis	BAU	0	0	NA	NA	NA	NA	Amazonas
723	1	Penelope purpurascens	HIGH	3812.45	3810.4	-0.0537711969992977	Least Concern	1	NA	Amazonas
724	1	Aristida adscensionis	BAU	0	0	NA	NA	NA	NA	Amazonas
725	1	Norops fuscoauratus	BAU	81309.74	81270.46	-0.0483090955646874	NA	NA	NA	Amazonas
726	1	Crotalaria pilosa	BAU	105350.29	105309.33	-0.0388798170370408	NA	NA	NA	Amazonas
727	1	Deroptyus accipitrinus	BAU	0	0	NA	Least Concern	1	NA	Amazonas
728	1	Bangsia melanochlamys	HIGH	0	0	NA	Vulnerable	1	1	Amazonas
729	1	Bactris setulosa	BAU	0	0	NA	NA	NA	NA	Amazonas
730	1	Philodendron barrosoanum	LOW	0	0	NA	NA	NA	NA	Amazonas
731	1	Bathysa bracteosa	LOW	70145.63	70105.88	-0.0566678209319668	NA	NA	NA	Amazonas
732	1	Lepidopyga coeruleogularis	BAU	82403.55	82364.46	-0.0474372766707217	Least Concern	1	NA	Amazonas
733	1	Elaeagia myriantha	HIGH	0	0	NA	Least Concern	1	NA	Amazonas
734	1	Rhynchospora corymbosa	LOW	0	0	NA	NA	NA	NA	Amazonas
735	1	Hypotrachyna imbricatula	HIGH	98616.08	98542.53	-0.0745821573925904	NA	NA	NA	Amazonas
736	1	Trixis inula	BAU	26379.95	26345.72	-0.129757637903027	Least Concern	1	NA	Amazonas
737	1	Cipura paludosa	HIGH	2655.8	2638.26	-0.660441298290533	NA	NA	NA	Amazonas
738	1	Octostruma balzani	BAU	0	0	NA	NA	NA	NA	Amazonas
739	1	Olyras crathis	LOW	0	0	NA	NA	NA	NA	Amazonas
740	1	Euphonia musica	LOW	0	0	NA	Least Concern	1	NA	Amazonas
741	1	Palicourea mansoana	HIGH	0	0	NA	Least Concern	1	NA	Amazonas
742	1	Xenopipo atronitens	BAU	0	0	NA	Least Concern	1	NA	Amazonas
743	1	Phaethornis malaris	BAU	0	0	NA	Least Concern	1	NA	Amazonas
744	1	Buchenavia tetraphylla	LOW	0	0	NA	NA	NA	NA	Amazonas
745	1	Sphagnum limbatum	HIGH	0	0	NA	NA	NA	NA	Amazonas
746	1	Cathartes melambrotus	HIGH	0	0	NA	Least Concern	1	NA	Amazonas
747	1	Polytrichadelphus purpureus	HIGH	65900.29	65846.61	-0.0814563941979512	NA	NA	NA	Amazonas
748	1	Tangara mexicana	LOW	0	0	NA	Least Concern	1	NA	Amazonas
749	1	Schistocarpha sinforosi	BAU	0	0	NA	NA	NA	NA	Amazonas
750	1	Ischnosiphon inflatus	HIGH	0	0	NA	NA	NA	NA	Amazonas
751	1	Cinnycerthia peruana	HIGH	0	0	NA	Least Concern	1	NA	Amazonas
752	1	Turdus hauxwelli	HIGH	0	0	NA	Least Concern	1	NA	Amazonas
753	1	Solanum sessiliflorum	BAU	8626.52	8601.82	-0.286326351761785	NA	NA	NA	Amazonas
754	1	Nymphargus griffithsi	LOW	0	0	NA	Least Concern	1	NA	Amazonas
755	1	Dorymyrmex biconis	HIGH	0	0	NA	NA	NA	NA	Amazonas
756	1	Pheucticus ludovicianus	HIGH	75024.5	74961.99	-0.0833194489799929	Least Concern	1	NA	Amazonas
757	1	Schkuhria pinnata	LOW	0	0	NA	NA	NA	NA	Amazonas
758	1	Parkinsonia praecox	HIGH	3528.85	3523.24	-0.158975303569155	NA	NA	NA	Amazonas
759	1	Miconia caudata	HIGH	7563.96	7526.76	-0.491805879459963	Least Concern	1	NA	Amazonas
760	1	Forpus modestus	LOW	31377.9	31363.13	-0.0470713463934821	Least Concern	1	NA	Amazonas
761	1	Ipomoea hederifolia	BAU	0	0	NA	NA	NA	NA	Amazonas
762	1	Forbestra equicola	BAU	0	0	NA	NA	NA	NA	Amazonas
763	1	Pionus fuscus	BAU	90689.1	90648.54	-0.0447242281597372	Least Concern	1	NA	Amazonas
764	1	Psarocolius wagleri	BAU	60978.13	60975.24	-0.00473940411094833	Least Concern	1	NA	Amazonas
765	1	Chlorospingus semifuscus	LOW	0	0	NA	Least Concern	1	NA	Amazonas
766	1	Picumnus exilis	LOW	0	0	NA	Least Concern	1	NA	Amazonas
767	1	Trachycephalus venulosus	BAU	94020.84	93981.08	-0.0422884968906838	NA	NA	NA	Amazonas
768	1	Anthurium trinervium	BAU	0	0	NA	NA	NA	NA	Amazonas
769	1	Cephalotes spinosus	LOW	0	0	NA	NA	NA	NA	Amazonas
770	1	Desmodium adscendens	HIGH	0	0	NA	Least Concern	1	NA	Amazonas
771	1	Scarthyla vigilans	LOW	0	0	NA	NA	NA	NA	Amazonas
772	1	Dendroica petechia	HIGH	55959.96	55917.6	-0.0756969804839042	NA	NA	NA	Amazonas
773	1	Parodiolyra lateralis	LOW	517.15	513.83	-0.64198008314801	NA	NA	NA	Amazonas
774	1	Epidendrum nocturnum	HIGH	97713.91	97676.19	-0.0386024876089813	NA	NA	NA	Amazonas
775	1	Psychotria zevallosii	BAU	0	0	NA	NA	NA	NA	Amazonas
776	1	Sais paraensis	HIGH	0	0	NA	NA	NA	NA	Amazonas
777	1	Urtica urens	HIGH	0	0	NA	NA	NA	NA	Amazonas
778	1	Pleurothallis bivalvis	BAU	102043.92	102003.09	-0.0400121829894439	NA	NA	NA	Amazonas
779	1	Licania caudata	BAU	4170.97	4154.27	-0.400386480842581	NA	NA	NA	Amazonas
780	1	Oyedaea verbesinoides	LOW	0	0	NA	Least Concern	1	NA	Amazonas
781	1	Smilax spinosa	BAU	0	0	NA	NA	NA	NA	Amazonas
782	1	Anthurium ravenii	LOW	0	0	NA	NA	NA	NA	Amazonas
783	1	Acmella brachyglossa	HIGH	0	0	NA	NA	NA	NA	Amazonas
784	1	Brunfelsia chiricaspi	BAU	0	0	NA	NA	NA	NA	Amazonas
785	1	Phyllostomus elongatus	BAU	0	0	NA	Least Concern	1	NA	Amazonas
786	1	Ferdinandusa chlorantha	LOW	0	0	NA	Least Concern	1	NA	Amazonas
787	1	Solanum aureum	BAU	0	0	NA	NA	NA	NA	Amazonas
788	1	Seiurus noveboracensis	LOW	41.92	41.69	-0.548664122137414	NA	NA	NA	Amazonas
789	1	Desmodium uncinatum	BAU	0	0	NA	NA	NA	NA	Amazonas
790	1	Tiaris obscurus	HIGH	0	0	NA	NA	NA	NA	Amazonas
791	1	Faramea ampla	LOW	21371.82	21359.12	-0.0594240453082645	NA	NA	NA	Amazonas
792	1	Sturnella militaris	LOW	27165.79	27134.96	-0.113488324837974	NA	NA	NA	Amazonas
793	1	Festuca procera	LOW	0	0	NA	NA	NA	NA	Amazonas
794	1	Campyloneurum phyllitidis	BAU	99453.69	99412.84	-0.0410743935192408	NA	NA	NA	Amazonas
795	1	Acisanthera quadrata	BAU	0	0	NA	NA	NA	NA	Amazonas
796	1	Psychotria microbotrys	BAU	0	0	NA	NA	NA	NA	Amazonas
797	1	Lepidocolaptes souleyetii	LOW	65.22	65.07	-0.229990800367994	Least Concern	1	NA	Amazonas
798	1	Pouzolzia occidentalis	BAU	0	0	NA	NA	NA	NA	Amazonas
799	1	Senna macrophylla	HIGH	126.57	122.72	-3.04179505412025	Least Concern	1	NA	Amazonas
800	1	Psychotria mapourioides	HIGH	0	0	NA	Least Concern	1	NA	Amazonas
801	1	Dichrozona cincta	BAU	32332.5	32327.59	-0.0151859584009893	Least Concern	1	NA	Amazonas
802	1	Spathiphyllum cannifolium	HIGH	79738.34	79686.34	-0.0652132963891649	NA	NA	NA	Amazonas
803	1	Erythrophyllastrum andinum	LOW	0	0	NA	NA	NA	NA	Amazonas
804	1	Hesperomeles ferruginea	LOW	0	0	NA	NA	NA	NA	Amazonas
805	1	Petiveria alliacea	HIGH	0	0	NA	NA	NA	NA	Amazonas
806	1	Iridophanes pulcherrimus	BAU	0	0	NA	Least Concern	1	NA	Amazonas
807	1	Heliconia schumanniana	HIGH	0	0	NA	NA	NA	NA	Amazonas
808	1	Pecluma pectinata	LOW	103889.1	103836.29	-0.0508330517831151	NA	NA	NA	Amazonas
809	1	Molothrus bonariensis	BAU	68875.12	68835.42	-0.0576405529311558	Least Concern	1	NA	Amazonas
810	1	Scytalopus atratus	BAU	0	0	NA	Least Concern	1	NA	Amazonas
811	1	Capito squamatus	BAU	75184.98	75180.91	-0.0054133152658848	Near Threatened	1	NA	Amazonas
812	1	Faramea suerrensis	HIGH	65748.52	65699.1	-0.0751651900301303	Least Concern	1	NA	Amazonas
813	1	Solanum mite	LOW	0	0	NA	NA	NA	NA	Amazonas
814	1	Polystachya foliosa	LOW	90061.32	90015.86	-0.0504767196394705	NA	NA	NA	Amazonas
815	1	Justicia secunda	LOW	0	0	NA	NA	NA	NA	Amazonas
816	1	Pimelodus blochii	BAU	45091.4	45089.02	-0.0052781683425324	NA	NA	NA	Amazonas
817	1	Pionopsitta pyrilia	HIGH	0	0	NA	NA	NA	NA	Amazonas
818	1	Parkia igneiflora	BAU	63977.84	63941.03	-0.0575355466830354	Least Concern	1	NA	Amazonas
819	1	Anemia hirsuta	LOW	24219.61	24188.6	-0.12803674377912	NA	NA	NA	Amazonas
820	1	Columba livia	BAU	0	0	NA	NA	NA	NA	Amazonas
821	1	Brownea ariza	LOW	0	0	NA	NA	NA	NA	Amazonas
822	1	Cyclanthus bipartitus	BAU	63950.23	63924.03	-0.0409693600789307	NA	NA	NA	Amazonas
823	1	Lachemilla hispidula	HIGH	26645.4	26596.43	-0.18378406779407	NA	NA	NA	Amazonas
824	1	Cebus capucinus	LOW	36308.71	36274.37	-0.0945778574892815	NA	NA	NA	Amazonas
825	1	Anoura caudifera	LOW	0	0	NA	NA	NA	NA	Amazonas
826	1	Thamnophilus schistaceus	BAU	0	0	NA	Least Concern	1	NA	Amazonas
827	1	Centrosema plumieri	BAU	0	0	NA	NA	NA	NA	Amazonas
828	1	Pitcairnia spectabilis	HIGH	0	0	NA	NA	NA	NA	Amazonas
829	1	Anthurium polyschistum	BAU	0	0	NA	NA	NA	NA	Amazonas
830	1	Mecocerculus poecilocercus	LOW	496.66	496.59	-0.0140941489147606	Least Concern	1	NA	Amazonas
831	1	Miconia tinifolia	BAU	0	0	NA	NA	NA	NA	Amazonas
832	1	Myospiza humeralis	BAU	0	0	NA	NA	NA	NA	Amazonas
833	1	Chione venosa	BAU	0	0	NA	NA	NA	NA	Amazonas
834	1	Myrmothera campanisona	BAU	13048.92	13018.25	-0.235038608559176	Least Concern	1	NA	Amazonas
835	1	Asplenium salicifolium	LOW	45520.45	45477.35	-0.0946827195249576	NA	NA	NA	Amazonas
836	1	Cacicus chrysonotus	HIGH	0	0	NA	Least Concern	1	NA	Amazonas
837	1	Norops antonii	BAU	33799.07	33765.11	-0.100476137361173	NA	NA	NA	Amazonas
838	1	Securidaca diversifolia	HIGH	30816.76	30762.55	-0.175910770632601	Least Concern	1	NA	Amazonas
839	1	Macromitrium cirrosum	BAU	0	0	NA	NA	NA	NA	Amazonas
840	1	Heliconia longiflora	BAU	24096.27	24061.94	-0.142470183144535	NA	NA	NA	Amazonas
841	1	Senna papillosa	LOW	11759.28	11730.45	-0.245168071514582	Least Concern	1	NA	Amazonas
842	1	Pithecellobium laetum	BAU	0	0	NA	NA	NA	NA	Amazonas
843	1	Drymaria cordata	LOW	0	0	NA	NA	NA	NA	Amazonas
844	1	Aciotis rubricaulis	HIGH	0	0	NA	NA	NA	NA	Amazonas
845	1	Hemithraupis flavicollis	LOW	31862.05	31825.98	-0.113206777341696	Least Concern	1	NA	Amazonas
846	1	Crotalaria sagittalis	HIGH	0	0	NA	NA	NA	NA	Amazonas
847	1	Chironius carinatus	BAU	0	0	NA	NA	NA	NA	Amazonas
848	1	Bomarea lancifolia	LOW	0	0	NA	NA	NA	NA	Amazonas
849	1	Hypopterygium tamarisci	HIGH	0	0	NA	NA	NA	NA	Amazonas
850	1	Aongstroemia filiformis	LOW	0	0	NA	NA	NA	NA	Amazonas
851	1	Miconia elaeoides	LOW	0	0	NA	NA	NA	NA	Amazonas
852	1	Geotrygon violacea	BAU	0	0	NA	Least Concern	1	NA	Amazonas
853	1	Drypetes amazonica	HIGH	0	0	NA	Least Concern	1	NA	Amazonas
854	1	Coeligena helianthea	LOW	102387.05	102350.16	-0.0360299471466357	Least Concern	1	NA	Amazonas
855	1	Psychotria remota	LOW	0	0	NA	Least Concern	1	NA	Amazonas
856	1	Syngonium hoffmannii	BAU	23042.84	23011.13	-0.137613245589516	NA	NA	NA	Amazonas
857	1	Heliodoxa rubinoides	HIGH	55982.82	55955.44	-0.0489078613760389	Least Concern	1	NA	Amazonas
858	1	Galbula leucogastra	HIGH	0	0	NA	Least Concern	1	NA	Amazonas
859	1	Myrmoborus lugubris	LOW	96275.2	96247.01	-0.0292806454829513	Vulnerable	1	NA	Amazonas
860	1	Basileuterus nigrocristatus	BAU	0	0	NA	NA	NA	NA	Amazonas
861	1	Trichomanes pinnatum	BAU	0	0	NA	NA	NA	NA	Amazonas
862	1	Inga gracilior	LOW	75809.65	75785.17	-0.0322914035350327	Least Concern	1	NA	Amazonas
863	1	Basileuterus chrysogaster	HIGH	63042.31	63013.73	-0.0453346332010906	NA	NA	NA	Amazonas
864	1	Patagioenas plumbea	BAU	0	0	NA	Least Concern	1	NA	Amazonas
865	1	Diglossa lafresnayii	BAU	0	0	NA	Least Concern	1	NA	Amazonas
866	1	Scoparia dulcis	BAU	0	0	NA	NA	NA	NA	Amazonas
867	1	Eleocharis elegans	BAU	93027.65	92987.03	-0.0436644374011333	NA	NA	NA	Amazonas
868	1	Caprimulgus nigrescens	BAU	0	0	NA	NA	NA	NA	Amazonas
869	1	Pheidole praeusta	HIGH	0	0	NA	NA	NA	NA	Amazonas
870	1	Anthurium pentaphyllum	BAU	0	0	NA	NA	NA	NA	Amazonas
871	1	Euphonia anneae	HIGH	0	0	NA	Least Concern	1	NA	Amazonas
872	1	Pheucticus aureoventris	BAU	0	0	NA	Least Concern	1	NA	Amazonas
873	1	Magnolia sambuensis	HIGH	0	0	NA	Near Threatened	1	1	Amazonas
874	1	Costus amazonicus	LOW	0	0	NA	NA	NA	NA	Amazonas
875	1	Erythrina fusca	HIGH	0	0	NA	NA	NA	NA	Amazonas
876	1	Plantago australis	HIGH	0	0	NA	NA	NA	NA	Amazonas
877	1	Notopleura plagiantha	LOW	1613.12	1611.93	-0.0737700853005249	NA	NA	NA	Amazonas
878	1	Asplundia ecuadoriensis	LOW	27049.97	27040.6	-0.0346395947943847	NA	NA	NA	Amazonas
879	1	Stylosanthes guianensis	LOW	0	0	NA	NA	NA	NA	Amazonas
880	1	Couratari guianensis	BAU	0	0	NA	NA	NA	NA	Amazonas
881	1	Buteo albicaudatus	BAU	58536.45	58534.53	-0.00328000758501456	NA	NA	NA	Amazonas
882	1	Pionus fuscus	LOW	90661.83	90611.59	-0.0554147208367681	Least Concern	1	NA	Amazonas
883	1	Heliconius hierax	LOW	81527.21	81502.63	-0.0301494433576247	NA	NA	NA	Amazonas
884	1	Aloe vera	HIGH	0	0	NA	NA	NA	NA	Amazonas
885	1	Tynanthus polyanthus	LOW	32656.42	32650.18	-0.019108034499795	NA	NA	NA	Amazonas
886	1	Guadua weberbaueri	HIGH	104488.78	104413.83	-0.0717301895954734	Least Concern	1	NA	Amazonas
887	1	Proechimys semispinosus	LOW	0	0	NA	Least Concern	1	NA	Amazonas
888	1	Philodendron megalophyllum	LOW	0	0	NA	NA	NA	NA	Amazonas
889	1	Mentzelia aspera	LOW	0	0	NA	NA	NA	NA	Amazonas
890	1	Pariana radiciflora	BAU	0	0	NA	NA	NA	NA	Amazonas
891	1	Pipreola aureopectus	BAU	0	0	NA	Least Concern	1	NA	Amazonas
892	1	Desmodium distortum	BAU	1930.21	1930.04	-0.00880733184472533	NA	NA	NA	Amazonas
893	1	Pseudomyrmex simplex	HIGH	105185.27	105108.6	-0.0728904341834158	NA	NA	NA	Amazonas
894	1	Tibouchina ciliaris	LOW	0	0	NA	NA	NA	NA	Amazonas
895	1	Forpus modestus	HIGH	31363.21	31337.9	-0.0806996477720159	Least Concern	1	NA	Amazonas
896	1	Dactylis glomerata	BAU	69178.04	69142.31	-0.0516493384316698	NA	NA	NA	Amazonas
897	1	Tersina viridis	LOW	44.05	44.03	-0.0454029511918184	Least Concern	1	NA	Amazonas
898	1	Tillandsia bulbosa	LOW	0	0	NA	NA	NA	NA	Amazonas
899	1	Myrcia sylvatica	LOW	0	0	NA	Least Concern	1	NA	Amazonas
900	1	Burmeistera cyclostigmata	BAU	198.25	198.25	0	NA	NA	NA	Amazonas
901	1	Burmeistera cyclostigmata	HIGH	195.2	194.45	-0.38422131147541	NA	NA	NA	Amazonas
902	1	Guettarda hirsuta	HIGH	0	0	NA	NA	NA	NA	Amazonas
903	1	Guzmania rhonhofiana	LOW	0	0	NA	NA	NA	NA	Amazonas
904	1	Parkerthraustes humeralis	HIGH	0	0	NA	Least Concern	1	NA	Amazonas
905	1	Myiopagis caniceps	BAU	0	0	NA	Least Concern	1	NA	Amazonas
906	1	Cranichis ciliata	LOW	2219.24	2218.86	-0.0171229790378532	NA	NA	NA	Amazonas
907	1	Sagotia racemosa	LOW	1470.32	1460.19	-0.688965667337714	Least Concern	1	NA	Amazonas
908	1	Wasmannia auropunctata	LOW	0	0	NA	NA	NA	NA	Amazonas
909	1	Pilea microphylla	LOW	0	0	NA	NA	NA	NA	Amazonas
910	1	Stevia lucida	HIGH	0	0	NA	NA	NA	NA	Amazonas
911	1	Formicarius nigricapillus	BAU	32794.5	32793.48	-0.00311027763800881	Least Concern	1	NA	Amazonas
912	1	Myrmotherula ornata	BAU	0	0	NA	NA	NA	NA	Amazonas
913	1	Hypocnemis hypoxantha	BAU	77110.89	77100.18	-0.0138890888174244	Least Concern	1	NA	Amazonas
914	1	Sicalis flaveola	BAU	0	0	NA	NA	NA	NA	Amazonas
915	1	Senecio vulgaris	HIGH	57635.33	57613.32	-0.0381883820219335	NA	NA	NA	Amazonas
916	1	Lesbia nuna	LOW	0	0	NA	Least Concern	1	NA	Amazonas
917	1	Aramides axillaris	BAU	0	0	NA	Least Concern	1	NA	Amazonas
918	1	Merganetta armata	BAU	0	0	NA	NA	NA	NA	Amazonas
919	1	Pterolepis trichotoma	LOW	0	0	NA	NA	NA	NA	Amazonas
920	1	Gymnocorymbus thayeri	BAU	0	0	NA	NA	NA	NA	Amazonas
921	1	Chlorostilbon gibsoni	HIGH	87490.92	87433.44	-0.0656982461722839	Least Concern	1	1	Amazonas
922	1	Croton lechleri	BAU	96307.98	96267.71	-0.0418137728566101	NA	NA	NA	Amazonas
923	1	Pitangus sulphuratus	LOW	0	0	NA	Least Concern	1	NA	Amazonas
924	1	Elaenia cristata	HIGH	58162.15	58138.16	-0.0412467558369111	NA	NA	NA	Amazonas
925	1	Asplundia alata	HIGH	5754.55	5752.52	-0.0352764334309328	NA	NA	NA	Amazonas
926	1	Philodendron heleniae	HIGH	0	0	NA	NA	NA	NA	Amazonas
927	1	Acalypha diversifolia	BAU	0	0	NA	Least Concern	1	NA	Amazonas
928	1	Margaritopsis microdon	BAU	0	0	NA	NA	NA	NA	Amazonas
929	1	Crypturellus erythropus	HIGH	0	0	NA	Least Concern	1	NA	Amazonas
930	1	Schefflera morototoni	BAU	0	0	NA	Least Concern	1	NA	Amazonas
931	1	Dioscorea glandulosa	BAU	0	0	NA	NA	NA	NA	Amazonas
932	1	Phrynops geoffroanus	HIGH	0	0	NA	NA	NA	NA	Amazonas
933	1	Philodendron jacquinii	BAU	0	0	NA	NA	NA	NA	Amazonas
934	1	Acmella ciliata	LOW	0	0	NA	NA	NA	NA	Amazonas
935	1	Heliconius congener	LOW	0	0	NA	NA	NA	NA	Amazonas
936	1	Canavalia rosea	LOW	0	0	NA	NA	NA	NA	Amazonas
937	1	Heliconia psittacorum	LOW	0	0	NA	NA	NA	NA	Amazonas
938	1	Spermacoce prostrata	HIGH	0	0	NA	NA	NA	NA	Amazonas
939	1	Lepidothrix isidorei	LOW	0	0	NA	Near Threatened	1	NA	Amazonas
940	1	Pteroglossus sanguineus	HIGH	0	0	NA	Least Concern	1	NA	Amazonas
941	1	Porphyrio martinica	BAU	103089.43	103062.46	-0.0261617510155858	NA	NA	NA	Amazonas
942	1	Miconia rivetii	BAU	41101.87	41063.85	-0.0925018740023363	Least Concern	1	NA	Amazonas
943	1	Myrcia bracteata	BAU	0	0	NA	Least Concern	1	NA	Amazonas
944	1	Echinochloa colona	HIGH	0	0	NA	NA	NA	NA	Amazonas
945	1	Guzmania calamifolia	HIGH	0	0	NA	Least Concern	1	NA	Amazonas
946	1	Colonia colonus	HIGH	0	0	NA	Least Concern	1	NA	Amazonas
947	1	Agrostis perennans	HIGH	0	0	NA	NA	NA	NA	Amazonas
948	1	Saccharum officinarum	BAU	0	0	NA	NA	NA	NA	Amazonas
949	1	Pheucticus chrysogaster	HIGH	0	0	NA	Least Concern	1	NA	Amazonas
950	1	Tyrannulus elatus	HIGH	0	0	NA	Least Concern	1	NA	Amazonas
951	1	Stenostomum acreanum	BAU	92347.34	92307.35	-0.0433039002530995	Least Concern	1	NA	Amazonas
952	1	Clidemia octona	BAU	0	0	NA	NA	NA	NA	Amazonas
953	1	Bolborhynchus ferrugineifrons	HIGH	32748.41	32736.55	-0.0362154987066565	Vulnerable	1	1	Amazonas
954	1	Palicourea punicea	LOW	0	0	NA	NA	NA	NA	Amazonas
955	1	Juncus microcephalus	BAU	0	0	NA	NA	NA	NA	Amazonas
956	1	Desmodium incanum	HIGH	0	0	NA	NA	NA	NA	Amazonas
957	1	Vernonia arborescens	LOW	0	0	NA	Least Concern	1	NA	Amazonas
958	1	Ortalis guttata	LOW	0	0	NA	Least Concern	1	NA	Amazonas
959	1	Tangara icterocephala	BAU	0	0	NA	Least Concern	1	NA	Amazonas
960	1	Pterocarpus santalinoides	BAU	0	0	NA	Least Concern	1	NA	Amazonas
961	1	Leptodactylus wagneri	HIGH	0	0	NA	Least Concern	1	NA	Amazonas
962	1	Galbalcyrhynchus leucotis	HIGH	98754.8	98716.36	-0.038924690242907	Least Concern	1	NA	Amazonas
963	1	Penelope montagnii	BAU	104083.31	104042.35	-0.0393530912881151	Least Concern	1	NA	Amazonas
964	1	Macrolobium archeri	BAU	17884.3	17881.84	-0.0137550812723961	NA	NA	NA	Amazonas
965	1	Contopus virens	LOW	0	0	NA	Least Concern	1	NA	Amazonas
966	1	Cyanerpes nitidus	BAU	71542.12	71538.84	-0.00458471177538328	Least Concern	1	NA	Amazonas
967	1	Polygonum hydropiperoides	HIGH	0	0	NA	NA	NA	NA	Amazonas
968	1	Columba livia	HIGH	0	0	NA	NA	NA	NA	Amazonas
969	1	Pristimantis bogotensis	LOW	40259.74	40222.66	-0.0921019360780633	Least Concern	1	1	Amazonas
970	1	Euphonia rufiventris	BAU	83128.56	83095.43	-0.0398539322706957	Least Concern	1	NA	Amazonas
971	1	Baccharis buxifolia	LOW	0	0	NA	NA	NA	NA	Amazonas
972	1	Cyclodictyon albicans	LOW	83702.54	83655.28	-0.0564618469164673	NA	NA	NA	Amazonas
973	1	Monasa flavirostris	LOW	0	0	NA	Least Concern	1	NA	Amazonas
974	1	Patagioenas goodsoni	BAU	0	0	NA	Least Concern	1	NA	Amazonas
975	1	Kutchubaea sericantha	BAU	0	0	NA	NA	NA	NA	Amazonas
976	1	Schoenobryum concavifolium	HIGH	0	0	NA	NA	NA	NA	Amazonas
977	1	Conirostrum sitticolor	BAU	0	0	NA	Least Concern	1	NA	Amazonas
978	1	Ageratina glechonophylla	HIGH	0	0	NA	NA	NA	NA	Amazonas
979	1	Anthurium ravenii	BAU	0	0	NA	NA	NA	NA	Amazonas
980	1	Hymenophyllum hirsutum	HIGH	0	0	NA	NA	NA	NA	Amazonas
981	1	Chamaecrista nictitans	BAU	30574.02	30537.13	-0.120657996560477	Least Concern	1	NA	Amazonas
982	1	Solanum lycopersicum	BAU	0	0	NA	NA	NA	NA	Amazonas
983	1	Xenops rutilans	LOW	0	0	NA	NA	NA	NA	Amazonas
984	1	Myrmeciza berlepschi	HIGH	0	0	NA	NA	NA	NA	Amazonas
985	1	Molothrus aeneus	HIGH	0	0	NA	Least Concern	1	NA	Amazonas
986	1	Paepalanthus alpinus	HIGH	0	0	NA	NA	NA	NA	Amazonas
987	1	Cistothorus platensis	HIGH	20392.93	20350.9	-0.206100839849883	NA	NA	NA	Amazonas
988	1	Anthurium formosum	HIGH	0	0	NA	NA	NA	NA	Amazonas
989	1	Lasiacis maculata	LOW	0	0	NA	NA	NA	NA	Amazonas
990	1	Pitcairnia macranthera	BAU	88969.28	88959.08	-0.01146463138737	Least Concern	1	NA	Amazonas
991	1	Blechnum occidentale	HIGH	0	0	NA	NA	NA	NA	Amazonas
992	1	Aburria pipile	HIGH	0	0	NA	NA	NA	NA	Amazonas
993	1	Butorides virescens	LOW	0	0	NA	NA	NA	NA	Amazonas
994	1	Hypothyris anastasia	BAU	88376.71	88369.78	-0.00784143243169786	NA	NA	NA	Amazonas
995	1	Ludovia lancifolia	BAU	0	0	NA	NA	NA	NA	Amazonas
996	1	Baryphthengus ruficapillus	LOW	5126.97	5122.88	-0.0797742136193531	Least Concern	1	NA	Amazonas
997	1	Spathiphyllum phryniifolium	LOW	3839.35	3819.38	-0.520140127886226	NA	NA	NA	Amazonas
998	1	Reithrodontomys mexicanus	HIGH	20098.59	20047.19	-0.25573933295819	Least Concern	1	NA	Amazonas
999	1	Lycopodiella alopecuroides	LOW	9180.12	9174.96	-0.0562084155762852	NA	NA	NA	Amazonas
1000	1	Ambrosia arborescens	HIGH	0	0	NA	NA	NA	NA	Amazonas
1001	1	Pavonia fruticosa	LOW	0	0	NA	NA	NA	NA	Amazonas
1002	1	Crax daubentoni	LOW	490.31	490.25	-0.0122371560849263	Near Threatened	1	NA	Amazonas
1003	1	Dendropsophus columbianus	HIGH	26652.8	26609.72	-0.16163404970584	NA	NA	1	Amazonas
1004	1	Guzmania glomerata	HIGH	0	0	NA	NA	NA	NA	Amazonas
1005	1	Gymnopithys rufigula	BAU	0	0	NA	Least Concern	1	NA	Amazonas
1006	1	Chlorochrysa calliparaea	HIGH	16338.5	16297.15	-0.253083208372864	Least Concern	1	NA	Amazonas
1007	1	Thamniopsis undata	LOW	10287.85	10283.85	-0.0388808157195138	NA	NA	NA	Amazonas
1008	1	Gnaphalium coarctatum	BAU	23579.16	23545.24	-0.143855845585671	NA	NA	NA	Amazonas
1009	1	Myrmotherula haematonota	HIGH	0	0	NA	NA	NA	NA	Amazonas
1010	1	Cedrelinga cateniformis	HIGH	0	0	NA	Least Concern	1	NA	Amazonas
1011	1	Mikania nigropunctulata	BAU	0	0	NA	NA	NA	NA	Amazonas
1012	1	Pilosium chlorophyllum	HIGH	0	0	NA	NA	NA	NA	Amazonas
1013	1	Andira macrothyrsa	BAU	0	0	NA	NA	NA	NA	Amazonas
1014	1	Butorides virescens	BAU	0	0	NA	NA	NA	NA	Amazonas
1015	1	Breutelia chrysea	HIGH	0	0	NA	NA	NA	NA	Amazonas
1016	1	Stenospermation archeri	LOW	50884.65	50865.89	-0.036867699787661	NA	NA	NA	Amazonas
1017	1	Clidemia septuplinervia	BAU	0	0	NA	Least Concern	1	NA	Amazonas
1018	1	Miconia paleacea	HIGH	0	0	NA	Least Concern	1	NA	Amazonas
1019	1	Bathysa obovata	BAU	0	0	NA	NA	NA	NA	Amazonas
1020	1	Pristimantis paisa	LOW	0	0	NA	Least Concern	1	1	Amazonas
1021	1	Phaenostictus mcleannani	HIGH	0	0	NA	Least Concern	1	NA	Amazonas
1022	1	Stenospermation sessile	BAU	54503.61	54464.75	-0.0712980296167549	NA	NA	NA	Amazonas
1023	1	Ossaea bracteata	BAU	0	0	NA	NA	NA	NA	Amazonas
1024	1	Cayaponia racemosa	LOW	778.18	771.59	-0.846847773008805	NA	NA	NA	Amazonas
1025	1	Psychotria trivialis	LOW	0	0	NA	NA	NA	NA	Amazonas
1026	1	Sobralia fragrans	LOW	0	0	NA	NA	NA	NA	Amazonas
1027	1	Calophyllum antillanum	HIGH	2336.32	2328.32	-0.342418846733324	NA	NA	NA	Amazonas
1028	1	Ludwigia decurrens	LOW	99005.95	98964.94	-0.0414217529350456	NA	NA	NA	Amazonas
1029	1	Campylorhynchus turdinus	LOW	0	0	NA	Least Concern	1	NA	Amazonas
1030	1	Hylopezus dives	LOW	38373.67	38342.11	-0.0822438927524985	Least Concern	1	NA	Amazonas
1031	1	Furnarius leucopus	BAU	24913.15	24912.22	-0.00373296833198649	Least Concern	1	NA	Amazonas
1032	1	Portulaca oleracea	BAU	0	0	NA	NA	NA	NA	Amazonas
1033	1	Galium canescens	LOW	84465.99	84440.93	-0.0296687459651065	NA	NA	NA	Amazonas
1034	1	Sturnira luisi	LOW	0	0	NA	Least Concern	1	NA	Amazonas
1035	1	Gustavia speciosa	BAU	0	0	NA	NA	NA	NA	Amazonas
1036	1	Margaritopsis podocephala	HIGH	0	0	NA	NA	NA	NA	Amazonas
1037	1	Axinaea scutigera	BAU	0	0	NA	NA	NA	NA	Amazonas
1038	1	Mionectes striaticollis	BAU	0	0	NA	Least Concern	1	NA	Amazonas
1039	1	Metriopelia melanoptera	LOW	0	0	NA	Least Concern	1	NA	Amazonas
1040	1	Hyperbaena domingensis	BAU	0	0	NA	NA	NA	NA	Amazonas
1041	1	Hylophylax naevia	LOW	0	0	NA	NA	NA	NA	Amazonas
1042	1	Anthurium rugulosum	HIGH	0	0	NA	Least Concern	1	NA	Amazonas
1043	1	Sphagnum compactum	LOW	0	0	NA	NA	NA	NA	Amazonas
1044	1	Liabum igniarium	LOW	0	0	NA	NA	NA	NA	Amazonas
1045	1	Solanum cornifolium	HIGH	0	0	NA	Least Concern	1	NA	Amazonas
1046	1	Annona hypoglauca	HIGH	0	0	NA	Least Concern	1	NA	Amazonas
1047	1	Niphidium crassifolium	HIGH	0	0	NA	NA	NA	NA	Amazonas
1048	1	Creagrutus amoenus	HIGH	0	0	NA	NA	NA	NA	Amazonas
1049	1	Pteroglossus viridis	LOW	17024.07	16996.29	-0.163180720004081	Least Concern	1	NA	Amazonas
1050	1	Heteroponera inca	HIGH	45123.44	45095.34	-0.0622736209828103	NA	NA	NA	Amazonas
1051	1	Nycticorax nycticorax	BAU	644.31	644.24	-0.0108643354906701	Least Concern	1	NA	Amazonas
1052	1	Wilsonia canadensis	HIGH	0	0	NA	NA	NA	NA	Amazonas
1053	1	Salvia occidentalis	LOW	0	0	NA	NA	NA	NA	Amazonas
1054	1	Pharomachrus fulgidus	LOW	0	0	NA	Least Concern	1	NA	Amazonas
1055	1	Miconia bubalina	LOW	21746.99	21737.92	-0.0417069212796959	Least Concern	1	NA	Amazonas
1056	1	Atlapetes flaviceps	BAU	408.04	408.03	-0.002450740123529	Endangered	1	1	Amazonas
1057	1	Hoffmannia viridis	BAU	0	0	NA	NA	NA	NA	Amazonas
1058	1	Chiroderma trinitatum	BAU	0	0	NA	Least Concern	1	NA	Amazonas
1059	1	Sidastrum paniculatum	BAU	0	0	NA	NA	NA	NA	Amazonas
1060	1	Catharus aurantiirostris	BAU	0	0	NA	Least Concern	1	NA	Amazonas
1061	1	Acaena cylindristachya	LOW	0	0	NA	NA	NA	NA	Amazonas
1062	1	Unonopsis stipitata	HIGH	0	0	NA	Least Concern	1	NA	Amazonas
1063	1	Duguetia macrophylla	LOW	0	0	NA	Least Concern	1	NA	Amazonas
1064	1	Eryngium humile	HIGH	0	0	NA	NA	NA	NA	Amazonas
1065	1	Phlegopsis nigromaculata	LOW	105344.86	105289.25	-0.0527885271288989	Least Concern	1	NA	Amazonas
1066	1	Tangara ruficervix	HIGH	2533.35	2529.96	-0.133814909112435	Least Concern	1	NA	Amazonas
1067	1	Solanum clathratum	BAU	0	0	NA	Least Concern	1	NA	Amazonas
1068	1	Accipiter poliogaster	LOW	105344.86	105289.25	-0.0527885271288989	Near Threatened	1	NA	Amazonas
1069	1	Rustia occidentalis	HIGH	75890.17	75819.32	-0.0933585996710658	NA	NA	NA	Amazonas
1070	1	Sida linifolia	BAU	0	0	NA	NA	NA	NA	Amazonas
1071	1	Caprimulgus carolinensis	LOW	67196.96	67174.52	-0.0333943678404534	NA	NA	NA	Amazonas
1072	1	Dalechampia dioscoreifolia	HIGH	54738.11	54716.03	-0.0403375271817053	NA	NA	NA	Amazonas
1073	1	Mesonauta insignis	LOW	0	0	NA	NA	NA	NA	Amazonas
1074	1	Elaenia frantzii	HIGH	0	0	NA	Least Concern	1	NA	Amazonas
1075	1	Scleria microcarpa	LOW	0	0	NA	NA	NA	NA	Amazonas
1076	1	Phaethornis guy	BAU	0	0	NA	Least Concern	1	NA	Amazonas
1077	1	Ageratina tinifolia	HIGH	0	0	NA	NA	NA	NA	Amazonas
1078	1	Chauna chavaria	HIGH	91956.07	91883.13	-0.079320484226873	NA	NA	NA	Amazonas
1079	1	Pseudotriccus pelzelni	LOW	9538.43	9518.15	-0.212613606222415	Least Concern	1	NA	Amazonas
1080	1	Mastigodryas pleei	HIGH	0	0	NA	Least Concern	1	NA	Amazonas
1081	1	Crematogaster crinosa	LOW	0	0	NA	NA	NA	NA	Amazonas
1082	1	Galbula chalcothorax	LOW	0	0	NA	Least Concern	1	NA	Amazonas
1083	1	Lonchura malacca	BAU	0	0	NA	Least Concern	1	NA	Amazonas
1084	1	Pitangus sulphuratus	HIGH	0	0	NA	Least Concern	1	NA	Amazonas
1085	1	Geotrygon linearis	LOW	84075.7	84050.12	-0.0304249622661503	NA	NA	NA	Amazonas
1086	1	Andropogon leucostachyus	BAU	0	0	NA	NA	NA	NA	Amazonas
1087	1	Choloepus didactylus	BAU	0	0	NA	Least Concern	1	NA	Amazonas
1088	1	Adiantum obliquum	LOW	0	0	NA	NA	NA	NA	Amazonas
1089	1	Psychotria biaristata	BAU	0	0	NA	NA	NA	NA	Amazonas
1090	1	Calophyllum antillanum	LOW	2344.19	2341.14	-0.13010890755443	NA	NA	NA	Amazonas
1091	1	Todirostrum nigriceps	BAU	33411.26	33396.04	-0.0455535050159771	Least Concern	1	NA	Amazonas
1092	1	Faramea melicoccoides	BAU	0	0	NA	NA	NA	NA	Amazonas
1093	1	Cardiospermum halicacabum	BAU	0	0	NA	NA	NA	NA	Amazonas
1094	1	Lepidocolaptes affinis	LOW	0	0	NA	Least Concern	1	NA	Amazonas
1095	1	Myrmotherula fulviventris	BAU	67533.07	67495.88	-0.0550693164104672	NA	NA	NA	Amazonas
1096	1	Rhipidocladum racemiflorum	HIGH	6039.98	6039.03	-0.0157285289024106	NA	NA	NA	Amazonas
1097	1	Miconia bracteolata	LOW	8122.9	8121.43	-0.0180969850669015	NA	NA	NA	Amazonas
1098	1	Saltator maximus	LOW	36052.59	36036.48	-0.0446847230670343	Least Concern	1	NA	Amazonas
1099	1	Campylopus pittieri	BAU	39559.43	39533.23	-0.0662294679169975	NA	NA	NA	Amazonas
1100	1	Myioborus flavivertex	LOW	0	0	NA	Least Concern	1	1	Amazonas
1101	1	Miconia gleasoniana	BAU	0	0	NA	NA	NA	NA	Amazonas
1102	1	Fusaea longifolia	HIGH	41743.43	41693.77	-0.118964828716767	Least Concern	1	NA	Amazonas
1103	1	Guzmania testudinis	BAU	0	0	NA	NA	NA	NA	Amazonas
1104	1	Anaxagorea dolichocarpa	BAU	3559.6	3553.02	-0.184852230587704	Least Concern	1	NA	Amazonas
1105	1	Licania mollis	LOW	41707.17	41694.66	-0.0299948426133798	Least Concern	1	NA	Amazonas
1106	1	Coussarea macrophylla	BAU	49970.39	49934.46	-0.071902580708296	NA	NA	NA	Amazonas
1107	1	Cyperus odoratus	HIGH	0	0	NA	NA	NA	NA	Amazonas
1108	1	Calathea propinqua	HIGH	0	0	NA	NA	NA	NA	Amazonas
1109	1	Molothrus aeneus	LOW	0	0	NA	Least Concern	1	NA	Amazonas
1110	1	Xipholena punicea	HIGH	0	0	NA	Least Concern	1	NA	Amazonas
1111	1	Boa constrictor	BAU	0	0	NA	NA	NA	NA	Amazonas
1112	1	Campylopus richardii	BAU	0	0	NA	NA	NA	NA	Amazonas
1113	1	Aongstroemia filiformis	BAU	0	0	NA	NA	NA	NA	Amazonas
1114	1	Mucuna urens	HIGH	2475.09	2466.85	-0.332917186849781	NA	NA	NA	Amazonas
1115	1	Lecythis chartacea	LOW	84169.63	84117.65	-0.0617562415327363	Least Concern	1	NA	Amazonas
1116	1	Conopias cinchoneti	LOW	0	0	NA	Vulnerable	1	NA	Amazonas
1117	1	Desmodium cajanifolium	LOW	0	0	NA	Least Concern	1	NA	Amazonas
1118	1	Potos flavus	BAU	0	0	NA	Least Concern	1	NA	Amazonas
1119	1	Gonzalagunia dicocca	HIGH	0	0	NA	NA	NA	NA	Amazonas
1120	1	Brachiaria decumbens	LOW	85179.86	85129.13	-0.0595563317432031	NA	NA	NA	Amazonas
1121	1	Macroagelaius subalaris	HIGH	104352.29	104275.5	-0.0735872686646298	Endangered	1	NA	Amazonas
1122	1	Palicourea lachnantha	LOW	69755.55	69715.83	-0.0569417057137406	NA	NA	NA	Amazonas
1123	1	Palicourea perquadrangularis	BAU	0	0	NA	NA	NA	NA	Amazonas
1124	1	Philodendron fibrillosum	LOW	0	0	NA	NA	NA	NA	Amazonas
1125	1	Isertia pittieri	HIGH	0	0	NA	NA	NA	NA	Amazonas
1126	1	Epidendrum fimbriatum	HIGH	123.06	117.86	-4.22558101738989	NA	NA	NA	Amazonas
1127	1	Enterolobium schomburgkii	HIGH	0	0	NA	Least Concern	1	NA	Amazonas
1128	1	Enterolobium schomburgkii	BAU	0	0	NA	Least Concern	1	NA	Amazonas
1129	1	Miconia triplinervis	BAU	0	0	NA	Least Concern	1	NA	Amazonas
1130	1	Callicebus cupreus	LOW	0	0	NA	NA	NA	NA	Amazonas
1131	1	Ensifera ensifera	HIGH	0	0	NA	Least Concern	1	NA	Amazonas
1132	1	Dendrophidion bivittatus	BAU	0	0	NA	Least Concern	1	NA	Amazonas
1133	1	Thuidium urceolatum	BAU	74359	74321.09	-0.0509823962129715	NA	NA	NA	Amazonas
1134	1	Fissidens weirii	BAU	43859.54	43839.91	-0.0447565113541943	NA	NA	NA	Amazonas
1135	1	Randia altiscandens	BAU	16474.83	16443.58	-0.189683292634886	NA	NA	NA	Amazonas
1136	1	Ixora sparsifolia	HIGH	0	0	NA	Least Concern	1	NA	Amazonas
1137	1	Mabea standleyi	BAU	35152.69	35114.7	-0.108071387993366	NA	NA	NA	Amazonas
1138	1	Dendrophorbium lloense	HIGH	0	0	NA	NA	NA	NA	Amazonas
1139	1	Forpus conspicillatus	HIGH	39546.88	39519.49	-0.0692595724365599	Least Concern	1	NA	Amazonas
1140	1	Guatteria cestrifolia	LOW	9105.01	9079.54	-0.279736101333215	NA	NA	NA	Amazonas
1141	1	Satanoperca jurupari	BAU	0	0	NA	NA	NA	NA	Amazonas
1142	1	Rhegmatorhina cristata	BAU	0	0	NA	Least Concern	1	NA	Amazonas
1143	1	Miconia phanerostila	LOW	0	0	NA	NA	NA	NA	Amazonas
1144	1	Rottboellia cochinchinensis	BAU	63516.34	63514.06	-0.00358962748798	NA	NA	NA	Amazonas
1145	1	Euphonia laniirostris	LOW	85295.24	85249.59	-0.0535199854059954	Least Concern	1	NA	Amazonas
1146	1	Porotrichodendron lindigii	HIGH	0	0	NA	NA	NA	NA	Amazonas
1147	1	Bomarea carderi	HIGH	0	0	NA	NA	NA	NA	Amazonas
1148	1	Desmodium molliculum	HIGH	0	0	NA	NA	NA	NA	Amazonas
1149	1	Microglanis poecilus	BAU	7958.77	7958.59	-0.00226165600966344	NA	NA	NA	Amazonas
1150	1	Dioscorea decorticans	HIGH	0	0	NA	NA	NA	NA	Amazonas
1151	1	Hoffmannia killipii	BAU	105352.22	105311.24	-0.0388980887161143	NA	NA	NA	Amazonas
1152	1	Miconia neomicrantha	BAU	95495.89	95471.26	-0.0257916859039741	Least Concern	1	NA	Amazonas
1153	1	Hypsiboas lanciformis	BAU	0	0	NA	NA	NA	NA	Amazonas
1154	1	Asplenium uniseriale	LOW	11094.5	11091.69	-0.0253278651584072	NA	NA	NA	Amazonas
1155	1	Huperzia lucidula	LOW	0	0	NA	NA	NA	NA	Amazonas
1156	1	Oenocarpus mapora	LOW	74126.87	74103.29	-0.0318103273482365	NA	NA	NA	Amazonas
1157	1	Heliconius xanthocles	BAU	34610.96	34609.79	-0.00338043209433732	NA	NA	NA	Amazonas
1158	1	Rudgea lanceifolia	LOW	0	0	NA	Least Concern	1	NA	Amazonas
1159	1	Habia fuscicauda	HIGH	0	0	NA	Least Concern	1	NA	Amazonas
1160	1	Chlorothraupis olivacea	BAU	0	0	NA	NA	NA	NA	Amazonas
1161	1	Chlorothraupis olivacea	LOW	0	0	NA	NA	NA	NA	Amazonas
1162	1	Pyrrhomyias cinnamomeus	LOW	0	0	NA	Least Concern	1	NA	Amazonas
1163	1	Pistia stratiotes	BAU	37094.33	37093.31	-0.00274974638982312	NA	NA	NA	Amazonas
1164	1	Inga umbellifera	LOW	0	0	NA	Least Concern	1	NA	Amazonas
1165	1	Campylopus concolor	LOW	63604.96	63584.03	-0.0329062387587388	NA	NA	NA	Amazonas
1166	1	Calathea lateralis	HIGH	93464.8	93401.35	-0.0678865198449011	NA	NA	NA	Amazonas
1167	1	Gallinula melanops	BAU	0	0	NA	NA	NA	NA	Amazonas
1168	1	Legatus leucophaius	HIGH	0	0	NA	Least Concern	1	NA	Amazonas
1169	1	Thamnophilus atrinucha	BAU	0	0	NA	Least Concern	1	NA	Amazonas
1170	1	Paspalum plicatulum	LOW	0	0	NA	NA	NA	NA	Amazonas
1171	1	Solanum monachophyllum	LOW	0	0	NA	NA	NA	NA	Amazonas
1172	1	Conirostrum rufum	HIGH	55242.71	55194.88	-0.0865815598112434	NA	NA	NA	Amazonas
1173	1	Tithorea harmonia	LOW	0	0	NA	NA	NA	NA	Amazonas
1174	1	Chauna chavaria	BAU	92012.86	91973.3	-0.0429939901878908	NA	NA	NA	Amazonas
1175	1	Myrmotherula hauxwelli	LOW	7726.66	7706.86	-0.256255613680428	NA	NA	NA	Amazonas
1176	1	Ramphocelus nigrogularis	LOW	0	0	NA	Least Concern	1	NA	Amazonas
1177	1	Cochlidium serrulatum	LOW	0	0	NA	NA	NA	NA	Amazonas
1178	1	Chlorospingus flavigularis	LOW	13111.92	13090.59	-0.162676404370984	Least Concern	1	NA	Amazonas
1179	1	Cheilanthes bonariensis	LOW	103956	103901.42	-0.0525029820308609	NA	NA	NA	Amazonas
1180	1	Plagiocheilus solivaeformis	LOW	0	0	NA	NA	NA	NA	Amazonas
1181	1	Digitaria ciliaris	BAU	42551.45	42512.92	-0.0905492057262416	NA	NA	NA	Amazonas
1182	1	Acropternis orthonyx	HIGH	103186.57	103116.41	-0.0679933444827205	Least Concern	1	NA	Amazonas
1183	1	Amazilia tzacatl	BAU	0	0	NA	Least Concern	1	NA	Amazonas
1184	1	Squamidium livens	BAU	0	0	NA	NA	NA	NA	Amazonas
1185	1	Inga splendens	LOW	7059.29	7057.92	-0.0194070508507214	Least Concern	1	NA	Amazonas
1186	1	Solanum tuberosum	LOW	0	0	NA	NA	NA	NA	Amazonas
1187	1	Cathartes burrovianus	HIGH	93475.78	93439.76	-0.0385340459314745	Least Concern	1	NA	Amazonas
1188	1	Genipa americana	BAU	0	0	NA	NA	NA	NA	Amazonas
1189	1	Circus cinereus	BAU	0	0	NA	NA	NA	NA	Amazonas
1190	1	Leandra melanodesma	HIGH	46585.2	46559.01	-0.0562195718811877	NA	NA	NA	Amazonas
1191	1	Callicostella pallida	HIGH	0	0	NA	NA	NA	NA	Amazonas
1192	1	Vernonia scorpioides	LOW	0	0	NA	NA	NA	NA	Amazonas
1193	1	Nomonyx dominicus	HIGH	11964.54	11923.93	-0.339419651737556	Least Concern	1	NA	Amazonas
1194	1	Miconia albicans	BAU	0	0	NA	Least Concern	1	NA	Amazonas
1195	1	Guettarda elliptica	LOW	0	0	NA	Least Concern	1	NA	Amazonas
1196	1	Tillandsia turneri	HIGH	0	0	NA	NA	NA	NA	Amazonas
1197	1	Rhipsalis baccifera	HIGH	0	0	NA	Least Concern	1	NA	Amazonas
1198	1	Miconia dolichopoda	BAU	0	0	NA	Least Concern	1	NA	Amazonas
1199	1	Xenodon severus	BAU	16537.84	16519.04	-0.113678690808469	Least Concern	1	NA	Amazonas
1200	1	Campylopus densicoma	LOW	23859.4	23852.18	-0.0302606100740218	NA	NA	NA	Amazonas
1201	1	Pouteria bangii	BAU	28366.68	28331.43	-0.124265511508573	Least Concern	1	NA	Amazonas
1202	1	Buthraupis montana	HIGH	31088.77	31045.07	-0.140565226607552	Least Concern	1	NA	Amazonas
1203	1	Leptopogon superciliaris	HIGH	0	0	NA	Least Concern	1	NA	Amazonas
1204	1	Erechtites hieraciifolia	BAU	72961.39	72922.41	-0.0534255172495973	NA	NA	NA	Amazonas
1205	1	Miconia aggregata	HIGH	0	0	NA	NA	NA	NA	Amazonas
1206	1	Cercomacra parkeri	HIGH	0	0	NA	NA	NA	1	Amazonas
1207	1	Notopleura siggersiana	LOW	50655.47	50639.91	-0.0307173144381005	NA	NA	NA	Amazonas
1208	1	Catamenia inornata	HIGH	22059.42	22008.08	-0.232735040177831	Least Concern	1	NA	Amazonas
1209	1	Margaritopsis haematocarpa	HIGH	0	0	NA	NA	NA	NA	Amazonas
1210	1	Scytalopus latebricola	HIGH	0	0	NA	Near Threatened	1	1	Amazonas
1211	1	Phrygilus unicolor	HIGH	0	0	NA	NA	NA	NA	Amazonas
1212	1	Anthurium longispadiceum	BAU	0	0	NA	NA	NA	NA	Amazonas
1213	1	Desmodium campyloclados	LOW	0	0	NA	NA	NA	NA	Amazonas
1214	1	Anisognathus melanogenys	LOW	0	0	NA	Least Concern	1	1	Amazonas
1215	1	Anthurium nigropunctatum	HIGH	39876.5	39850.04	-0.0663548706631704	Near Threatened	1	NA	Amazonas
1216	1	Meriania maxima	BAU	58747.3	58745.09	-0.00376187501384132	NA	NA	NA	Amazonas
1217	1	Syngonium podophyllum	LOW	73075.52	73032.64	-0.0586790213740589	NA	NA	NA	Amazonas
1218	1	Xenops tenuirostris	HIGH	13669.2	13647.94	-0.15553214526088	Least Concern	1	NA	Amazonas
1219	1	Palicourea grandiflora	HIGH	0	0	NA	Least Concern	1	NA	Amazonas
1220	1	Picumnus olivaceus	LOW	0	0	NA	Least Concern	1	NA	Amazonas
1221	1	Thlypopsis ornata	LOW	39401.11	39365.46	-0.0904796844555939	Least Concern	1	NA	Amazonas
1222	1	Erythroxylum coca	BAU	7517.34	7508.66	-0.115466375074166	NA	NA	NA	Amazonas
1223	1	Inga lallensis	BAU	49025.26	49023.36	-0.0038755531332245	Least Concern	1	NA	Amazonas
1224	1	Desmodium axillare	HIGH	13484.64	13443.78	-0.303011426333953	NA	NA	NA	Amazonas
1225	1	Lycopodium clavatum	BAU	0	0	NA	NA	NA	NA	Amazonas
1226	1	Miconia rubiginosa	LOW	98605.87	98575.91	-0.0303835866972137	Least Concern	1	NA	Amazonas
1227	1	Monasa morphoeus	LOW	0	0	NA	Least Concern	1	NA	Amazonas
1228	1	Sturnira tildae	LOW	0	0	NA	Least Concern	1	NA	Amazonas
1229	1	Sturnella bellicosa	BAU	101991.92	101951.02	-0.0401012158610154	NA	NA	NA	Amazonas
1230	1	Cranioleuca hellmayri	LOW	0	0	NA	Least Concern	1	1	Amazonas
1231	1	Miconia ampla	LOW	0	0	NA	Least Concern	1	NA	Amazonas
1232	1	Carpodectes hopkei	LOW	0	0	NA	Least Concern	1	NA	Amazonas
1233	1	Erythrodontium longisetum	LOW	5623.06	5617.67	-0.0958552816438083	NA	NA	NA	Amazonas
1234	1	Critoniella acuminata	LOW	33521.57	33509.59	-0.0357381829073137	NA	NA	NA	Amazonas
1235	1	Molothrus oryzivorus	HIGH	83770.97	83715.51	-0.0662043187514797	Least Concern	1	NA	Amazonas
1236	1	Melanosuchus niger	BAU	0	0	NA	NA	NA	NA	Amazonas
1237	1	Heliconia rostrata	LOW	0	0	NA	NA	NA	NA	Amazonas
1238	1	Cyperus odoratus	LOW	0	0	NA	NA	NA	NA	Amazonas
1239	1	Hoplias malabaricus	LOW	0	0	NA	NA	NA	NA	Amazonas
1240	1	Lophornis ornatus	BAU	0	0	NA	Least Concern	1	NA	Amazonas
1241	1	Inga polita	LOW	0	0	NA	Least Concern	1	NA	Amazonas
1242	1	Glaucidium brasilianum	BAU	14711.95	14708.39	-0.0241980158986491	Least Concern	1	NA	Amazonas
1243	1	Discosura popelairii	LOW	0	0	NA	Near Threatened	1	NA	Amazonas
1244	1	Talinum paniculatum	BAU	0	0	NA	NA	NA	NA	Amazonas
1245	1	Myrcia aliena	HIGH	26433.25	26390.19	-0.162900891869147	Least Concern	1	NA	Amazonas
1246	1	Acalypha macrostachya	HIGH	0	0	NA	Least Concern	1	NA	Amazonas
1247	1	Adelothecium bogotense	BAU	0	0	NA	NA	NA	NA	Amazonas
1248	1	Psychotria tricolor	BAU	0	0	NA	NA	NA	NA	Amazonas
1249	1	Anthurium eminens	LOW	0	0	NA	NA	NA	NA	Amazonas
1250	1	Trichomanes radicans	HIGH	0	0	NA	NA	NA	NA	Amazonas
1251	1	Guatteria goudotiana	LOW	0	0	NA	Least Concern	1	NA	Amazonas
1252	1	Drymarchon corais	LOW	20706.17	20677.41	-0.138895797725984	Least Concern	1	NA	Amazonas
1253	1	Guzmania diffusa	HIGH	100841.72	100800.36	-0.0410147704739671	Least Concern	1	NA	Amazonas
1254	1	Physalaemus fischeri	LOW	0	0	NA	Least Concern	1	NA	Amazonas
1255	1	Saltator grossus	LOW	83469.81	83447.47	-0.0267641677871275	Least Concern	1	NA	Amazonas
1256	1	Hyloscirtus palmeri	HIGH	28897.88	28852.45	-0.157208764103112	Least Concern	1	NA	Amazonas
1257	1	Lithobates catesbeianus	HIGH	51.04	51.04	0	NA	NA	NA	Amazonas
1258	1	Tangara lavinia	LOW	0	0	NA	Least Concern	1	NA	Amazonas
1259	1	Ageratum conyzoides	HIGH	76214.21	76162.94	-0.0672709196880793	NA	NA	NA	Amazonas
1260	1	Leptodactylus fuscus	LOW	0	0	NA	Least Concern	1	NA	Amazonas
1261	1	Myrmeciza nigricauda	BAU	0	0	NA	NA	NA	NA	Amazonas
1262	1	Hesperomeles obtusifolia	LOW	0	0	NA	NA	NA	NA	Amazonas
1263	1	Cedrela odorata	BAU	0	0	NA	Vulnerable	1	NA	Amazonas
1264	1	Hymenophyllum fragile	BAU	0	0	NA	NA	NA	NA	Amazonas
1265	1	Cyperus surinamensis	LOW	0	0	NA	NA	NA	NA	Amazonas
1266	1	Leucopternis semiplumbeus	LOW	0	0	NA	Least Concern	1	NA	Amazonas
1267	1	Paraserianthes lophantha	LOW	65950.97	65910.49	-0.0613789304387728	NA	NA	NA	Amazonas
1268	1	Campylorhynchus zonatus	BAU	10.06	10.06	0	Least Concern	1	NA	Amazonas
1269	1	Philydor fuscipenne	LOW	0	0	NA	Least Concern	1	NA	Amazonas
1270	1	Solanum loxophyllum	LOW	0	0	NA	NA	NA	NA	Amazonas
1271	1	Parkia multijuga	LOW	0	0	NA	Least Concern	1	NA	Amazonas
1272	1	Hemidoras stenopeltis	BAU	0	0	NA	NA	NA	NA	Amazonas
1273	1	Vigna peduncularis	HIGH	0	0	NA	NA	NA	NA	Amazonas
1274	1	Pagamea dudleyi	HIGH	32824.99	32781.09	-0.133739568542143	NA	NA	NA	Amazonas
1275	1	Campylopus albidovirens	LOW	0	0	NA	NA	NA	NA	Amazonas
1276	1	Ara chloropterus	BAU	0	0	NA	Least Concern	1	NA	Amazonas
1277	1	Dysithamnus leucostictus	BAU	94425.56	94414.17	-0.0120624119147394	Vulnerable	1	NA	Amazonas
1278	1	Geogenanthus ciliatus	HIGH	22872.89	22845.58	-0.119398991557244	NA	NA	NA	Amazonas
1279	1	Aegiphila elata	BAU	95765.58	95724.83	-0.0425518228992087	NA	NA	NA	Amazonas
1280	1	Anthurium mindense	BAU	0	0	NA	NA	NA	NA	Amazonas
1281	1	Bactris acanthocarpa	LOW	0	0	NA	NA	NA	NA	Amazonas
1282	1	Euphonia mesochrysa	HIGH	0	0	NA	Least Concern	1	NA	Amazonas
1283	1	Clibadium laxum	LOW	0	0	NA	NA	NA	NA	Amazonas
1284	1	Pandion haliaetus	HIGH	0	0	NA	Least Concern	1	NA	Amazonas
1285	1	Tillandsia orbicularis	BAU	0	0	NA	NA	NA	NA	Amazonas
1286	1	Caperonia palustris	HIGH	50492.06	50483.45	-0.0170521860268735	NA	NA	NA	Amazonas
1287	1	Heliodoxa imperatrix	HIGH	0	0	NA	Least Concern	1	NA	Amazonas
1288	1	Solanum lycopersicum	HIGH	0	0	NA	NA	NA	NA	Amazonas
1289	1	Buchenavia tetraphylla	HIGH	0	0	NA	NA	NA	NA	Amazonas
1290	1	Polystachya concreta	HIGH	0	0	NA	NA	NA	NA	Amazonas
1291	1	Aiphanes weberbaueri	BAU	7756.35	7756.09	-0.0033520921567518	NA	NA	NA	Amazonas
1292	1	Schizoeaca fuliginosa	BAU	0	0	NA	NA	NA	NA	Amazonas
1293	1	Senna siamea	BAU	0	0	NA	Least Concern	1	NA	Amazonas
1294	1	Eucalyptus globulus	BAU	0	0	NA	Least Concern	1	NA	Amazonas
1295	1	Tococa macrosperma	HIGH	104858.89	104782.1	-0.0732317498306473	NA	NA	NA	Amazonas
1296	1	Tersina viridis	HIGH	44.04	44.02	-0.0454132606721072	Least Concern	1	NA	Amazonas
1297	1	Myrsine floridana	HIGH	0	0	NA	NA	NA	NA	Amazonas
1298	1	Hylophylax naevia	HIGH	0	0	NA	NA	NA	NA	Amazonas
1299	1	Zygodon reinwardtii	LOW	0	0	NA	NA	NA	NA	Amazonas
1300	1	Trichogaster pectoralis	HIGH	62107.37	62039.75	-0.108875967538156	NA	NA	NA	Amazonas
1301	1	Mimosa somnians	HIGH	0	0	NA	NA	NA	NA	Amazonas
1302	1	Chusquea tessellata	HIGH	0	0	NA	NA	NA	NA	Amazonas
1303	1	Lanio versicolor	LOW	0	0	NA	Least Concern	1	NA	Amazonas
1304	1	Panicum stoloniferum	BAU	0	0	NA	NA	NA	NA	Amazonas
1305	1	Sabicea villosa	HIGH	0	0	NA	NA	NA	NA	Amazonas
1306	1	Asplenium myriophyllum	LOW	0	0	NA	NA	NA	NA	Amazonas
1307	1	Carollia castanea	BAU	84213.96	84208.04	-0.00702971336345281	Least Concern	1	NA	Amazonas
1308	1	Tagetes verticillata	BAU	0	0	NA	NA	NA	NA	Amazonas
1309	1	Aechmea contracta	BAU	0	0	NA	NA	NA	NA	Amazonas
1310	1	Sais rosalia	HIGH	62342.32	62311.26	-0.0498216941557479	NA	NA	NA	Amazonas
1311	1	Psychotria buchtienii	LOW	26874.68	26843.12	-0.117433956422928	NA	NA	NA	Amazonas
1312	1	Rhynchospora corymbosa	HIGH	0	0	NA	NA	NA	NA	Amazonas
1313	1	Triolena spicata	HIGH	0	0	NA	NA	NA	NA	Amazonas
1314	1	Christensonella uncata	LOW	0	0	NA	NA	NA	NA	Amazonas
1315	1	Cladonia andesita	BAU	0	0	NA	NA	NA	NA	Amazonas
1316	1	Senecio tephrosioides	HIGH	51870	51812.98	-0.109928667823398	NA	NA	NA	Amazonas
1317	1	Aiphanes hirsuta	BAU	0	0	NA	NA	NA	NA	Amazonas
1318	1	Dieffenbachia cannifolia	HIGH	0	0	NA	NA	NA	NA	Amazonas
1319	1	Conostegia lasiopoda	HIGH	3592.69	3590.64	-0.0570603085710201	Least Concern	1	NA	Amazonas
1320	1	Passiflora mixta	LOW	77028.09	76984.99	-0.0559536138050304	NA	NA	NA	Amazonas
1321	1	Aloysia triphylla	BAU	2068.7	2066.8	-0.0918451201237316	NA	NA	NA	Amazonas
1322	1	Tillandsia confinis	BAU	35909.29	35873.34	-0.100113368991713	NA	NA	NA	Amazonas
1323	1	Impatiens walleriana	LOW	0	0	NA	NA	NA	NA	Amazonas
1324	1	Anthurium pedatoradiatum	BAU	0	0	NA	NA	NA	NA	Amazonas
1325	1	Anthurium fendleri	HIGH	55873.53	55851.73	-0.0390166864345167	NA	NA	NA	Amazonas
1326	1	Conostegia speciosa	HIGH	92394.87	92358.74	-0.0391039026300812	NA	NA	NA	Amazonas
1327	1	Crypturellus undulatus	LOW	38632.34	38615.68	-0.0431244910352213	Least Concern	1	NA	Amazonas
1328	1	Todirostrum cinereum	HIGH	0	0	NA	Least Concern	1	NA	Amazonas
1329	1	Turdus olivater	HIGH	0	0	NA	Least Concern	1	NA	Amazonas
1330	1	Couepia guianensis	LOW	62453.53	62438.18	-0.0245782744386083	Least Concern	1	NA	Amazonas
1331	1	Psychotria biaristata	HIGH	0	0	NA	NA	NA	NA	Amazonas
1332	1	Campylopus pittieri	HIGH	39522.86	39470.07	-0.133568269097937	NA	NA	NA	Amazonas
1333	1	Solanum imberbe	BAU	0	0	NA	NA	NA	NA	Amazonas
1334	1	Napeogenes pheranthes	HIGH	89958.87	89923.75	-0.0390400635312508	NA	NA	NA	Amazonas
1335	1	Cyphomandra hartwegii	HIGH	0	0	NA	NA	NA	NA	Amazonas
1336	1	Clidemia allardii	BAU	0	0	NA	NA	NA	NA	Amazonas
1337	1	Annona ambotay	HIGH	31046.14	30986.25	-0.192906428947365	Least Concern	1	NA	Amazonas
1338	1	Cordia panamensis	HIGH	0	0	NA	Least Concern	1	NA	Amazonas
1339	1	Xenops minutus	LOW	0	0	NA	Least Concern	1	NA	Amazonas
1340	1	Asplenium radicans	LOW	0	0	NA	NA	NA	NA	Amazonas
1341	1	Coussarea hirticalyx	HIGH	44842.8	44796.76	-0.102669770843928	Least Concern	1	NA	Amazonas
1342	1	Critoniopsis sodiroi	LOW	0	0	NA	Near Threatened	1	NA	Amazonas
1343	1	Centrosema macrocarpum	BAU	0	0	NA	Least Concern	1	NA	Amazonas
1344	1	Prestoea ensiformis	BAU	95037.46	94996.69	-0.0428988737704102	NA	NA	NA	Amazonas
1345	1	Dasypus novemcinctus	BAU	0	0	NA	Least Concern	1	NA	Amazonas
1346	1	Bucquetia glutinosa	LOW	0	0	NA	Least Concern	1	NA	Amazonas
1347	1	Senna pistaciifolia	BAU	103187.82	103160.45	-0.0265244483312177	NA	NA	NA	Amazonas
1348	1	Croton menthodorus	HIGH	36470.67	36443.76	-0.0737853184490338	NA	NA	NA	Amazonas
1349	1	Streptopogon calymperes	BAU	90892.91	90880.58	-0.0135654145081302	NA	NA	NA	Amazonas
1350	1	Anisognathus notabilis	HIGH	58950.36	58920.67	-0.0503644082919974	Least Concern	1	NA	Amazonas
1351	1	Inga oerstediana	BAU	0	0	NA	Least Concern	1	NA	Amazonas
1352	1	Porzana carolina	BAU	87135.1	87129.22	-0.00674814167884659	NA	NA	NA	Amazonas
1353	1	Evolvulus alsinoides	HIGH	0	0	NA	NA	NA	NA	Amazonas
1354	1	Eugenia biflora	LOW	0	0	NA	Least Concern	1	NA	Amazonas
1355	1	Philonotis uncinata	BAU	0	0	NA	NA	NA	NA	Amazonas
1356	1	Dromococcyx pavoninus	LOW	0	0	NA	Least Concern	1	NA	Amazonas
1357	1	Ferdinandusa loretensis	HIGH	0	0	NA	Least Concern	1	NA	Amazonas
1358	1	Melanosuchus niger	HIGH	0	0	NA	NA	NA	NA	Amazonas
1359	1	Jablonskia congesta	LOW	25298.14	25266.97	-0.123210639201136	NA	NA	NA	Amazonas
1360	1	Echinochloa colona	BAU	0	0	NA	NA	NA	NA	Amazonas
1361	1	Drymophila caudata	LOW	0	0	NA	Near Threatened	1	1	Amazonas
1362	1	Schinus molle	BAU	76772.44	76733.29	-0.0509948622187972	NA	NA	NA	Amazonas
1363	1	Trichomanes rigidum	LOW	45304.09	45264.07	-0.0883363952349485	NA	NA	NA	Amazonas
1364	1	Forpus passerinus	HIGH	0	0	NA	Least Concern	1	NA	Amazonas
1365	1	Rhynchosia schomburgkii	HIGH	96281	96244.18	-0.0382422284770692	NA	NA	NA	Amazonas
1366	1	Lepidopilum polytrichoides	BAU	76578.18	76573.87	-0.00562823509255205	NA	NA	NA	Amazonas
1367	1	Heterocercus flavivertex	LOW	0	0	NA	Least Concern	1	NA	Amazonas
1368	1	Anaxagorea crassipetala	LOW	0	0	NA	Least Concern	1	NA	Amazonas
1369	1	Saltator striatipectus	HIGH	0	0	NA	Least Concern	1	NA	Amazonas
1370	1	Tangara parzudakii	BAU	64918.11	64914.35	-0.00579191230305694	Least Concern	1	NA	Amazonas
1371	1	Tillandsia tetrantha	BAU	0	0	NA	NA	NA	NA	Amazonas
1372	1	Rheobates palmatus	BAU	77684.08	77643.88	-0.0517480544276216	Least Concern	1	1	Amazonas
1373	1	Pithys albifrons	LOW	0	0	NA	Least Concern	1	NA	Amazonas
1374	1	Oreochromis niloticus	HIGH	0	0	NA	NA	NA	NA	Amazonas
1375	1	Heliotropium procumbens	HIGH	57673.52	57655.26	-0.0316609771694094	NA	NA	NA	Amazonas
1376	1	Conyza sumatrensis	HIGH	42501.36	42473.49	-0.0655743722083308	NA	NA	NA	Amazonas
1377	1	Miconia fosteri	BAU	0	0	NA	NA	NA	NA	Amazonas
1378	1	Philydor pyrrhodes	HIGH	0	0	NA	Least Concern	1	NA	Amazonas
1379	1	Solanum uncinellum	LOW	24035.44	24008.5	-0.11208448857187	NA	NA	NA	Amazonas
1380	1	Pseudoplatystoma tigrinum	BAU	0	0	NA	NA	NA	NA	Amazonas
1381	1	Taphrospilus hypostictus	BAU	0	0	NA	Least Concern	1	NA	Amazonas
1382	1	Caryocar glabrum	BAU	0	0	NA	Least Concern	1	NA	Amazonas
1383	1	Philodendron roseocataphyllum	HIGH	0	0	NA	NA	NA	NA	Amazonas
1384	1	Pyrrhura picta	LOW	66771.58	66752.41	-0.0287098193572748	Least Concern	1	NA	Amazonas
1385	1	Coereba flaveola	LOW	0	0	NA	Least Concern	1	NA	Amazonas
1386	1	Saltator cinctus	LOW	56823.09	56803.25	-0.0349153838694737	Near Threatened	1	NA	Amazonas
1387	1	Guatteria schomburgkiana	HIGH	65212.93	65163.51	-0.0757825173627351	NA	NA	NA	Amazonas
1388	1	Miconia trinervia	HIGH	0	0	NA	Least Concern	1	NA	Amazonas
1389	1	Pseudomyrmex simplex	BAU	105257.23	105216.25	-0.038933192522733	NA	NA	NA	Amazonas
1390	1	Leptodactylus hylaedactylus	HIGH	68059.95	67994.47	-0.0962092978322728	NA	NA	NA	Amazonas
1391	1	Mniotilta varia	LOW	0	0	NA	Least Concern	1	NA	Amazonas
1392	1	Myrmotherula fulviventris	HIGH	67503.63	67437.2	-0.0984095225693901	NA	NA	NA	Amazonas
1393	1	Monotagma plurispicatum	LOW	0	0	NA	NA	NA	NA	Amazonas
1394	1	Erato vulcanica	BAU	0	0	NA	NA	NA	NA	Amazonas
1395	1	Sisyrinchium tinctorium	LOW	17385.24	17381.43	-0.0219151418099567	NA	NA	NA	Amazonas
1396	1	Molossus molossus	LOW	1286.28	1285.98	-0.0233230711820097	Least Concern	1	NA	Amazonas
1397	1	Tococa caudata	BAU	100627.19	100586.97	-0.0399693164441948	NA	NA	NA	Amazonas
1398	1	Brugmansia sanguinea	BAU	0	0	NA	NA	NA	NA	Amazonas
1399	1	Psychotria japurensis	LOW	99754.76	99713.51	-0.0413514101983705	NA	NA	NA	Amazonas
1400	1	Anthurium cuspidatum	LOW	41415.32	41405.63	-0.0233971390297173	NA	NA	NA	Amazonas
1401	1	Amazona amazonica	HIGH	0	0	NA	Least Concern	1	NA	Amazonas
1402	1	Gallinago nobilis	LOW	48988.75	48973.85	-0.0304151463346206	NA	NA	NA	Amazonas
1403	1	Thripadectes holostictus	HIGH	0	0	NA	Least Concern	1	NA	Amazonas
1404	1	Cacicus solitarius	HIGH	0	0	NA	Least Concern	1	NA	Amazonas
1405	1	Lipaugus vociferans	HIGH	0	0	NA	Least Concern	1	NA	Amazonas
1406	1	Masius chrysopterus	BAU	40031.86	40030.7	-0.00289769198834002	Least Concern	1	NA	Amazonas
1407	1	Prunus amplifolia	HIGH	62888.16	62829.08	-0.0939445517248425	NA	NA	NA	Amazonas
1408	1	Falco sparverius	LOW	78104.98	78080.74	-0.0310351529441409	Least Concern	1	NA	Amazonas
1409	1	Pouteria torta	HIGH	100807.89	100761.84	-0.0456809481876894	NA	NA	NA	Amazonas
1410	1	Philodendron micranthum	LOW	0	0	NA	NA	NA	NA	Amazonas
1411	1	Solanum torvum	HIGH	0	0	NA	NA	NA	NA	Amazonas
1412	1	Bactris major	BAU	0	0	NA	NA	NA	NA	Amazonas
1413	1	Inga acuminata	BAU	0	0	NA	Least Concern	1	NA	Amazonas
1414	1	Pristimantis gracilis	HIGH	0	0	NA	Vulnerable	1	1	Amazonas
1415	1	Hemispingus atropileus	HIGH	8458.55	8446.11	-0.147070124312071	NA	NA	NA	Amazonas
1416	1	Aotus vociferans	BAU	0	0	NA	Least Concern	1	NA	Amazonas
1417	1	Omphalea diandra	HIGH	0	0	NA	NA	NA	NA	Amazonas
1418	1	Tangara vitriolina	HIGH	0	0	NA	Least Concern	1	NA	Amazonas
1419	1	Lachemilla nivalis	HIGH	0	0	NA	NA	NA	NA	Amazonas
1420	1	Omphalea diandra	BAU	0	0	NA	NA	NA	NA	Amazonas
1421	1	Philodendron ligulatum	HIGH	0	0	NA	NA	NA	NA	Amazonas
1422	1	Glaucis aeneus	HIGH	91989.5	91953.71	-0.0389066143418473	Least Concern	1	NA	Amazonas
1423	1	Anthurium lingua	BAU	0	0	NA	Least Concern	1	NA	Amazonas
1424	1	Saltator atripennis	BAU	0	0	NA	Least Concern	1	NA	Amazonas
1425	1	Octoblepharum cocuiense	BAU	68946.19	68943.06	-0.00453977224848053	NA	NA	NA	Amazonas
1426	1	Calamagrostis intermedia	LOW	0	0	NA	NA	NA	NA	Amazonas
1427	1	Chaetura brachyura	HIGH	0	0	NA	Least Concern	1	NA	Amazonas
1428	1	Myrmotherula ambigua	BAU	0	0	NA	Least Concern	1	NA	Amazonas
1429	1	Heliconia pogonantha	BAU	22761.8	22730.8	-0.136193095449393	NA	NA	NA	Amazonas
1430	1	Renealmia pluriplicata	LOW	0	0	NA	NA	NA	NA	Amazonas
1431	1	Bidens triplinervia	HIGH	104875.77	104801.24	-0.0710650324665066	NA	NA	NA	Amazonas
1432	1	Campylopus nivalis	HIGH	0	0	NA	NA	NA	NA	Amazonas
1433	1	Licania hypoleuca	HIGH	83454.91	83420.38	-0.0413756362567509	Least Concern	1	NA	Amazonas
1434	1	Fluvicola pica	HIGH	9257.14	9211.97	-0.487947681465335	NA	NA	NA	Amazonas
1435	1	Tiaris fuliginosus	BAU	83357.65	83335.98	-0.0259964142463208	NA	NA	NA	Amazonas
1436	1	Doliocarpus major	BAU	0	0	NA	NA	NA	NA	Amazonas
1437	1	Sida acuta	HIGH	0	0	NA	NA	NA	NA	Amazonas
1438	1	Medicago lupulina	LOW	0	0	NA	NA	NA	NA	Amazonas
1439	1	Senna bicapsularis	BAU	72045.73	72007.16	-0.0535354420032838	Least Concern	1	NA	Amazonas
1440	1	Cryptochloa variana	HIGH	44439.62	44432.15	-0.0168093246521936	NA	NA	NA	Amazonas
1441	1	Miconia phaeophylla	BAU	0	0	NA	Least Concern	1	NA	Amazonas
1442	1	Neckera chilensis	LOW	0	0	NA	NA	NA	NA	Amazonas
1443	1	Antigonon leptopus	HIGH	42873.17	42865.11	-0.018799636229366	NA	NA	NA	Amazonas
1444	1	Notopleura plagiantha	HIGH	1609.29	1606.9	-0.14851269814638	NA	NA	NA	Amazonas
1445	1	Gastrotheca nicefori	BAU	0	0	NA	Least Concern	1	NA	Amazonas
1446	1	Miconia rubiginosa	HIGH	98571.78	98534.27	-0.038053487519445	Least Concern	1	NA	Amazonas
1447	1	Amazilia rosenbergi	HIGH	0	0	NA	Least Concern	1	NA	Amazonas
1448	1	Maieta guianensis	BAU	105342.41	105301.43	-0.0389017110962342	Least Concern	1	NA	Amazonas
1449	1	Schradera marginalis	BAU	0	0	NA	NA	NA	NA	Amazonas
1450	1	Chrysobalanus icaco	LOW	0	0	NA	Least Concern	1	NA	Amazonas
1451	1	Miconia tomentosa	LOW	0	0	NA	NA	NA	NA	Amazonas
1452	1	Sesuvium portulacastrum	HIGH	61738.31	61707.65	-0.0496612233149826	NA	NA	NA	Amazonas
1453	1	Chrysophyllum cainito	BAU	0	0	NA	NA	NA	NA	Amazonas
1454	1	Erythrina costaricensis	BAU	0	0	NA	Least Concern	1	NA	Amazonas
1455	1	Adiantum concinnum	HIGH	9555.68	9519.9	-0.374436984076493	NA	NA	NA	Amazonas
1456	1	Carex polystachya	BAU	0	0	NA	NA	NA	NA	Amazonas
1457	1	Drypetes amazonica	LOW	0	0	NA	Least Concern	1	NA	Amazonas
1458	1	Dendrocolaptes picumnus	BAU	43151.26	43149.94	-0.00305900685171119	Least Concern	1	NA	Amazonas
1459	1	Myotis riparius	LOW	0	0	NA	Least Concern	1	NA	Amazonas
1460	1	Hyptis mutabilis	BAU	103767.59	103726.66	-0.0394439150027412	NA	NA	NA	Amazonas
1461	1	Thomasomys aureus	BAU	0	0	NA	Least Concern	1	NA	Amazonas
1462	1	Turdus grayi	HIGH	0	0	NA	Least Concern	1	NA	Amazonas
1463	1	Leptodontium pungens	LOW	0	0	NA	NA	NA	NA	Amazonas
1464	1	Antidaphne viscoidea	HIGH	102149.88	102078.66	-0.0697210804359253	NA	NA	NA	Amazonas
1465	1	Jabiru mycteria	LOW	72904.28	72882.02	-0.0305331868032916	NA	NA	NA	Amazonas
1466	1	Desmodium molliculum	LOW	0	0	NA	NA	NA	NA	Amazonas
1467	1	Elleanthus oliganthus	HIGH	0	0	NA	Least Concern	1	NA	Amazonas
1468	1	Leptodontium luteum	LOW	0	0	NA	NA	NA	NA	Amazonas
1469	1	Lonchitis hirsuta	HIGH	0	0	NA	NA	NA	NA	Amazonas
1470	1	Grallaricula flavirostris	LOW	0	0	NA	Near Threatened	1	NA	Amazonas
1471	1	Breutelia inclinata	HIGH	0	0	NA	NA	NA	NA	Amazonas
1472	1	Trichomanes crispum	LOW	0	0	NA	NA	NA	NA	Amazonas
1473	1	Ardea alba	LOW	0	0	NA	NA	NA	NA	Amazonas
1474	1	Anoda cristata	HIGH	41530.5	41506.09	-0.0587760802302007	NA	NA	NA	Amazonas
1475	1	Dysithamnus occidentalis	BAU	0	0	NA	Vulnerable	1	NA	Amazonas
1476	1	Kinosternon scorpioides	BAU	0	0	NA	NA	NA	NA	Amazonas
1477	1	Carex polystachya	HIGH	0	0	NA	NA	NA	NA	Amazonas
1478	1	Espeletiopsis corymbosa	BAU	0	0	NA	NA	NA	NA	Amazonas
1479	1	Crenicichla anthurus	BAU	8472.65	8447.2	-0.300378275982118	NA	NA	NA	Amazonas
1480	1	Pouteria durlandii	HIGH	0	0	NA	Least Concern	1	NA	Amazonas
1481	1	Myiodynastes luteiventris	BAU	0	0	NA	Least Concern	1	NA	Amazonas
1482	1	Conirostrum speciosum	LOW	0	0	NA	Least Concern	1	NA	Amazonas
1483	1	Guzmania gloriosa	LOW	0	0	NA	NA	NA	NA	Amazonas
1484	1	Brosimum utile	BAU	0	0	NA	Least Concern	1	NA	Amazonas
1485	1	Porzana flaviventer	HIGH	0	0	NA	NA	NA	NA	Amazonas
1486	1	Adiantum concinnum	LOW	9556.58	9534.57	-0.230312517657993	NA	NA	NA	Amazonas
1487	1	Smilax schomburgkiana	HIGH	101486.45	101413.34	-0.0720391737024998	NA	NA	NA	Amazonas
1488	1	Borojoa patinoi	LOW	105065.45	105009.99	-0.0527861442557871	NA	NA	NA	Amazonas
1489	1	Myadestes ralloides	HIGH	0	0	NA	Least Concern	1	NA	Amazonas
1490	1	Lampropeltis triangulum	BAU	58297.94	58280.97	-0.0291090903040505	Least Concern	1	NA	Amazonas
1491	1	Hylopezus perspicillatus	HIGH	6348.72	6347.63	-0.0171688151312413	Least Concern	1	NA	Amazonas
1492	1	Dendroica cerulea	LOW	91077.36	91029.43	-0.052625592133992	NA	NA	NA	Amazonas
1493	1	Vernonia brasiliana	BAU	0	0	NA	NA	NA	NA	Amazonas
1494	1	Podiceps occipitalis	LOW	0	0	NA	NA	NA	NA	Amazonas
1495	1	Thryothorus nigricapillus	BAU	0	0	NA	NA	NA	NA	Amazonas
1496	1	Boa constrictor	LOW	0	0	NA	NA	NA	NA	Amazonas
1497	1	Tecoma stans	BAU	0	0	NA	Least Concern	1	NA	Amazonas
1498	1	Tillandsia penlandii	LOW	85188.34	85163.11	-0.0296167292378228	NA	NA	NA	Amazonas
1499	1	Guatteria megalophylla	BAU	22260.34	22259.73	-0.00274029956416022	Least Concern	1	NA	Amazonas
1500	1	Scleria mitis	BAU	0	0	NA	NA	NA	NA	Amazonas
1501	1	Croton billbergianus	HIGH	0	0	NA	Least Concern	1	NA	Amazonas
1502	1	Didelphis marsupialis	BAU	0	0	NA	Least Concern	1	NA	Amazonas
1503	1	Bryum argenteum	HIGH	0	0	NA	NA	NA	NA	Amazonas
1504	1	Cercomacra nigricans	HIGH	0	0	NA	Least Concern	1	NA	Amazonas
1505	1	Sporophila corvina	LOW	0	0	NA	Least Concern	1	NA	Amazonas
1506	1	Rhynchosia minima	HIGH	23882.3	23839	-0.181305820628663	NA	NA	NA	Amazonas
1507	1	Solanum malletii	BAU	0	0	NA	NA	NA	NA	Amazonas
1508	1	Heliconia vellerigera	BAU	0	0	NA	NA	NA	NA	Amazonas
1509	1	Leucaena leucocephala	LOW	32648.84	32642.73	-0.0187142942903962	NA	NA	NA	Amazonas
1510	1	Cyperus articulatus	HIGH	0	0	NA	NA	NA	NA	Amazonas
1511	1	Astyanax fasciatus	BAU	38461.91	38424.59	-0.0970310626799527	NA	NA	NA	Amazonas
1512	1	Amazilia cyanifrons	LOW	7139.78	7115.19	-0.344408371126283	Least Concern	1	1	Amazonas
1513	1	Critonia morifolia	HIGH	0	0	NA	Least Concern	1	NA	Amazonas
1514	1	Calliandra purdiaei	LOW	0	0	NA	NA	NA	NA	Amazonas
1515	1	Clidemia dimorphica	LOW	68113.28	68095.52	-0.0260742104916908	NA	NA	NA	Amazonas
1516	1	Alternanthera brasiliana	HIGH	90452.73	90417.03	-0.0394681288226426	NA	NA	NA	Amazonas
1517	1	Fragaria vesca	BAU	0	0	NA	NA	NA	NA	Amazonas
1518	1	Vireo flavifrons	LOW	62186.18	62147.69	-0.061894781123391	Least Concern	1	NA	Amazonas
1519	1	Myrmeciza berlepschi	LOW	0	0	NA	NA	NA	NA	Amazonas
1520	1	Solanum circinatum	HIGH	0	0	NA	NA	NA	NA	Amazonas
1521	1	Rubus nubigenus	HIGH	0	0	NA	NA	NA	NA	Amazonas
1522	1	Meriania longifolia	BAU	0	0	NA	NA	NA	NA	Amazonas
1523	1	Myiophobus pulcher	LOW	0	0	NA	NA	NA	NA	Amazonas
1524	1	Piptocoma discolor	HIGH	0	0	NA	Least Concern	1	NA	Amazonas
1525	1	Phyllanthus urinaria	HIGH	78464.73	78430.95	-0.043051190006005	NA	NA	NA	Amazonas
1526	1	Fimbristylis littoralis	HIGH	0	0	NA	NA	NA	NA	Amazonas
1527	1	Pachyramphus minor	LOW	1253.12	1252.85	-0.0215462206332978	Least Concern	1	NA	Amazonas
1528	1	Hylophilus decurtatus	HIGH	0	0	NA	NA	NA	NA	Amazonas
1529	1	Paspalum paniculatum	BAU	0	0	NA	NA	NA	NA	Amazonas
1530	1	Melinaea menophilus	HIGH	24471.83	24446.84	-0.102117414186032	NA	NA	NA	Amazonas
1531	1	Clidemia ombrophila	HIGH	0	0	NA	NA	NA	NA	Amazonas
1532	1	Heliodoxa jacula	BAU	66808.46	66796.19	-0.0183659374875638	Least Concern	1	NA	Amazonas
1533	1	Guzmania musaica	HIGH	65041.26	64981.06	-0.0925566325129685	NA	NA	NA	Amazonas
1534	1	Plica umbra	HIGH	102093.42	102050.85	-0.0416971044754818	Least Concern	1	NA	Amazonas
1535	1	Macrolobium archeri	LOW	17869.95	17866.72	-0.0180750365837597	NA	NA	NA	Amazonas
1536	1	Miconia cladonia	BAU	0	0	NA	NA	NA	NA	Amazonas
1537	1	Norops poecilopus	BAU	18443.01	18415.96	-0.146668033037987	NA	NA	NA	Amazonas
1538	1	Brachymenium columbicum	HIGH	34036.01	34018.3	-0.0520331260920394	NA	NA	NA	Amazonas
1539	1	Orthrosanthus chimboracensis	BAU	9511.26	9508.41	-0.0299644842008353	NA	NA	NA	Amazonas
1540	1	Prestoea decurrens	HIGH	0	0	NA	NA	NA	NA	Amazonas
1541	1	Gustavia hexapetala	HIGH	0	0	NA	Least Concern	1	NA	Amazonas
1542	1	Anthurium lancifolium	HIGH	0	0	NA	NA	NA	NA	Amazonas
1543	1	Ambrosia peruviana	HIGH	9758.51	9718.52	-0.409796167652641	NA	NA	NA	Amazonas
1544	1	Calathea ursina	LOW	0	0	NA	NA	NA	NA	Amazonas
1545	1	Philydor erythrocercum	HIGH	39880.41	39853.17	-0.0683042125193929	Least Concern	1	NA	Amazonas
1546	1	Mabea occidentalis	HIGH	0	0	NA	NA	NA	NA	Amazonas
1547	1	Sabicea villosa	BAU	0	0	NA	NA	NA	NA	Amazonas
1548	1	Rhodobryum grandifolium	BAU	77442.86	77402.65	-0.0519221526684402	NA	NA	NA	Amazonas
1549	1	Squamidium livens	HIGH	0	0	NA	NA	NA	NA	Amazonas
1550	1	Tetrorchidium rubrivenium	LOW	0	0	NA	Least Concern	1	NA	Amazonas
1551	1	Galium obovatum	HIGH	44623.33	44595.19	-0.0630611834661362	NA	NA	NA	Amazonas
1552	1	Automolus infuscatus	HIGH	0	0	NA	Least Concern	1	NA	Amazonas
1553	1	Faramea insignis	BAU	0	0	NA	NA	NA	NA	Amazonas
1554	1	Miconia cundinamarcensis	BAU	0	0	NA	NA	NA	NA	Amazonas
1555	1	Renealmia alpinia	HIGH	0	0	NA	NA	NA	NA	Amazonas
1556	1	Mikania banisteriae	LOW	0	0	NA	NA	NA	NA	Amazonas
1557	1	Pouteria guianensis	HIGH	0	0	NA	Least Concern	1	NA	Amazonas
1558	1	Thryothorus genibarbis	LOW	0	0	NA	NA	NA	NA	Amazonas
1559	1	Hedwigidium integrifolium	BAU	0	0	NA	NA	NA	NA	Amazonas
1560	1	Sphagnum recurvum	LOW	0	0	NA	NA	NA	NA	Amazonas
1561	1	Pentacalia kleinioides	HIGH	57076.16	57026.98	-0.0861655724561713	NA	NA	NA	Amazonas
1562	1	Conceveiba rhytidocarpa	BAU	71341.65	71337.82	-0.00536853296775053	Least Concern	1	NA	Amazonas
1563	1	Acidoton nicaraguensis	LOW	47394.53	47376.82	-0.0373671814025777	NA	NA	NA	Amazonas
1564	1	Dendrocincla fuliginosa	HIGH	0	0	NA	Least Concern	1	NA	Amazonas
1565	1	Hypsiboas lanciformis	LOW	0	0	NA	NA	NA	NA	Amazonas
1566	1	Brachypodium mexicanum	HIGH	0	0	NA	NA	NA	NA	Amazonas
1567	1	Psychotria anceps	HIGH	37464.12	37437.07	-0.0722024166055493	Least Concern	1	NA	Amazonas
1568	1	Tachornis furcata	LOW	0	0	NA	Least Concern	1	NA	Amazonas
1569	1	Ossaea cucullata	LOW	0	0	NA	NA	NA	NA	Amazonas
1570	1	Odontomachus erythrocephalus	HIGH	0	0	NA	NA	NA	NA	Amazonas
1571	1	Cyphorhinus phaeocephalus	HIGH	0	0	NA	Least Concern	1	NA	Amazonas
1572	1	Streptopogon erythrodontus	LOW	0	0	NA	NA	NA	NA	Amazonas
1573	1	Miconia cladonia	HIGH	0	0	NA	NA	NA	NA	Amazonas
1574	1	Neckera scabridens	LOW	0	0	NA	NA	NA	NA	Amazonas
1575	1	Miconia cremophylla	LOW	0	0	NA	NA	NA	NA	Amazonas
1576	1	Anurolimnas castaneiceps	BAU	0	0	NA	NA	NA	NA	Amazonas
1577	1	Rumex acetosella	HIGH	29490.12	29444.53	-0.154594148820012	NA	NA	NA	Amazonas
1578	1	Passiflora biflora	LOW	0	0	NA	NA	NA	NA	Amazonas
1579	1	Fleischmannia pratensis	BAU	94753.79	94713.12	-0.0429217659789632	NA	NA	NA	Amazonas
1580	1	Polylepis quadrijuga	BAU	8620.99	8620.74	-0.00289989896751997	NA	NA	NA	Amazonas
1581	1	Buteo brachyurus	HIGH	0	0	NA	Least Concern	1	NA	Amazonas
1582	1	Querula purpurata	LOW	99429.83	99375.92	-0.0542191412778273	Least Concern	1	NA	Amazonas
1583	1	Penelope jacquacu	BAU	46557.07	46526.13	-0.0664560720852973	Least Concern	1	NA	Amazonas
1584	1	Micrurus lemniscatus	BAU	0	0	NA	Least Concern	1	NA	Amazonas
1585	1	Geonoma piscicauda	LOW	0	0	NA	NA	NA	NA	Amazonas
1586	1	Monasa atra	LOW	0	0	NA	Least Concern	1	NA	Amazonas
1587	1	Saltator grossus	BAU	83518.55	83510.01	-0.0102252733075564	Least Concern	1	NA	Amazonas
1588	1	Hylocharis cyanus	HIGH	0	0	NA	Least Concern	1	NA	Amazonas
1589	1	Ancistrops strigilatus	HIGH	0	0	NA	Least Concern	1	NA	Amazonas
1590	1	Eschweilera itayensis	HIGH	0	0	NA	Least Concern	1	NA	Amazonas
1591	1	Heliangelus exortis	LOW	95523.04	95495.19	-0.0291552697652747	Least Concern	1	NA	Amazonas
1592	1	Dysithamnus puncticeps	LOW	0	0	NA	Least Concern	1	NA	Amazonas
1593	1	Leucopternis albicollis	LOW	0	0	NA	NA	NA	NA	Amazonas
1594	1	Anas bahamensis	BAU	9634.88	9609.66	-0.261757281875844	NA	NA	NA	Amazonas
1595	1	Picumnus granadensis	BAU	0	0	NA	Least Concern	1	1	Amazonas
1596	1	Charadrius vociferus	BAU	0	0	NA	NA	NA	NA	Amazonas
1597	1	Stachyococcus adinanthus	LOW	65562.14	65541.18	-0.0319696703005826	NA	NA	NA	Amazonas
1598	1	Emberizoides herbicola	BAU	72757.29	72754.51	-0.00382092296180745	NA	NA	NA	Amazonas
1599	1	Chlorophonia cyanea	HIGH	0	0	NA	Least Concern	1	NA	Amazonas
1600	1	Veniliornis dignus	LOW	100770.3	100731.66	-0.0383446313050566	Least Concern	1	NA	Amazonas
1601	1	Celeus torquatus	LOW	0	0	NA	Near Threatened	1	NA	Amazonas
1602	1	Turdus leucomelas	LOW	0	0	NA	Least Concern	1	NA	Amazonas
1603	1	Tringa melanoleuca	HIGH	0	0	NA	Least Concern	1	NA	Amazonas
1604	1	Miconia eugenioides	LOW	0	0	NA	Least Concern	1	NA	Amazonas
1605	1	Ossaea spicata	HIGH	0	0	NA	NA	NA	NA	Amazonas
1606	1	Holomitrium flexuosum	HIGH	0	0	NA	NA	NA	NA	Amazonas
1607	1	Hyalyris coeno	HIGH	59857.49	59829.71	-0.0464102320361225	NA	NA	NA	Amazonas
1608	1	Ara ararauna	LOW	0	0	NA	Least Concern	1	NA	Amazonas
1609	1	Dioscorea meridensis	LOW	0	0	NA	NA	NA	NA	Amazonas
1610	1	Psophia crepitans	LOW	92831.59	92783.2	-0.0521266521450289	Near Threatened	1	NA	Amazonas
1611	1	Histiopteris incisa	LOW	0	0	NA	NA	NA	NA	Amazonas
1612	1	Mabea subsessilis	BAU	51845.65	51843.71	-0.00374187612654548	NA	NA	NA	Amazonas
1613	1	Hylocharis eliciae	HIGH	0	0	NA	Least Concern	1	NA	Amazonas
1614	1	Canavalia brasiliensis	LOW	57718.04	57680.78	-0.0645552066563626	NA	NA	NA	Amazonas
1615	1	Ossaea laxivenula	HIGH	71121.85	71051.77	-0.098535119657323	NA	NA	NA	Amazonas
1616	1	Solanum nutans	BAU	0	0	NA	Least Concern	1	NA	Amazonas
1617	1	Neacomys tenuipes	LOW	60396.61	60383.37	-0.0219217601782583	Least Concern	1	NA	Amazonas
1618	1	Pipra mentalis	BAU	78759.19	78719.57	-0.0503052405693803	NA	NA	NA	Amazonas
1619	1	Pitcairnia brittoniana	HIGH	0	0	NA	NA	NA	NA	Amazonas
1620	1	Prunus serotina	HIGH	0	0	NA	Least Concern	1	NA	Amazonas
1621	1	Orthotrichum elongatum	BAU	19862.92	19828.82	-0.171676671909259	NA	NA	NA	Amazonas
1622	1	Atticora fasciata	LOW	80881.19	80856.59	-0.0304149827667049	Least Concern	1	NA	Amazonas
1623	1	Solanum mite	BAU	0	0	NA	NA	NA	NA	Amazonas
1624	1	Laniocera hypopyrra	HIGH	0	0	NA	Least Concern	1	NA	Amazonas
1625	1	Inga sertulifera	LOW	0	0	NA	Least Concern	1	NA	Amazonas
1626	1	Annona ambotay	BAU	31073.4	31048.15	-0.0812592120591889	Least Concern	1	NA	Amazonas
1627	1	Megascops albogularis	LOW	0	0	NA	Least Concern	1	NA	Amazonas
1628	1	Nonnula brunnea	HIGH	105310.44	105233.57	-0.0729937126841321	Least Concern	1	NA	Amazonas
1629	1	Philodendron megalophyllum	BAU	0	0	NA	NA	NA	NA	Amazonas
1630	1	Sideroxylon obtusifolium	LOW	0	0	NA	NA	NA	NA	Amazonas
1631	1	Monasa nigrifrons	LOW	81889.8	81864.91	-0.0303945057870448	Least Concern	1	NA	Amazonas
1632	1	Cotinga cotinga	LOW	0	0	NA	Least Concern	1	NA	Amazonas
1633	1	Cremastosperma megalophyllum	BAU	12079.29	12062.44	-0.139494953759702	NA	NA	NA	Amazonas
1634	1	Marmosa murina	LOW	0	0	NA	Least Concern	1	NA	Amazonas
1635	1	Bolbitis portoricensis	HIGH	29066.76	29056.34	-0.0358485087433145	NA	NA	NA	Amazonas
1636	1	Solanum aureum	LOW	0	0	NA	NA	NA	NA	Amazonas
1637	1	Lozania klugii	LOW	0	0	NA	NA	NA	NA	Amazonas
1638	1	Aniba guianensis	BAU	91485.96	91472.82	-0.0143628596125563	Least Concern	1	NA	Amazonas
1639	1	Brachymyrmex pictus	BAU	105344.69	105304.08	-0.0385496411826743	NA	NA	NA	Amazonas
1640	1	Chamaepetes goudotii	BAU	0	0	NA	Least Concern	1	NA	Amazonas
1641	1	Astyanax maximus	HIGH	0	0	NA	NA	NA	NA	Amazonas
1642	1	Trogon personatus	HIGH	0	0	NA	Least Concern	1	NA	Amazonas
1643	1	Solanum sessile	BAU	0	0	NA	Least Concern	1	NA	Amazonas
1644	1	Kalanchoe pinnata	BAU	0	0	NA	NA	NA	NA	Amazonas
1645	1	Leptodontium viticulosoides	BAU	74845.8	74833.4	-0.016567395899314	NA	NA	NA	Amazonas
1646	1	Dimerocostus strobilaceus	BAU	0	0	NA	NA	NA	NA	Amazonas
1647	1	Dryopteris wallichiana	HIGH	0	0	NA	NA	NA	NA	Amazonas
1648	1	Calliandra magdalenae	HIGH	0	0	NA	Least Concern	1	NA	Amazonas
1649	1	Acalypha stachyura	HIGH	40733.59	40706.04	-0.0676345983744513	NA	NA	NA	Amazonas
1650	1	Turdus olivater	BAU	0	0	NA	Least Concern	1	NA	Amazonas
1651	1	Muhlenbergia ligularis	LOW	98307.21	98254.27	-0.0538515944049295	NA	NA	NA	Amazonas
1652	1	Pseudosymblepharis schimperiana	BAU	0	0	NA	NA	NA	NA	Amazonas
1653	1	Senecio tephrosioides	LOW	51883.22	51843.7	-0.0761710626287344	NA	NA	NA	Amazonas
1654	1	Adelothecium bogotense	HIGH	0	0	NA	NA	NA	NA	Amazonas
1655	1	Xenops tenuirostris	BAU	13708.42	13707.76	-0.0048145592271017	Least Concern	1	NA	Amazonas
1656	1	Chromolaena scabra	LOW	11589.22	11583.65	-0.0480619058055651	NA	NA	NA	Amazonas
1657	1	Mechanitis lysimnia	BAU	0	0	NA	NA	NA	NA	Amazonas
1658	1	Calliandra trinervia	BAU	0	0	NA	Least Concern	1	NA	Amazonas
1659	1	Smilax siphilitica	BAU	54016.69	54014.37	-0.00429496883278059	NA	NA	NA	Amazonas
1660	1	Micrurus mipartitus	LOW	0	0	NA	Least Concern	1	NA	Amazonas
1661	1	Iridophanes pulcherrimus	HIGH	0	0	NA	Least Concern	1	NA	Amazonas
1662	1	Galbula tombacea	HIGH	0	0	NA	Least Concern	1	NA	Amazonas
1663	1	Arremon aurantiirostris	HIGH	0	0	NA	Least Concern	1	NA	Amazonas
1664	1	Hieracium avilae	LOW	0	0	NA	NA	NA	NA	Amazonas
1665	1	Pentagonia wurdackii	BAU	104774.85	104735.26	-0.0377857854246616	NA	NA	NA	Amazonas
1666	1	Arrabidaea chica	BAU	10310.62	10285.91	-0.239655811192741	NA	NA	NA	Amazonas
1667	1	Miconia tomentosa	HIGH	0	0	NA	NA	NA	NA	Amazonas
1668	1	Liophis melanotus	HIGH	7739.12	7737.86	-0.0162809208282107	NA	NA	NA	Amazonas
1669	1	Cerdocyon thous	HIGH	0	0	NA	Least Concern	1	NA	Amazonas
1670	1	Hieronyma fendleri	BAU	0	0	NA	NA	NA	NA	Amazonas
1671	1	Leptopogon superciliaris	BAU	0	0	NA	Least Concern	1	NA	Amazonas
1672	1	Ara militaris	HIGH	0	0	NA	Vulnerable	1	NA	Amazonas
1673	1	Pimelodus blochii	HIGH	45047.1	45021.52	-0.056785009467872	NA	NA	NA	Amazonas
1674	1	Cyperus tabina	BAU	0	0	NA	NA	NA	NA	Amazonas
1675	1	Hyparrhenia rufa	BAU	91264.53	91226.57	-0.0415933769669244	NA	NA	NA	Amazonas
1676	1	Hoffmannia vesiculifera	HIGH	0	0	NA	NA	NA	NA	Amazonas
1677	1	Linum usitatissimum	LOW	0	0	NA	NA	NA	NA	Amazonas
1678	1	Conceveiba guianensis	LOW	0	0	NA	NA	NA	NA	Amazonas
1679	1	Piper swartzianum	BAU	0	0	NA	NA	NA	NA	Amazonas
1680	1	Falco rufigularis	HIGH	0	0	NA	Least Concern	1	NA	Amazonas
1681	1	Tachyphonus rufiventer	HIGH	0	0	NA	NA	NA	NA	Amazonas
1682	1	Todirostrum maculatum	HIGH	0	0	NA	Least Concern	1	NA	Amazonas
1683	1	Philodendron panduriforme	BAU	0	0	NA	NA	NA	NA	Amazonas
1684	1	Parabuteo unicinctus	HIGH	0	0	NA	Least Concern	1	NA	Amazonas
1685	1	Inga multinervis	HIGH	0	0	NA	Least Concern	1	NA	Amazonas
1686	1	Tillandsia paraensis	LOW	0	0	NA	NA	NA	NA	Amazonas
1687	1	Orthopsittaca manilata	BAU	1119.32	1111.78	-0.67362327127184	NA	NA	NA	Amazonas
1688	1	Clidemia discolor	BAU	0	0	NA	Least Concern	1	NA	Amazonas
1689	1	Glaucidium jardinii	BAU	0	0	NA	Least Concern	1	NA	Amazonas
1690	1	Pilotrichella flexilis	LOW	501.27	501.18	-0.0179543958345752	NA	NA	NA	Amazonas
1691	1	Chironius carinatus	HIGH	0	0	NA	NA	NA	NA	Amazonas
1692	1	Anthurium mindense	HIGH	0	0	NA	NA	NA	NA	Amazonas
1693	1	Bolitoglossa lozanoi	HIGH	0	0	NA	Least Concern	1	NA	Amazonas
1694	1	Pristimantis taeniatus	HIGH	0	0	NA	Least Concern	1	NA	Amazonas
1695	1	Spilotes pullatus	BAU	0	0	NA	Least Concern	1	NA	Amazonas
1696	1	Tayassu pecari	HIGH	0	0	NA	Vulnerable	1	NA	Amazonas
1697	1	Mechanitis polymnia	LOW	0	0	NA	NA	NA	NA	Amazonas
1698	1	Leptopogon amaurocephalus	BAU	0	0	NA	Least Concern	1	NA	Amazonas
1699	1	Chloroceryle inda	BAU	70528.77	70489.8	-0.0552540473908749	Least Concern	1	NA	Amazonas
1700	1	Bidens pilosa	BAU	75904.38	75893.38	-0.0144919173307258	NA	NA	NA	Amazonas
1701	1	Guzmania sphaeroidea	LOW	0	0	NA	NA	NA	NA	Amazonas
1702	1	Psidium acutangulum	HIGH	5189.73	5153.53	-0.69753147080869	NA	NA	NA	Amazonas
1703	1	Geogenanthus ciliatus	LOW	22878.66	22856.82	-0.0954601362142719	NA	NA	NA	Amazonas
1704	1	Cyanocorax cayanus	LOW	0	0	NA	Least Concern	1	NA	Amazonas
1705	1	Didymocistus chrysadenius	HIGH	50040.55	50028.83	-0.0234210055644895	Least Concern	1	NA	Amazonas
1706	1	Pteridium caudatum	HIGH	0	0	NA	NA	NA	NA	Amazonas
1707	1	Ceratophrys calcarata	HIGH	22603.35	22559.35	-0.194661410808575	NA	NA	NA	Amazonas
1708	1	Aechmea mertensii	HIGH	0	0	NA	NA	NA	NA	Amazonas
1709	1	Oxandra euneura	LOW	0	0	NA	Least Concern	1	NA	Amazonas
1710	1	Christensonella uncata	HIGH	0	0	NA	NA	NA	NA	Amazonas
1711	1	Aratinga leucophthalma	LOW	105344.86	105289.25	-0.0527885271288989	NA	NA	NA	Amazonas
1712	1	Miconia albicans	LOW	0	0	NA	Least Concern	1	NA	Amazonas
1713	1	Fissidens guianensis	BAU	0	0	NA	NA	NA	NA	Amazonas
1714	1	Liophis epinephelus	LOW	0	0	NA	NA	NA	NA	Amazonas
1715	1	Carapichea dolichophylla	LOW	0	0	NA	NA	NA	NA	Amazonas
1716	1	Phyllomyias burmeisteri	LOW	5684.56	5665.89	-0.328433511124873	Least Concern	1	NA	Amazonas
1717	1	Leptodon cayanensis	HIGH	0	0	NA	Least Concern	1	NA	Amazonas
1718	1	Monoclea gottschei	LOW	0	0	NA	NA	NA	NA	Amazonas
1719	1	Seiurus motacilla	BAU	0	0	NA	NA	NA	NA	Amazonas
1720	1	Crenicichla anthurus	LOW	8479.78	8453.74	-0.307083438485443	NA	NA	NA	Amazonas
1721	1	Grallaricula nana	BAU	0	0	NA	Least Concern	1	NA	Amazonas
1722	1	Hebeclinium macrophyllum	BAU	58727.02	58704.52	-0.0383128583742203	NA	NA	NA	Amazonas
1723	1	Swartzia schultesii	HIGH	0	0	NA	NA	NA	NA	Amazonas
1724	1	Chalybura urochrysia	LOW	0	0	NA	Least Concern	1	NA	Amazonas
1725	1	Atlapetes schistaceus	HIGH	18204.65	18163.34	-0.226920045153306	Least Concern	1	NA	Amazonas
1726	1	Machaerium capote	HIGH	0	0	NA	Least Concern	1	NA	Amazonas
1727	1	Stenospermation amomifolium	BAU	0	0	NA	NA	NA	NA	Amazonas
1728	1	Guzmania lehmanniana	LOW	0	0	NA	NA	NA	NA	Amazonas
1729	1	Ceroxylon quindiuense	HIGH	99528.47	99459.8	-0.0689953336969796	NA	NA	NA	Amazonas
1730	1	Phyllomyias plumbeiceps	LOW	0	0	NA	Least Concern	1	NA	Amazonas
1731	1	Catamenia inornata	LOW	22070.88	22036.84	-0.154230370515362	Least Concern	1	NA	Amazonas
1732	1	Kinosternon scorpioides	HIGH	0	0	NA	NA	NA	NA	Amazonas
1733	1	Salix humboldtiana	LOW	0	0	NA	Least Concern	1	NA	Amazonas
1734	1	Phyllogonium fulgens	BAU	3839.44	3820.37	-0.496687016856629	NA	NA	NA	Amazonas
1735	1	Megascops colombianus	LOW	20421.3	20393.61	-0.135593718323509	Near Threatened	1	NA	Amazonas
1736	1	Phyllomyias plumbeiceps	BAU	0	0	NA	Least Concern	1	NA	Amazonas
1737	1	Diplostephium phylicoides	BAU	5102.67	5097.19	-0.10739475607869	NA	NA	NA	Amazonas
1738	1	Leptodontium longicaule	HIGH	60686.98	60635.88	-0.0842025752476162	NA	NA	NA	Amazonas
1739	1	Falco sparverius	HIGH	78084.61	78050.93	-0.0431326992604658	Least Concern	1	NA	Amazonas
1740	1	Euphonia chlorotica	BAU	0	0	NA	Least Concern	1	NA	Amazonas
1741	1	Stelgidopteryx serripennis	BAU	95064.68	95047.91	-0.0176406211013276	Least Concern	1	NA	Amazonas
1742	1	Antrophyum cajenense	BAU	0	0	NA	NA	NA	NA	Amazonas
1743	1	Schefflera blepharidophylla	LOW	0	0	NA	NA	NA	NA	Amazonas
1744	1	Pterophanes cyanopterus	HIGH	0	0	NA	Least Concern	1	NA	Amazonas
1745	1	Microgramma reptans	HIGH	0	0	NA	NA	NA	NA	Amazonas
1746	1	Oryzomys alfaroi	LOW	0	0	NA	NA	NA	NA	Amazonas
1747	1	Hypothyris anastasia	LOW	88324.26	88298.28	-0.0294143421071356	NA	NA	NA	Amazonas
1748	1	Mittenothamnium reptans	HIGH	0	0	NA	NA	NA	NA	Amazonas
1749	1	Solanum albidum	BAU	0	0	NA	Least Concern	1	NA	Amazonas
1750	1	Leporinus muyscorum	HIGH	2998.7	2998.28	-0.0140060692966825	NA	NA	1	Amazonas
1751	1	Elaeagia myriantha	BAU	0	0	NA	Least Concern	1	NA	Amazonas
1752	1	Psychotria saltatrix	BAU	26934.64	26933.98	-0.00245037616986845	NA	NA	NA	Amazonas
1753	1	Tournefortia hirsutissima	HIGH	22107.94	22054.76	-0.240547061372522	NA	NA	NA	Amazonas
1754	1	Camponotus lindigi	LOW	0	0	NA	NA	NA	NA	Amazonas
1755	1	Spermacoce capitata	HIGH	0	0	NA	NA	NA	NA	Amazonas
1756	1	Dasypus novemcinctus	LOW	0	0	NA	Least Concern	1	NA	Amazonas
1757	1	Conirostrum bicolor	LOW	60428.57	60407.69	-0.0345531923062177	Near Threatened	1	NA	Amazonas
1758	1	Psychotria klugii	LOW	48022.87	47989.37	-0.0697584296815247	NA	NA	NA	Amazonas
1759	1	Dioscorea pilosiuscula	BAU	0	0	NA	NA	NA	NA	Amazonas
1760	1	Chlorochrysa phoenicotis	LOW	0	0	NA	Least Concern	1	NA	Amazonas
1761	1	Fissidens prionodes	BAU	0	0	NA	NA	NA	NA	Amazonas
1762	1	Scleria bracteata	BAU	0	0	NA	Least Concern	1	NA	Amazonas
1763	1	Ameiva festiva	HIGH	0	0	NA	NA	NA	NA	Amazonas
1764	1	Neurolaena lobata	LOW	0	0	NA	NA	NA	NA	Amazonas
1765	1	Tonatia bidens	LOW	0	0	NA	Data Deficient	1	NA	Amazonas
1766	1	Aechmea nidularioides	LOW	32248.82	32215.55	-0.103166565474335	NA	NA	NA	Amazonas
1767	1	Ciccaba nigrolineata	BAU	0	0	NA	Least Concern	1	NA	Amazonas
1768	1	Gynoxys acostae	HIGH	0	0	NA	Least Concern	1	NA	Amazonas
1769	1	Chondrohierax uncinatus	HIGH	0	0	NA	Least Concern	1	NA	Amazonas
1770	1	Pectis elongata	BAU	12791.47	12790.96	-0.00398703198303415	NA	NA	NA	Amazonas
1771	1	Chlorophonia flavirostris	BAU	0	0	NA	Least Concern	1	NA	Amazonas
1772	1	Solanum sisymbriifolium	BAU	0	0	NA	NA	NA	NA	Amazonas
1773	1	Pariana trichosticha	BAU	0	0	NA	NA	NA	NA	Amazonas
1774	1	Cercomacra tyrannina	LOW	98345.05	98293.91	-0.0520005836592685	NA	NA	NA	Amazonas
1775	1	Monotagma juruanum	HIGH	0	0	NA	NA	NA	NA	Amazonas
1776	1	Heliconius hecuba	LOW	9536.57	9527.32	-0.0969950411940562	NA	NA	NA	Amazonas
1777	1	Psychotria alba	LOW	0	0	NA	NA	NA	NA	Amazonas
1778	1	Pariana radiciflora	LOW	0	0	NA	NA	NA	NA	Amazonas
1779	1	Psychotria capitata	LOW	0	0	NA	NA	NA	NA	Amazonas
1780	1	Ctenitis sloanei	HIGH	0	0	NA	NA	NA	NA	Amazonas
1781	1	Hylaeanthe unilateralis	BAU	0	0	NA	NA	NA	NA	Amazonas
1782	1	Pentacalia nitida	LOW	0	0	NA	NA	NA	NA	Amazonas
1783	1	Pachira insignis	HIGH	0	0	NA	NA	NA	NA	Amazonas
1784	1	Psychotria aubletiana	HIGH	0	0	NA	NA	NA	NA	Amazonas
1785	1	Lepidaploa canescens	BAU	0	0	NA	NA	NA	NA	Amazonas
1786	1	Elleanthus oliganthus	LOW	0	0	NA	Least Concern	1	NA	Amazonas
1787	1	Saltator cinctus	HIGH	56803.1	56772.97	-0.0530428797019835	Near Threatened	1	NA	Amazonas
1788	1	Miconia abbreviata	BAU	49623.87	49590.18	-0.0678907146903342	NA	NA	NA	Amazonas
1789	1	Lasiurus borealis	BAU	0	0	NA	Least Concern	1	NA	Amazonas
1790	1	Psychotria montivaga	LOW	79496.61	79455.26	-0.0520147966057997	NA	NA	NA	Amazonas
1791	1	Conirostrum cinereum	HIGH	0	0	NA	NA	NA	NA	Amazonas
1792	1	Ananas comosus	HIGH	0	0	NA	NA	NA	NA	Amazonas
1793	1	Notopleura camponutans	HIGH	0	0	NA	NA	NA	NA	Amazonas
1794	1	Randia grandifolia	LOW	13788.41	13780.15	-0.0599053843046458	Least Concern	1	NA	Amazonas
1795	1	Tillandsia emergens	BAU	2381.87	2381.77	-0.00419838194359512	Vulnerable	1	NA	Amazonas
1796	1	Bromus lanatus	HIGH	0	0	NA	NA	NA	NA	Amazonas
1797	1	Micoureus demerarae	BAU	0	0	NA	NA	NA	NA	Amazonas
1798	1	Leptodontium brachyphyllum	HIGH	0	0	NA	NA	NA	NA	Amazonas
1799	1	Alchornea coelophylla	LOW	2723.19	2706.14	-0.626103944271247	NA	NA	NA	Amazonas
1800	1	Physalis angulata	BAU	76515.94	76509.85	-0.00795912590238911	Least Concern	1	NA	Amazonas
1801	1	Miconia abbreviata	LOW	49622.15	49581.53	-0.0818586054816299	NA	NA	NA	Amazonas
1802	1	Mikania stuebelii	HIGH	0	0	NA	NA	NA	NA	Amazonas
1803	1	Micrurus filiformis	LOW	4332.72	4327.97	-0.109630901604535	Least Concern	1	NA	Amazonas
1804	1	Chamaecrista nictitans	HIGH	30575.8	30532.11	-0.142890782906739	Least Concern	1	NA	Amazonas
1805	1	Elaenia frantzii	BAU	0	0	NA	Least Concern	1	NA	Amazonas
1806	1	Elaphoglossum lingua	LOW	0	0	NA	NA	NA	NA	Amazonas
1807	1	Ferdinandusa uaupensis	HIGH	0	0	NA	Least Concern	1	NA	Amazonas
1808	1	Macairea thyrsiflora	HIGH	0	0	NA	NA	NA	NA	Amazonas
1809	1	Hyalyris coeno	BAU	59898.05	59895.29	-0.00460782947024492	NA	NA	NA	Amazonas
1810	1	Rhinophylla pumilio	HIGH	0	0	NA	Least Concern	1	NA	Amazonas
1811	1	Bolbitis portoricensis	LOW	29071.62	29063.18	-0.0290317498646401	NA	NA	NA	Amazonas
1812	1	Volatinia jacarina	BAU	0	0	NA	NA	NA	NA	Amazonas
1813	1	Aburria aburri	HIGH	0	0	NA	Near Threatened	1	NA	Amazonas
1814	1	Schefflera morototoni	HIGH	0	0	NA	Least Concern	1	NA	Amazonas
1815	1	Schradera marginalis	LOW	0	0	NA	NA	NA	NA	Amazonas
1816	1	Passiflora coccinea	HIGH	39410.64	39365.62	-0.114233110652344	NA	NA	NA	Amazonas
1817	1	Psychotria poeppigiana	HIGH	0	0	NA	NA	NA	NA	Amazonas
1818	1	Knipolegus poecilurus	HIGH	31578.03	31552.02	-0.082367392772755	Least Concern	1	NA	Amazonas
1819	1	Euscarthmus meloryphus	HIGH	99449.37	99408.06	-0.0415387246797015	Least Concern	1	NA	Amazonas
1820	1	Heliconia griggsiana	HIGH	0	0	NA	NA	NA	NA	Amazonas
1821	1	Lantana urticifolia	LOW	0	0	NA	NA	NA	NA	Amazonas
1822	1	Guzmania patula	LOW	81302.74	81260.43	-0.0520400665463578	NA	NA	NA	Amazonas
1823	1	Centropogon congestus	HIGH	0	0	NA	NA	NA	NA	Amazonas
1824	1	Celtis iguanaea	BAU	0	0	NA	Least Concern	1	NA	Amazonas
1825	1	Solanum dolosum	BAU	0	0	NA	NA	NA	NA	Amazonas
1826	1	Chlorospingus flavopectus	BAU	0	0	NA	Least Concern	1	NA	Amazonas
1827	1	Rhynchosia phaseoloides	LOW	0	0	NA	NA	NA	NA	Amazonas
1828	1	Calyptranthes macrophylla	LOW	72879.55	72830.02	-0.0679614514634062	NA	NA	NA	Amazonas
1829	1	Hevea brasiliensis	LOW	9728.65	9721.95	-0.0688687536297319	NA	NA	NA	Amazonas
1830	1	Pionus sordidus	LOW	41992.6	41976.84	-0.0375304220267429	Least Concern	1	NA	Amazonas
1831	1	Acmella alba	BAU	8495.46	8466.7	-0.338533758030741	NA	NA	NA	Amazonas
1832	1	Macrocnemum roseum	HIGH	50048.35	50036.1	-0.0244763313875482	Least Concern	1	NA	Amazonas
1833	1	Eleocharis geniculata	LOW	47789.67	47771.85	-0.0372883930774155	NA	NA	NA	Amazonas
1834	1	Guzmania mitis	HIGH	89681.7	89646.02	-0.0397851512627359	NA	NA	NA	Amazonas
1835	1	Solanum quitoense	BAU	0	0	NA	NA	NA	NA	Amazonas
1836	1	Spizastur melanoleucus	LOW	61076.68	61058.49	-0.0297822343978133	NA	NA	NA	Amazonas
1837	1	Adelobotrys klugii	BAU	0	0	NA	NA	NA	NA	Amazonas
1838	1	Zimmerius vilissimus	HIGH	0	0	NA	Least Concern	1	NA	Amazonas
1839	1	Hyalyris oulita	HIGH	25254.83	25211.65	-0.170977195253345	NA	NA	NA	Amazonas
1840	1	Chamaeza mollissima	LOW	0	0	NA	Least Concern	1	NA	Amazonas
1841	1	Desmoncus polyacanthos	BAU	0	0	NA	NA	NA	NA	Amazonas
1842	1	Cheiroglossa palmata	LOW	0	0	NA	NA	NA	NA	Amazonas
1843	1	Palicourea cogolloi	LOW	104071.57	104024.95	-0.0447960956099825	NA	NA	NA	Amazonas
1844	1	Manilkara inundata	BAU	0	0	NA	Least Concern	1	NA	Amazonas
1845	1	Hypotrachyna laevigata	HIGH	70207.17	70156.95	-0.0715311555785558	NA	NA	NA	Amazonas
1846	1	Psophia leucoptera	HIGH	0	0	NA	Near Threatened	1	NA	Amazonas
1847	1	Coursetia caribaea	BAU	22857	22856.37	-0.00275626722667462	Least Concern	1	NA	Amazonas
1848	1	Sapium marmieri	HIGH	0	0	NA	NA	NA	NA	Amazonas
1849	1	Eutresis hypereia	LOW	40328.61	40311.68	-0.0419801227961993	NA	NA	NA	Amazonas
1850	1	Melinaea maenius	BAU	102.55	102.54	-0.00975134080935242	NA	NA	NA	Amazonas
1851	1	Hirtella paniculata	BAU	0	0	NA	Least Concern	1	NA	Amazonas
1852	1	Tectaria plantaginea	HIGH	0	0	NA	NA	NA	NA	Amazonas
1853	1	Heliconius erato	LOW	0	0	NA	NA	NA	NA	Amazonas
1854	1	Guatteria amplifolia	HIGH	0	0	NA	Least Concern	1	NA	Amazonas
1855	1	Ageratina vacciniaefolia	LOW	0	0	NA	NA	NA	NA	Amazonas
1856	1	Actitis macularius	LOW	0	0	NA	NA	NA	NA	Amazonas
1857	1	Turdus nudigenis	BAU	0	0	NA	Least Concern	1	NA	Amazonas
1858	1	Pharus lappulaceus	LOW	0	0	NA	NA	NA	NA	Amazonas
1859	1	Croton palanostigma	HIGH	15224.34	15185.45	-0.255446213103487	NA	NA	NA	Amazonas
1860	1	Philander opossum	BAU	5745.36	5745.13	-0.00400323043289826	Least Concern	1	NA	Amazonas
1861	1	Cotinga nattererii	LOW	0	0	NA	Least Concern	1	NA	Amazonas
1862	1	Tangara chrysotis	LOW	0	0	NA	Least Concern	1	NA	Amazonas
1863	1	Pitcairnia fusca	BAU	0	0	NA	Least Concern	1	NA	Amazonas
1864	1	Anaxagorea brachycarpa	LOW	0	0	NA	Least Concern	1	NA	Amazonas
1865	1	Pipreola riefferii	BAU	0	0	NA	Least Concern	1	NA	Amazonas
1866	1	Miconia aureoides	BAU	102341.73	102305.16	-0.0357332243650683	NA	NA	NA	Amazonas
1867	1	Faramea ampla	BAU	21398.37	21397.76	-0.00285068442129275	NA	NA	NA	Amazonas
1868	1	Sais paraensis	LOW	0	0	NA	NA	NA	NA	Amazonas
1869	1	Philodendron ornatum	HIGH	0	0	NA	NA	NA	NA	Amazonas
1870	1	Nymphoides indica	BAU	0	0	NA	NA	NA	NA	Amazonas
1871	1	Andira multistipula	BAU	0	0	NA	NA	NA	NA	Amazonas
1872	1	Pachycondyla impressa	BAU	0	0	NA	NA	NA	NA	Amazonas
1873	1	Scleria distans	LOW	62740.82	62703.41	-0.059626252892449	NA	NA	NA	Amazonas
1874	1	Palicourea croceoides	LOW	100119.97	100083.93	-0.0359968146215067	NA	NA	NA	Amazonas
1875	1	Hypochaeris taraxacoides	LOW	0	0	NA	NA	NA	NA	Amazonas
1876	1	Porotrichum longirostre	LOW	0	0	NA	NA	NA	NA	Amazonas
1877	1	Myrcia dichasialis	LOW	0	0	NA	NA	NA	NA	Amazonas
1878	1	Oreomanes fraseri	LOW	56307.11	56295.27	-0.0210275398613138	NA	NA	NA	Amazonas
1879	1	Stelis pusilla	HIGH	48054.77	47999.83	-0.114327880458059	NA	NA	NA	Amazonas
1880	1	Inga sapindoides	LOW	31237.08	31204.66	-0.103786909659936	Least Concern	1	NA	Amazonas
1881	1	Psychotria cordobensis	BAU	0	0	NA	NA	NA	NA	Amazonas
1882	1	Plukenetia volubilis	LOW	0	0	NA	NA	NA	NA	Amazonas
1883	1	Coutarea hexandra	BAU	0	0	NA	Least Concern	1	NA	Amazonas
1884	1	Geranium sibbaldioides	LOW	105325.86	105270.26	-0.0527885554411859	NA	NA	NA	Amazonas
1885	1	Rhegmatorhina melanosticta	LOW	84661.1	84635.56	-0.0301673377737924	Least Concern	1	NA	Amazonas
1886	1	Coutarea hexandra	HIGH	0	0	NA	Least Concern	1	NA	Amazonas
1887	1	Apistogramma ortmanni	BAU	0	0	NA	NA	NA	NA	Amazonas
1888	1	Guzmania pleiosticha	HIGH	40833.9	40789.27	-0.109296442416729	NA	NA	NA	Amazonas
1889	1	Posoqueria longiflora	LOW	0	0	NA	Least Concern	1	NA	Amazonas
1890	1	Psychotria flaviflora	HIGH	0	0	NA	NA	NA	NA	Amazonas
1891	1	Cardamine ovata	LOW	89333.79	89282.22	-0.0577273168416928	NA	NA	NA	Amazonas
1892	1	Percnostola lophotes	HIGH	0	0	NA	NA	NA	NA	Amazonas
1893	1	Psychotria huampamiensis	LOW	92266.51	92220.74	-0.0496062981031682	NA	NA	NA	Amazonas
1894	1	Procyon cancrivorus	BAU	0	0	NA	Least Concern	1	NA	Amazonas
1895	1	Piculus callopterus	HIGH	0	0	NA	Least Concern	1	NA	Amazonas
1896	1	Dracontium angustispathum	LOW	88848.11	88821.54	-0.0299049692784765	NA	NA	NA	Amazonas
1897	1	Amaranthus dubius	HIGH	0	0	NA	NA	NA	NA	Amazonas
1898	1	Psilotum nudum	HIGH	2538.6	2508.76	-1.17545103600408	NA	NA	NA	Amazonas
1899	1	Gallinago nobilis	HIGH	48971.51	48949.1	-0.0457613008053121	NA	NA	NA	Amazonas
1900	1	Aratinga wagleri	HIGH	2	2	0	NA	NA	NA	Amazonas
1901	1	Brachyotum ledifolium	BAU	4581.73	4581.44	-0.00632948689687004	NA	NA	NA	Amazonas
1902	1	Ctenitis sloanei	LOW	0	0	NA	NA	NA	NA	Amazonas
1903	1	Distictella racemosa	HIGH	8984.62	8954.13	-0.33935770238476	NA	NA	NA	Amazonas
1904	1	Sterna elegans	BAU	2669.42	2653.79	-0.585520450135239	NA	NA	NA	Amazonas
1905	1	Agouticarpa curviflora	LOW	0	0	NA	Least Concern	1	NA	Amazonas
1906	1	Micropholis porphyrocarpa	HIGH	0	0	NA	Least Concern	1	NA	Amazonas
1907	1	Ara macao	BAU	0	0	NA	Least Concern	1	NA	Amazonas
1908	1	Poa horridula	BAU	0	0	NA	NA	NA	NA	Amazonas
1909	1	Dalechampia scandens	BAU	70665.03	70631.82	-0.0469963714725542	NA	NA	NA	Amazonas
1910	1	Guzmania mosquerae	HIGH	0	0	NA	NA	NA	NA	Amazonas
1911	1	Hoffmannia longipetiolata	BAU	80765.64	80761.17	-0.00553453176375642	NA	NA	NA	Amazonas
1912	1	Asplenium myriophyllum	HIGH	0	0	NA	NA	NA	NA	Amazonas
1913	1	Polypogon interruptus	HIGH	0	0	NA	NA	NA	NA	Amazonas
1914	1	Picumnus cinnamomeus	HIGH	0	0	NA	Least Concern	1	NA	Amazonas
1915	1	Axinaea scutigera	LOW	0	0	NA	NA	NA	NA	Amazonas
1916	1	Anthurium macdanielii	LOW	28077.09	28071.87	-0.0185916702906219	NA	NA	NA	Amazonas
1917	1	Psychotria santaremica	LOW	0	0	NA	NA	NA	NA	Amazonas
1918	1	Heliconia marginata	LOW	0	0	NA	NA	NA	NA	Amazonas
1919	1	Ageratina popayanensis	HIGH	0	0	NA	NA	NA	NA	Amazonas
1920	1	Psychotria santaremica	BAU	0	0	NA	NA	NA	NA	Amazonas
1921	1	Campylopus pittieri	LOW	39543.17	39509.97	-0.0839588733022595	NA	NA	NA	Amazonas
1922	1	Bolbitis nicotianifolia	HIGH	6	5.95	-0.83333333333333	NA	NA	NA	Amazonas
1923	1	Leptogium phyllocarpum	HIGH	0	0	NA	NA	NA	NA	Amazonas
1924	1	Miconia filamentosa	LOW	0	0	NA	NA	NA	NA	Amazonas
1925	1	Centropogon cornutus	LOW	0	0	NA	NA	NA	NA	Amazonas
1926	1	Hylophilus aurantiifrons	LOW	98970.77	98939.18	-0.0319185149312378	NA	NA	NA	Amazonas
1927	1	Pristimantis penelopus	LOW	0	0	NA	Least Concern	1	1	Amazonas
1928	1	Turpinia occidentalis	HIGH	0	0	NA	Least Concern	1	NA	Amazonas
1929	1	Opisthocomus hoazin	LOW	105344.86	105289.25	-0.0527885271288989	Least Concern	1	NA	Amazonas
1930	1	Gallinago gallinago	LOW	0	0	NA	Least Concern	1	NA	Amazonas
1931	1	Carex pichinchensis	LOW	0	0	NA	NA	NA	NA	Amazonas
1932	1	Lycopodiella alopecuroides	BAU	9178.41	9170.6	-0.0850909907053563	NA	NA	NA	Amazonas
1933	1	Leandra nervosa	BAU	10647.26	10621.59	-0.241094892019168	NA	NA	NA	Amazonas
1934	1	Clibadium pentaneuron	LOW	0	0	NA	NA	NA	NA	Amazonas
1935	1	Ochthornis littoralis	HIGH	0	0	NA	NA	NA	NA	Amazonas
1936	1	Ochthornis littoralis	BAU	0	0	NA	NA	NA	NA	Amazonas
1937	1	Klais guimeti	HIGH	0	0	NA	Least Concern	1	NA	Amazonas
1938	1	Limnocharis flava	HIGH	99647.53	99579.68	-0.0680899968117683	NA	NA	NA	Amazonas
1939	1	Securidaca diversifolia	LOW	30827.71	30791.22	-0.118367533624774	Least Concern	1	NA	Amazonas
1940	1	Inga pezizifera	BAU	0	0	NA	Least Concern	1	NA	Amazonas
1941	1	Knipolegus poecilurus	BAU	31625.8	31624.94	-0.00271929880034839	Least Concern	1	NA	Amazonas
1942	1	Bolitoglossa vallecula	BAU	18992.01	18965.92	-0.137373558670199	Least Concern	1	NA	Amazonas
1943	1	Dacnis cayana	LOW	0	0	NA	Least Concern	1	NA	Amazonas
1944	1	Campylopus densicoma	HIGH	23856.48	23846.71	-0.0409532336706859	NA	NA	NA	Amazonas
1945	1	Mimosa colombiana	LOW	0	0	NA	NA	NA	NA	Amazonas
1946	1	Amphilophium paniculatum	BAU	0	0	NA	NA	NA	NA	Amazonas
1947	1	Baccharis decussata	BAU	0	0	NA	NA	NA	NA	Amazonas
1948	1	Attila bolivianus	BAU	0	0	NA	Least Concern	1	NA	Amazonas
1949	1	Hylophilus muscicapinus	BAU	51744.36	51741.55	-0.00543054354135924	NA	NA	NA	Amazonas
1950	1	Cacicus chrysonotus	LOW	0	0	NA	Least Concern	1	NA	Amazonas
1951	1	Celeus flavus	LOW	95074.14	95021.26	-0.0556197510700645	Least Concern	1	NA	Amazonas
1952	1	Geonoma stricta	BAU	47298.64	47297.25	-0.00293877371526838	NA	NA	NA	Amazonas
1953	1	Philodendron wurdackii	HIGH	0	0	NA	NA	NA	NA	Amazonas
1954	1	Impatiens balsamina	HIGH	0	0	NA	NA	NA	NA	Amazonas
1955	1	Commelina diffusa	BAU	9468.84	9468.48	-0.00380194406073587	NA	NA	NA	Amazonas
1956	1	Schefflera sphaerocoma	HIGH	0	0	NA	Least Concern	1	NA	Amazonas
1957	1	Cecropia schreberiana	LOW	0	0	NA	NA	NA	NA	Amazonas
1958	1	Anthurium incurvatum	BAU	0	0	NA	NA	NA	NA	Amazonas
1959	1	Anthurium sagittatum	HIGH	0	0	NA	Least Concern	1	NA	Amazonas
1960	1	Tillandsia denudata	BAU	7091.47	7090.99	-0.00676869534807978	NA	NA	NA	Amazonas
1961	1	Solanum betaceum	LOW	56517.5	56498.2	-0.034148714999784	NA	NA	NA	Amazonas
1962	1	Acmella brachyglossa	LOW	0	0	NA	NA	NA	NA	Amazonas
1963	1	Tilesia baccata	LOW	0	0	NA	NA	NA	NA	Amazonas
1964	1	Myrmochanes hemileucus	LOW	0	0	NA	Least Concern	1	NA	Amazonas
1965	1	Tillandsia truncata	BAU	0	0	NA	NA	NA	NA	Amazonas
1966	1	Oreomanes fraseri	HIGH	56290.93	56279.34	-0.0205894626363497	NA	NA	NA	Amazonas
1967	1	Olsynium trinerve	LOW	15580.09	15576.68	-0.0218869082271017	NA	NA	NA	Amazonas
1968	1	Geothlypis semiflava	HIGH	0	0	NA	NA	NA	NA	Amazonas
1969	1	Ctenopharyngodon idella	HIGH	45371.14	45355.23	-0.0350663439358064	NA	NA	NA	Amazonas
1970	1	Clusia rosea	BAU	3820.3	3820.13	-0.00444991231055343	Least Concern	1	NA	Amazonas
1971	1	Chordeiles acutipennis	HIGH	5542.64	5505.21	-0.6753099605964	NA	NA	NA	Amazonas
1972	1	Miconia aurea	HIGH	54880.02	54850.79	-0.0532616423973532	Least Concern	1	NA	Amazonas
1973	1	Adelphobates quinquevittatus	LOW	0	0	NA	Least Concern	1	NA	Amazonas
1974	1	Guzmania altsonii	HIGH	0	0	NA	NA	NA	NA	Amazonas
1975	1	Myrciaria dubia	LOW	0	0	NA	Least Concern	1	NA	Amazonas
1976	1	Campylorhynchus zonatus	LOW	9.06	9.04	-0.220750551876395	Least Concern	1	NA	Amazonas
1977	1	Ceroxylon quindiuense	BAU	99591.41	99550.57	-0.0410075527598178	NA	NA	NA	Amazonas
1978	1	Enterolobium cyclocarpum	LOW	0	0	NA	Least Concern	1	NA	Amazonas
1979	1	Toloxis imponderosa	LOW	19448.28	19419.63	-0.147313798443861	NA	NA	NA	Amazonas
1980	1	Hyalinobatrachium fleischmanni	LOW	0	0	NA	Least Concern	1	NA	Amazonas
1981	1	Rhinella marina	LOW	0	0	NA	Least Concern	1	NA	Amazonas
1982	1	Emberizoides herbicola	LOW	72713.65	72690.75	-0.0314933991073123	NA	NA	NA	Amazonas
1983	1	Odocoileus virginianus	BAU	51272.45	51267.65	-0.00936175275415088	Least Concern	1	NA	Amazonas
1984	1	Polytmus guainumbi	LOW	8905.53	8879.38	-0.293637773383521	NA	NA	NA	Amazonas
1985	1	Dendropsophus microcephalus	HIGH	0	0	NA	Least Concern	1	NA	Amazonas
1986	1	Monstera adansonii	BAU	0	0	NA	NA	NA	NA	Amazonas
1987	1	Uncaria guianensis	HIGH	0	0	NA	NA	NA	NA	Amazonas
1988	1	Festuca subulifolia	LOW	0	0	NA	NA	NA	NA	Amazonas
1989	1	Solanum pedemontanum	BAU	99451.3	99434.68	-0.0167116970818983	NA	NA	NA	Amazonas
1990	1	Acmella ciliata	BAU	0	0	NA	NA	NA	NA	Amazonas
1991	1	Phyllanthus acuminatus	LOW	0	0	NA	NA	NA	NA	Amazonas
1992	1	Ricinus communis	HIGH	0	0	NA	NA	NA	NA	Amazonas
1993	1	Palicourea zarucchii	LOW	53936.3	53901.99	-0.0636120757263753	NA	NA	NA	Amazonas
1994	1	Hoplobatrachus tigerinus	BAU	0	0	NA	Least Concern	1	NA	Amazonas
1995	1	Miconia floribunda	LOW	0	0	NA	NA	NA	NA	Amazonas
1996	1	Dioclea reflexa	BAU	0	0	NA	NA	NA	NA	Amazonas
1997	1	Caiman crocodilus	BAU	0	0	NA	Least Concern	1	NA	Amazonas
1998	1	Albizia niopoides	HIGH	18246.98	18205.57	-0.22694166377121	Least Concern	1	NA	Amazonas
1999	1	Desmoscelis villosa	LOW	0	0	NA	NA	NA	NA	Amazonas
[truncated: 529,775 more rows]
